# Supplementary material for: Illumina error correction near highly repetitive DNA regions improves de novo genome assembly
Source: PubMed Central journal article supplement (PMC6545690; doi:10.1186/s12859-019-2906-2), 2019-06-03
Supplement: 12859_2019_2906_MOESM1_ESM.pdf [file 12859_2019_2906_MOESM1_ESM.pdf]

# Illumina error correction near highly repetitive DNA regions improves de novo genome assembly

Mahdi Heydari<sup>1,2</sup>, Giles Miclotte<sup>1,2</sup>,  
Yves Van de Peer<sup>2,3,4,5</sup>, and Jan Fostier<sup>1,2</sup>

<sup>1</sup>Department of Information Technology, Ghent University-imec, IDLab, Ghent, Belgium

<sup>2</sup>Bioinformatics Institute Ghent, Ghent, Belgium

<sup>3</sup>Center for Plant Systems Biology, VIB, Ghent, Belgium

<sup>4</sup>Department of Plant Biotechnology and Bioinformatics, Ghent University, Ghent, Belgium

<sup>5</sup>Department of Genetics, Genome Research Institute, University of Pretoria, Pretoria, South  
Africa

Contact: [jan.fostier@ugent.be](mailto:jan.fostier@ugent.be)

# Contents

|          |                                                     |           |
|----------|-----------------------------------------------------|-----------|
| <b>1</b> | <b>Parameter settings</b>                           | <b>4</b>  |
| 1.1      | ACE . . . . .                                       | 4         |
| 1.2      | BFC . . . . .                                       | 4         |
| 1.3      | BLESS2 . . . . .                                    | 4         |
| 1.4      | Browniecorrector . . . . .                          | 4         |
| 1.5      | Karect . . . . .                                    | 4         |
| 1.6      | RECKONER . . . . .                                  | 5         |
| 1.7      | SPAdes . . . . .                                    | 5         |
| 1.8      | Quast . . . . .                                     | 5         |
| <b>2</b> | <b>Data preparation</b>                             | <b>5</b>  |
| 2.1      | Illumina real data . . . . .                        | 5         |
| 2.2      | Pacbio real data . . . . .                          | 6         |
| <b>3</b> | <b><i>k</i>-mer selection</b>                       | <b>6</b>  |
| <b>4</b> | <b><i>k</i>-mer coverage</b>                        | <b>10</b> |
| <b>5</b> | <b>Results</b>                                      | <b>10</b> |
| 5.1      | Average improvement ratio of NGA50 . . . . .        | 10        |
| 5.2      | Choice of highly repetitive <i>k</i> -mer . . . . . | 10        |
| 5.3      | Choice of the number of iterations . . . . .        | 11        |
| 5.4      | Full Quast report (contigs) . . . . .               | 15        |
| 5.4.1    | D1 . . . . .                                        | 16        |
| 5.4.2    | D2 . . . . .                                        | 18        |
| 5.4.3    | D3 . . . . .                                        | 20        |
| 5.4.4    | D4 . . . . .                                        | 22        |
| 5.4.5    | D5 . . . . .                                        | 24        |
| 5.4.6    | D6 . . . . .                                        | 26        |
| 5.4.7    | D7 . . . . .                                        | 28        |
| 5.4.8    | D8 . . . . .                                        | 30        |
| 5.4.9    | D9 . . . . .                                        | 32        |
| 5.5      | Full Quast report (scaffolds) . . . . .             | 34        |
| 5.5.1    | D1 . . . . .                                        | 35        |
| 5.5.2    | D2 . . . . .                                        | 37        |
| 5.5.3    | D3 . . . . .                                        | 39        |
| 5.5.4    | D4 . . . . .                                        | 41        |
| 5.5.5    | D5 . . . . .                                        | 43        |
| 5.5.6    | D6 . . . . .                                        | 45        |
| 5.5.7    | D7 . . . . .                                        | 47        |
| 5.5.8    | D8 . . . . .                                        | 49        |
| 5.5.9    | D9 . . . . .                                        | 51        |

|                                        |    |
|----------------------------------------|----|
| 5.6 Runtime and memory usage . . . . . | 53 |
|----------------------------------------|----|

# 1 Parameter settings

Tools were executed with 64 threads. BLESS2 fails to finish with 64 threads in some datasets; therefore, only 32 cores were used by this tool. For all tables and figures in the main paper and in the supplementary data the parameters' default or recommended values were selected for each tool. Below, the command line parameters are specified for each tool individually:

## 1.1 ACE <sup>1</sup>

```
$ size=$(stat -c%s genome.fasta)
$ ./ace $size $inputreads aceOut/aceCorrected
```

## 1.2 BFC v. r181 <sup>2</sup>

```
$ size=$(stat -c%s genome.fasta)
$ ./bfc -s $size -k 33 -t 64 $inputreads >bfcOut/bfcCorrected
```

## 1.3 BLESS2 v. 1.02 <sup>3</sup>

```
$ ./bless -read $inputreads -prefix blessOut/blessCorrected
-kmerlength 31 -smpthread 32
```

## 1.4 Browniecorrector v. 1.0 <sup>4</sup>

Arguments need to be provided in the following order: the first argument is the data library (note that if there are multiple libraries, each library must be corrected individually); The second argument is the *cov* which is the depth of coverage in that library; the last argument is the working directory.

```
$ ./bashScripts/runPipeLine.sh $inputreads $cov $workdir
```

## 1.5 Karect v. 1.0 <sup>5</sup>

```
$ ./karect -correct -inputfile=$inputreads -matchtype=hamming
-celltype=diploid -resultdir=karectOut -kmer=9 -memory=32 -threads=32
```

---

<sup>1</sup><https://github.com/Sheikhizadeh/ACE.git>

<sup>2</sup><https://github.com/lh3/bfc.git>

<sup>3</sup><https://sourceforge.net/projects/bless-ec>

<sup>4</sup><https://github.com/biointec/browniecorrector.git>

<sup>5</sup><https://github.com/aminallam/karect.git>

## 1.6 RECKONER v. 1.1.1 <sup>6</sup>

```
$ size=$(stat -c%s genome.fasta)
$ reckoner -prefix reckonerOUT -threads 64 -read $inputreads -genome $size
```

## 1.7 SPAdes v. 4.12<sup>7</sup>

In order to see the impact of EC tools on assembly results, we used SPAdes to assemble both corrected and uncorrected data. The following command was used to run the SPAdes.

```
spades.py -t 32 --only-assembler --12 reads.fastq -o outputDir
```

## 1.8 Quast v. 4.6.3<sup>8</sup>

Quast provides comprehensive information on the assembly quality. The following command was used to run the Quast.

```
./quast.py asmDir/contigs.fa -R genome.fasta -o quastReport --plots-format pdf --labels "toolName"
```

# 2 Data preparation

## 2.1 Illumina real data

### 1. R1 (*Homo sapiens* Chr. 21)

Download<sup>9</sup> the row data from :[Human\\_NA19240.7z](#)

```
$ 7z e Human.NA19240.7z
```

```
$ shuffleSequences_fastq.pl NA19240-HiSeq_100_chr21_R1-paired.fq NA19240-HiSeq_100_chr21_R2-paired.fq reads.fastq
```

Download the reference genome from [hs\\_ref\\_GRCh38.p12\\_chr21.fa.gz](#)

### 2. R2 (*Homo sapiens* Chr. 14)

Download the row data from [frag\\_1.fastq.gz](#), and [frag\\_2.fastq.gz](#)

```
$ gzip -d frag_1.fastq.gz
```

```
$ gzip -d frag_2.fastq.gz
```

```
$ shuffleSequences_fastq.pl frag_1.fastq frag_2.fastq reads.fastq
```

Download the reference genome from [genome.fasta](#)

### 3. R3 (*Caenorhabditis elegans*)

Download the row data from : [SRR543736.sra](#)

```
$ fastq-dump --split-files SRR543736.sra
```

---

<sup>6</sup><https://github.com/refresh-bio/RECKONER.git>

<sup>7</sup><http://cab.spbu.ru/software/spades/>

<sup>8</sup><http://quast.sourceforge.net/quast>

<sup>9</sup>In case you have any difficulties of downloading the files, you can open this document with “document viewer” application, copy the link and paste it in your browser.

```
$ shuffleSequences_fastq.pl SRR543736.1.fastq SRR543736.2.fastq reads.fastq
Download the reference genome from c\_elegans.WS222.genomic.fa.gz
```

4. R4 (*Drosophila melanogaster*) Download the row data from [SRR823377.sra](http://SRR823377.sra)

```
$ fastq-dump --split-files SRR823377.sra
```

```
$ shuffleSequences_fastq.pl SRR823377.1.fastq SRR823377.2.fastq reads.fastq
```

Download the reference genome via the following links: [NT\\_033777.fna](http://NT_033777.fna), [NT\\_033778.fna](http://NT_033778.fna), [NT\\_033779.fna](http://NT_033779.fna), [NT\\_037436.fna](http://NT_037436.fna), [NC.004353.fna](http://NC.004353.fna) and [NC.004354.fna](http://NC.004354.fna). Then concatenate them all together:

```
$ cat NT_033777.fna NT_033779.fna NT_033778.fna NT_037436.fna NC.004353.fna NC.004354.fna > genome.fasta
```

5. R5 (*Drosophila melanogaster*) Download the row data from [SRR988075.sra](http://SRR988075.sra)

```
$ fastq-dump --split-files SRR988075.sra
```

```
$ shuffleSequences_fastq.pl SRR988075.1.fastq SRR988075.2.fastq reads.fastq
```

The reference genome is the same as R4.

6. R6 (*Arabidopsis thaliana*) Download the row data from [SRR988075.sra](http://SRR988075.sra)

```
$ fastq-dump --split-files SRR1174256.sra
```

```
$ shuffleSequences_fastq.pl SRR1174256.1.fastq SRR1174256.2.fastq reads.fastq
```

Download the reference genome from [GCF\\_000001735.4.TAIR10.1\\_genomic.fna.gz](http://GCF_000001735.4.TAIR10.1_genomic.fna.gz)

## 2.2 Pacbio real data

1. P1 (*Drosophila melanogaster*)

Download the row data from [SRR1204466.sra](http://SRR1204466.sra)

```
$ fastq-dump --split-files SRR1204466.sra
```

```
$ cat SRR1204466*.fastq >pacbio.reads.fastq
```

2. P2 (*Arabidopsis thaliana*)

Download the row data from [SRR1284707.sra](http://SRR1284707.sra)

```
$ fastq-dump --split-files SRR1284707.sra
```

```
$ cat SRR1284707*.fastq >pacbio.reads.fastq
```

## 3 *k*-mer selection

Table 1 represents the most frequent *k*-mers in each dataset. For example a poly-(A/T) 15-mer is the most frequent 15-mer in 3 datasets. We used jellyfish to count the frequency of 15-mers in the datasets as follows:

```
$ jellyfish count -m 15 -s 100M -t 64 -C reads.fastq
```

```
$ jellyfish dump mer_counts.jf -L $threshold > kmerFile.high.fasta
```

The threshold values are chosen appropriately based on the dataset size to find the top-5 most frequent 15-mers.

Fig 1 shows the average quality score of bases in reads for different polymers and a group of randomly sampled reads. This picture shows that reads contain a poly (A/T) or (C/G) have a lower quality hence they are more erroneous.

Table 1: The top-5 most frequent 15-mers in each dataset.

| Rank | 15-mer            | Frequency |
|------|-------------------|-----------|
| R1   |                   |           |
| 1    | AAAAAAAAAAAAAAAAA | 843835    |
| 2    | ACACACACACACACA   | 265661    |
| 3    | AATGGAATGGAATGG   | 134236    |
| 4    | AAAGTGCTGGGATTA   | 134174    |
| 5    | CATTCCATTCCATTC   | 133799    |
| R2   |                   |           |
| 1    | AAAAAAAAAAAAAAAAA | 2199579   |
| 2    | ACACACACACACACA   | 703103    |
| 3    | GCCTGTAATCCCAGC   | 459711    |
| 4    | AGCACTTTGGGAGGC   | 432208    |
| 5    | AAAGTGCTGGGATTA   | 431474    |
| R3   |                   |           |
| 1    | AAAAAAAAAAAAAAAAA | 1105265   |
| 2    | ATATTTTACTCTCTG   | 954488    |
| 3    | ACTCTCTGTGGCTTC   | 755111    |
| 4    | AAGCCACAGAGAGTA   | 754801    |
| 5    | CCACAGAGAGTAAAA   | 746402    |
| R4   |                   |           |
| 1    | AATAACATAGAATAA   | 5590029   |
| 2    | GAATAACATAGAATA   | 5549407   |
| 3    | ATAACATAGAATAAC   | 5503200   |
| 4    | CATAGAATAACATAG   | 5201994   |
| 5    | AAGAGAAGAGAAGAG   | 5135751   |
| R5   |                   |           |
| 1    | AAGAGAAGAGAAGAG   | 16685329  |
| 2    | ATAGAATAACATAGA   | 12988779  |
| 3    | AACACAACACAACAC   | 12987799  |
| 4    | AATAACATAGAATAA   | 9427421   |
| 5    | ATAACATAGAATAAC   | 9277417   |
| R6   |                   |           |
| 1    | ACTCCAAAACACTAA   | 1831402   |
| 2    | CCATGAAAGCTTTGA   | 1804271   |
| 3    | AAAAAAAAAAAAAAAAA | 1804010   |
| 4    | CTCCAAAACACTAAC   | 1802058   |
| 5    | TATGATTGAGTATAA   | 1794787   |

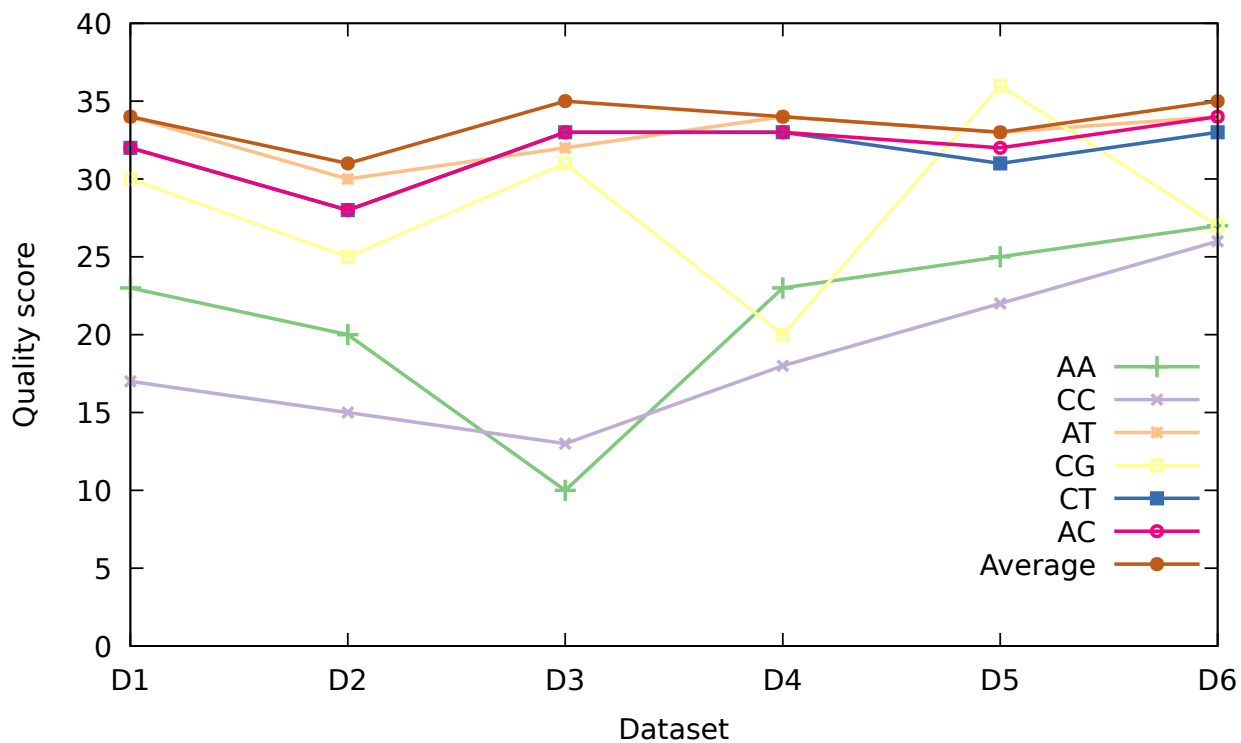

Figure 1: The average quality score of bases in reads for different polymers and a group of randomly sampled reads.

Our experimental investigations show that most of the breakpoints in the assembly results occur in the direct vicinity of highly repetitive  $k$ -mers. For example, the top 5 most frequent 15-mers in the first or last 100 bp of the assembled contigs ( $> 1000\text{bp}$ ) with SPAdes in 6 different datasets are listed in table 2:



Table 2: The top-5 most frequent 15-mers in the beginning or end of assembled contigs in different dataset.

| Rank      | 15-mer              | Frequency |
|-----------|---------------------|-----------|
| <b>R1</b> |                     |           |
| 1         | TTTTTTTTTTTTTTTT    | 1853      |
| 2         | TTTTTTTTTTTTTTTTG   | 1319      |
| 3         | AAAAAAAAAAAAAAAAAAG | 1164      |
| 4         | AGCACTTTGGGAGGC     | 933       |
| 5         | CCAGCACTTTGGGAG     | 891       |
| <b>R2</b> |                     |           |
| 1         | TTTTTTTTTTTTTTTT    | 5609      |
| 2         | TTTTTTTTTTTTTTTTG   | 4124      |
| 3         | AGCACTTTGGGAGGC     | 3825      |
| 4         | AATCCCAGCACTTTG     | 3664      |
| 5         | AAAGTGCTGGGATTA     | 3658      |
| <b>R3</b> |                     |           |
| 1         | GGGGGGGGGGGGGGG     | 1276      |
| 2         | GGGGGGGGGGGGGGA     | 617       |
| 3         | CCCCCCCCCCCCCCA     | 596       |
| 4         | TTTTTTTTTTTTTTTT    | 500       |
| 5         | TTCCCCCCCCCCCCC     | 387       |
| <b>R4</b> |                     |           |
| 1         | GGGGGGGGGGGGGGG     | 904       |
| 2         | TTTTTTTTTTTTTTTT    | 496       |
| 3         | CCCCCCCCCCCCCCA     | 494       |
| 4         | ATATATATATATATA     | 397       |
| 5         | AGGGGGGGGGGGGGG     | 363       |
| <b>R5</b> |                     |           |
| 1         | TTTTTTTTTTTTTTTT    | 1093      |
| 2         | GGGGGGGGGGGGGGG     | 758       |
| 3         | TTTTTTTTTTTTTTTTG   | 720       |
| 4         | CCCCCCCCCCCCCCA     | 434       |
| 5         | AAAAAAAAAAAAAAAAAAT | 324       |
| <b>R6</b> |                     |           |
| 1         | TTTTTTTTTTTTTTTT    | 1285      |
| 2         | TTTTTTTTTTTTTTTTG   | 607       |
| 3         | AAAAAAAAAAAAAAAAAAG | 506       |
| 4         | ATATATATATATATA     | 484       |
| 5         | AAAAAAAAAAAAAAAAAAT | 470       |

## 4 $k$ -mer coverage

Assuming a genomic region and a randomly selected  $k$ -mer from this region, the average number of reads that initially cover any base of that  $k$ -mer is the initial coverage ( $C$ ). The expected number of extracted reads from that region that contain that specific  $k$ -mer ( $C_k$ ) is given by the following formula:  $C_k = \frac{l-k+1}{l}C(1-e)^k$

where  $l$  is the read length and  $e$  is the error rate.

### Proof:

It has been shown in [1], in the absence of errors the expected coverage of reads in a region of size  $k$  is  $\frac{l-k+1}{l}C$ . However, in the presence of errors, some of these reads fail to cover that region perfectly (i.e without any mismatch) due to the sequencing error. Let us assume the errors occur independently from each other, then the probability that all the bases of a read in an interval of size  $k$  are error-free is  $(1-e)^k$ . Therefore, the expected number of reads that cover a region of  $k$  is:

$$C_k = \frac{l-k+1}{l}C(1-e)^k.$$

## 5 Results

### 5.1 Average improvement ratio of NGA50

Table 2 and 3 in the main paper show the exact values of NGA50 for contigs and scaffolds after and before the error correction. Table 3 shows the improvement rate of NGA50 for both contigs and scaffolds upon the uncorrected data for different datasets. The average improvement rate (AVG column) shows that jointly using of BrownieCorrector and Karect leads to the highest positive impact on the quality of contigs/scaffolds (+21%/+25%) whereas BrownieCorrector with (+18%/+19%), Karect with (+11%/+15%), and BFC with (+5%/+7%) are the second, third and fourth best tools. On the other hand, BLESS2 (-25%/-19%), ACE (-17%/-14%), and Reckoner(-11%/-10%) deteriorate the quality of assembly on average.

### 5.2 Choice of highly repetitive $k$ -mer

In order to see the performance of BrownieCorrector, we run the benchmark with two homopolymers poly-(A/T) and poly-(C/G). The results for poly-(A/T) are reported in the main paper. Table 4 compares the number of reads in each dataset that contains specific  $k$ -mers and respectively corrected versus the total number of reads in that dataset.

Table 5 and 6 show the NGA50 of contigs and scaffolds when reads that contain respectively a 15-mer poly (C/G) and a 15-mer poly (AC/GT) are corrected by BrownieCorrector. Table 5 indicates that correcting reads that contain a poly (C/G) often has a lower impact on the quality of the assembly (except D3 which yields in a higher NGA50). This is due to the fact that a poly C is less occurred than a poly A in all the datasets and the assembler can itself handle the associated complexity. Table 6 indicates that correcting reads that contain a poly (AC/GT) has no positive impact on the quality of the assembly and sometimes the results are slightly worse. This is due to the fact that even though poly (AC/GT) is frequent, but the quality of reads that contain a poly

Table 3: The improvement rate of NGA50 values for contigs and scaffolds upon the uncorrected data for different EC tools

| Tools                              | D1  | D2  | D3  | D4  | D5  | D6  | D7  | D8  | D9  | AVG |
|------------------------------------|-----|-----|-----|-----|-----|-----|-----|-----|-----|-----|
| Contig NGA50 improvement rate(%)   |     |     |     |     |     |     |     |     |     |     |
| ACE                                | 5   | 55  | -51 | -43 | -44 | -16 | -31 | -23 | -5  | -17 |
| BFC                                | 7   | 74  | 0   | -3  | -24 | 0   | -4  | -7  | -1  | 5   |
| BLESS2                             | -16 | 42  | -53 | -51 | -52 | -27 | -24 | -29 | -15 | -25 |
| BrownieCorrector                   | 23  | 102 | 0   | 3   | 8   | 11  | 3   | 5   | 10  | 18  |
| Karect                             | 15  | 85  | 0   | 6   | -18 | 1   | 6   | 1   | 6   | 11  |
| Reckoner                           | -16 | 18  | -1  | -17 | -27 | -3  | -28 | -16 | -13 | -11 |
| BrownieCorrector+Karect            | 24  | 128 | 0   | 10  | -15 | 11  | 10  | 3   | 15  | 21  |
| Scaffold NGA50 improvement rate(%) |     |     |     |     |     |     |     |     |     |     |
| ACE                                | 7   | 52  | -51 | -42 | -31 | -5  | -35 | -15 | -2  | -14 |
| BFC                                | 8   | 71  | 0   | -3  | -9  | 0   | -5  | 1   | -3  | 7   |
| BLESS2                             | -12 | 40  | -53 | -43 | -39 | -8  | -24 | -21 | -12 | -19 |
| BrownieCorrector                   | 24  | 104 | 0   | 1   | 9   | 12  | 0   | 8   | 14  | 19  |
| Karect                             | 19  | 82  | -1  | 4   | 0   | 1   | 6   | 13  | 7   | 15  |
| Reckoner                           | -15 | 15  | -1  | -21 | -15 | -3  | -30 | -9  | -15 | -10 |
| BrownieCorrector+Karect            | 28  | 126 | -1  | 8   | 5   | 11  | 8   | 15  | 23  | 25  |

(AC/GT) is high, and the assembler can itself handle the associated complexity. We highly suggest the user to use the poly A which is the default  $k$ -mer in the software.

### 5.3 Choice of the number of iterations

In order to find the stable cores of clusters we repeated the clustering multiple times. The default value for the number of iteration is set to 20 in the software. However, we further investigate the quality of assembly results (for D1) when it is set to 1, 5, 10 and 30 as well. Fig. 2 shows how NGA50 of contigs and scaffolds changes for different values of iteration. This picture indicates that using the stable cores after running the clustering multiple times improves the quality of assembly. However, it also shows the accuracy of BrownieCorrector is not much affected by changing this parameter in the range of (5 to 30).

Table 4: Two highly repetitive  $k$ -mers used in this study. The number of corrected and total number of reads in each dataset is compared.

| highly repetitive $k$ -mer | Number of corrected reads | Total number of reads |
|----------------------------|---------------------------|-----------------------|
| R1                         |                           |                       |
| AAAAAAAAAAAAAAAA           | 264 608 (1.96%)           | 13 486 136            |
| CCCCCCCCCCCCCCC            | 12 180 (0.09%)            | 13 486 136            |
| ACACACACACACACA            | 96 542 (0.71%)            | 13 486 136            |
| R2                         |                           |                       |
| AAAAAAAAAAAAAAAA           | 620 500 (1.69%)           | 36 504 800            |
| CCCCCCCCCCCCCCC            | 41 890 (0.11%)            | 36 504 800            |
| ACACACACACACACA            | 202 770 (0.55%)           | 36 504 800            |
| R3                         |                           |                       |
| AAAAAAAAAAAAAAAA           | 198 598 (0.34%)           | 57 721 732            |
| CCCCCCCCCCCCCCC            | 112 908 (0.19%)           | 57 721 732            |
| ACACACACACACACA            | 72 848 (0.12%)            | 57 721 732            |
| R4                         |                           |                       |
| AAAAAAAAAAAAAAAA           | 576 552 (0.91%)           | 63 014 762            |
| CCCCCCCCCCCCCCC            | 138 976 (0.22%)           | 63 014 762            |
| ACACACACACACACA            | 477 950 (0.75%)           | 63 014 762            |
| R5                         |                           |                       |
| AAAAAAAAAAAAAAAA           | 653 028 (0.85%)           | 75 938 276            |
| CCCCCCCCCCCCCCC            | 83 506 (0.10%)            | 75 938 276            |
| ACACACACACACACA            | 486 066 (0.64%)           | 75 938 276            |
| R6                         |                           |                       |
| AAAAAAAAAAAAAAAA           | 571 806 (0.61%)           | 93 429 346            |
| CCCCCCCCCCCCCCC            | 8 256 (0.01%)             | 93 429 346            |
| ACACACACACACACA            | 32 320 (0.03%)            | 93 429 346            |

Table 5: NGA50 of respectively contigs (top) and scaffolds (bottom) assembled by SPAdes before and after error correction. Reads that contain a 15-mer poly (C/G) are corrected by BrownieCorrector.

| Tools            | D1            | D2           | D3           | D4            | D5            | D6            | D7            | D8             | D9            |
|------------------|---------------|--------------|--------------|---------------|---------------|---------------|---------------|----------------|---------------|
| Contig NGA50     |               |              |              |               |               |               |               |                |               |
| Uncorrected      | 10 876        | <b>5 451</b> | 6 325        | <b>50 833</b> | 35 924        | 40 802        | <b>80 752</b> | 85 003         | 65 138        |
| BrownieCorrector | 10 876        | 5 449        | <b>6 438</b> | 50 733        | <b>36 177</b> | <b>40 805</b> | 79 151        | 85 003         | <b>65 469</b> |
| Scaffold NGA50   |               |              |              |               |               |               |               |                |               |
| Uncorrected      | 11 377        | 5 668        | 6 419        | <b>60 714</b> | 59 591        | 41 833        | <b>96 381</b> | 109 785        | 84 659        |
| BrownieCorrector | <b>11 385</b> | 5 668        | <b>6 525</b> | 59 130        | <b>60 500</b> | <b>41 836</b> | 92 852        | <b>110 560</b> | 84 659        |

Table 6: NGA50 of respectively contigs (top) and scaffolds (bottom) assembled by SPAdes before and after error correction. Reads that contain a 15-mer poly (AC/TG) are corrected by BrownieCorrector.

| Tools            | D1            | D2           | D3           | D4            | D5            | D6            | D7            | D8             | D9            |
|------------------|---------------|--------------|--------------|---------------|---------------|---------------|---------------|----------------|---------------|
| Contig NGA50     |               |              |              |               |               |               |               |                |               |
| Uncorrected      | <b>10 876</b> | <b>5 451</b> | <b>6 325</b> | 50 833        | <b>35 924</b> | <b>40 802</b> | <b>80 752</b> | <b>85 003</b>  | <b>65 138</b> |
| BrownieCorrector | 10 762        | 5 391        | <b>6 325</b> | <b>50 834</b> | 35 389        | <b>40 802</b> | 80 712        | 84 581         | <b>65 138</b> |
| Scaffold NGA50   |               |              |              |               |               |               |               |                |               |
| Uncorrected      | <b>11 377</b> | <b>5 668</b> | <b>6 419</b> | <b>60 714</b> | 59 591        | 41 833        | <b>96 381</b> | <b>109 785</b> | <b>84 659</b> |
| BrownieCorrector | 11 270        | 5 621        | <b>6 419</b> | <b>60 714</b> | <b>59 827</b> | <b>41 836</b> | 96 165        | 108 752        | <b>84 659</b> |

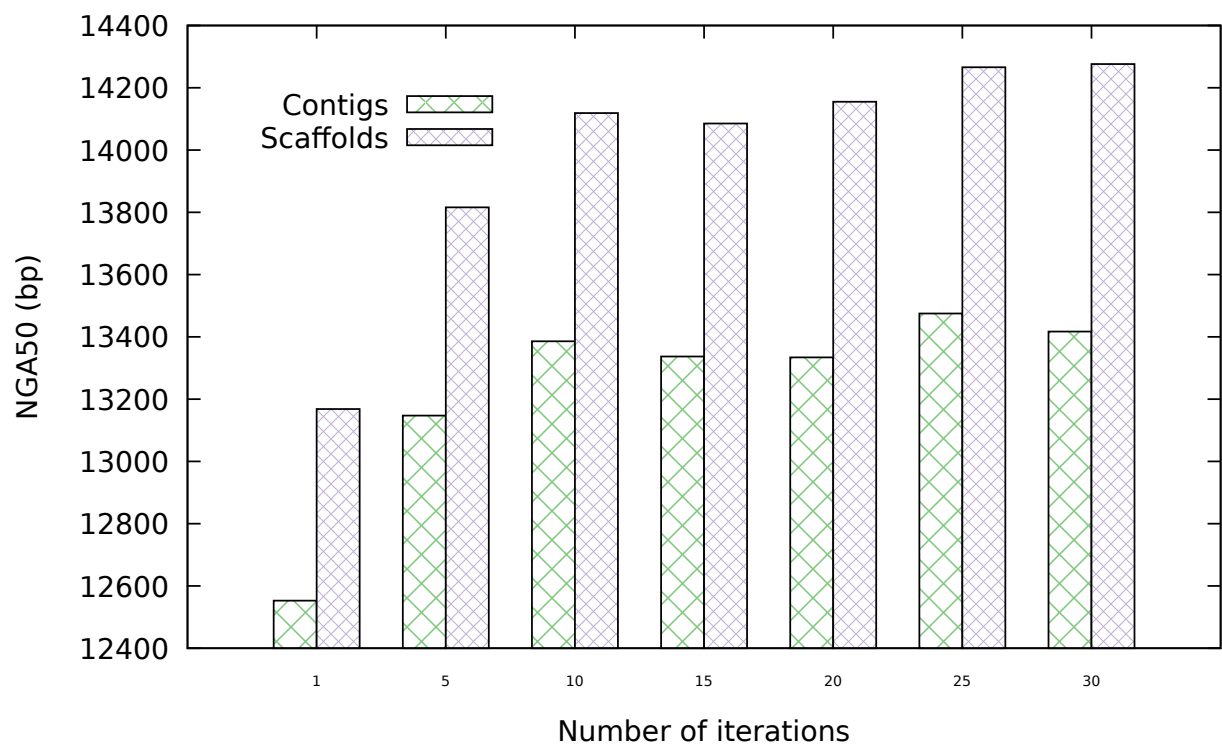

Figure 2: The impact of changing the number of iterations in reads clustering on the quality of assembly in D1(*Homo sapiens* chr. 21).

#### 5.4 Full Quast report (contigs)

This section contains the Quast evaluation report of contigs after assembling each dataset with SPAdes. Error correction by ACE, BFC, BLESS2, Brownie, Karect and Reckoner is performed prior to assembling the reads. The Uncorrected column refers to the quality of contigs without any pre-correction process. The Hybrid column shows the quality of assembly of reads which are corrected jointly by BrownieCorrector and Karect. Default parameter settings are used for Quast, therefore all statistics are based on contigs of size  $\geq 500$  bp.

### 5.4.1 D1

Table 7 contains the Quast report after assembling dataset D1 (*Homo sapiens* Chr. 21) with SPAdes and Fig. 3 shows the corresponding NGAx plot.

Table 7: Assembly quality metrics for D1

| Assembly                    | Uncorrected | ACE         | BFC             | BLESS2             | Hybrid          | Karect      | BrownieCorrector | Reckoner        |
|-----------------------------|-------------|-------------|-----------------|--------------------|-----------------|-------------|------------------|-----------------|
| # contigs (≥ 0 bp)          | 15698       | 17387       | 15294           | 18776              | 16438           | 17247       | 14537            | 21465           |
| # contigs (≥ 1000 bp)       | 3637        | 3501        | 3428            | 4065               | 3035            | 3269        | 3058             | 4218            |
| # contigs (≥ 5000 bp)       | 1989        | 1953        | 1910            | 2065               | 1804            | 1898        | 1802             | 2060            |
| # contigs (≥ 10000 bp)      | 1128        | 1115        | 1113            | 1064               | 1130            | 1126        | 1124             | 1082            |
| # contigs (≥ 25000 bp)      | 239         | 254         | 271             | 189                | 314             | 281         | 321              | 181             |
| # contigs (≥ 50000 bp)      | 24          | 24          | 28              | 11                 | 46              | 34          | 43               | 11              |
| Total length (≥ 0 bp)       | 34383421    | 34462802    | 34371704        | 34340929           | 34484783        | 34541537    | 34323631         | <b>34746509</b> |
| Total length (≥ 1000 bp)    | 32610876    | 32607223    | 32648129        | 32311651           | 32677840        | 32667335    | <b>32678726</b>  | 32480570        |
| Total length (≥ 5000 bp)    | 28418343    | 28545565    | 28787065        | 27096397           | <b>29533788</b> | 29142408    | 29499002         | 26912697        |
| Total length (≥ 10000 bp)   | 22265626    | 22534041    | 23076297        | 19919516           | <b>24659630</b> | 23596575    | 24593042         | 19861301        |
| Total length (≥ 25000 bp)   | 8482791     | 9017654     | 9921318         | 6494787            | 11802375        | 10261128    | <b>12015621</b>  | 6201468         |
| Total length (≥ 50000 bp)   | 1439339     | 1504015     | 1767700         | 698377             | <b>2815229</b>  | 2121583     | 2742260          | 674634          |
| # contigs                   | 4209        | 4018        | 3990            | 4674               | 3520            | 3776        | 3540             | 4874            |
| Largest contig              | 82702       | 98568       | <b>109124</b>   | 82889              | 88924           | 92853       | 98722            | 80324           |
| Total length                | 33019875    | 32976721    | <b>33047634</b> | 32752359           | 33022607        | 33030548    | 33022956         | 32950991        |
| Reference length            | 40988574    | 40988574    | 40988574        | 40988574           | 40988574        | 40988574    | 40988574         | 40988574        |
| GC (%)                      | 40.73       | 40.75       | 40.73           | 40.67              | 40.76           | 40.75       | 40.75            | 40.62           |
| Reference GC (%)            | 40.93       | 40.93       | 40.93           | 40.93              | 40.93           | 40.93       | 40.93            | 40.93           |
| N50                         | 15054       | 15720       | 16310           | 12767              | 18515           | 17064       | <b>18523</b>     | 12479           |
| NG50                        | 11384       | 11943       | 12348           | 9548               | <b>13981</b>    | 12994       | 13969            | 9475            |
| N75                         | 7816        | 8068        | 8352            | 6681               | <b>9864</b>     | 8990        | 9813             | 6589            |
| NG75                        | 2807        | 2990        | 2929            | 2365               | <b>3519</b>     | 3269        | 3491             | 2377            |
| L50                         | 659         | 638         | 603             | 753                | 534             | 587         | <b>532</b>       | 780             |
| LG50                        | 963         | 929         | 881             | 1123               | 781             | 854         | <b>779</b>       | 1148            |
| L75                         | 1411        | 1361        | 1300            | 1629               | <b>1141</b>     | 1251        | 1142             | 1679            |
| LG75                        | 2596        | 2509        | 2412            | 3101               | <b>2093</b>     | 2291        | 2101             | 3146            |
| # misassemblies             | 172         | 146         | 185             | 172                | 109             | <b>100</b>  | 139              | 145             |
| # misassembled contigs      | 163         | 134         | 168             | 163                | 102             | <b>90</b>   | 130              | 140             |
| Misassembled contigs length | 2744756     | 2266007     | 3413239         | 2579081            | 2163845         | 2066353     | 2696928          | <b>2019536</b>  |
| # local misassemblies       | 117         | <b>87</b>   | 100             | 93                 | 89              | 90          | 114              | 93              |
| # unaligned mis. contigs    | 0           | 0           | 0               | 0                  | 0               | 0           | 0                | 0               |
| # unaligned contigs         | 69 + 7 part | 60 + 7 part | 72 + 7 part     | <b>47 + 6 part</b> | 65 + 6 part     | 63 + 4 part | 70 + 7 part      | 64 + 5 part     |
| Unaligned length            | 75440       | 69319       | 81177           | <b>52669</b>       | 70161           | 68430       | 76887            | 67237           |
| Genome fraction (%)         | 80.057      | 79.980      | 80.098          | 79.544             | <b>80.222</b>   | 80.191      | 80.200           | 79.862          |
| Duplication ratio           | 1.004       | 1.004       | 1.004           | 1.003              | <b>1.002</b>    | 1.003       | <b>1.002</b>     | 1.005           |
| # N's per 100 kbp           | 0.00        | 0.00        | 0.00            | 0.00               | 0.00            | 0.00        | 0.00             | 0.00            |
| # mismatches per 100 kbp    | 166.59      | 163.62      | 161.90          | 162.96             | <b>152.72</b>   | 155.00      | 157.31           | 158.16          |
| # indels per 100 kbp        | 36.21       | 36.13       | 35.63           | 34.84              | 35.83           | 35.64       | 36.50            | <b>33.08</b>    |
| Largest alignment           | 82666       | 98563       | 96583           | 80972              | 85895           | 92848       | <b>98722</b>     | 80324           |
| Total aligned length        | 32887394    | 32846124    | 32913718        | 32658156           | <b>32929390</b> | 32922661    | 32921082         | 32800027        |
| NA50                        | 14357       | 15191       | 15483           | 12278              | <b>17934</b>    | 16481       | <b>17934</b>     | 12005           |
| NGA50                       | 10876       | 11375       | 11672           | 9183               | <b>13526</b>    | 12507       | 13334            | 9154            |
| NA75                        | 7513        | 7758        | 7898            | 6399               | <b>9446</b>     | 8584        | 9312             | 6292            |
| NGA75                       | 2672        | 2751        | 2743            | 2221               | <b>3382</b>     | 3136        | 3344             | 2211            |
| LA50                        | 687         | 662         | 634             | 781                | <b>552</b>      | 607         | 553              | 804             |
| LGA50                       | 1006        | 966         | 931             | 1168               | <b>808</b>      | 883         | 812              | 1185            |
| LA75                        | 1477        | 1419        | 1375            | 1696               | <b>1185</b>     | 1294        | 1194             | 1739            |
| LGA75                       | 2738        | 2629        | 2562            | 3245               | <b>2178</b>     | 2376        | 2204             | 3280            |



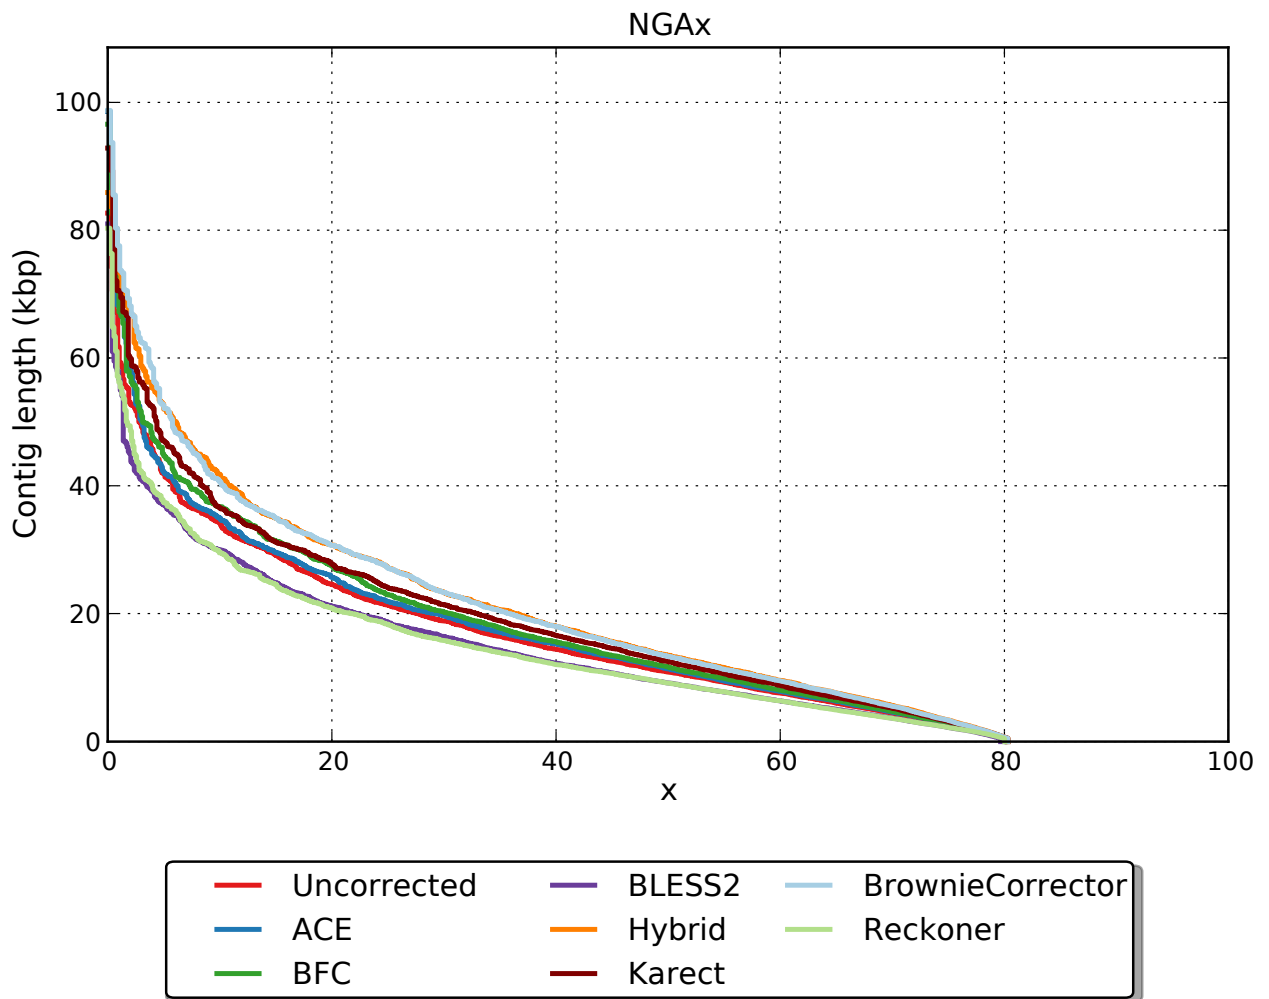

Figure 3: SPAdes assembly results for dataset D1 (*Homo sapiens* Chr. 21) for both uncorrected and corrected data. Contigs with length  $NGAx$  or larger produce  $x\%$  of the genome.

## 5.4.2 D2

Table 8 contains the Quast report after assembling dataset D2 (*Homo sapiens* Chr. 14) with SPAdes. Fig. 4 shows the corresponding NGAx plot.

Table 8: Assembly quality metrics for D2

| Assembly                        | Uncorrected        | ACE          | BFC          | BLESS2       | Hybrid          | Karect       | BrownieCorrector | Reckoner     |
|---------------------------------|--------------------|--------------|--------------|--------------|-----------------|--------------|------------------|--------------|
| # contigs ( $\geq 0$ bp)        | 412807             | 64078        | 61489        | 65782        | 55134           | 59219        | 86196            | 83030        |
| # contigs ( $\geq 1000$ bp)     | 15216              | 10449        | 9716         | 11408        | 7780            | 9167         | 8834             | 13090        |
| # contigs ( $\geq 5000$ bp)     | 5457               | 5259         | 5117         | 5438         | 4672            | 5027         | 5035             | 5486         |
| # contigs ( $\geq 10000$ bp)    | 2048               | 2692         | 2771         | 2610         | 2797            | 2735         | 2785             | 2406         |
| # contigs ( $\geq 25000$ bp)    | 165                | 493          | 589          | 388          | 787             | 642          | 665              | 286          |
| # contigs ( $\geq 50000$ bp)    | 3                  | 40           | 56           | 25           | 123             | 68           | 78               | 13           |
| Total length ( $\geq 0$ bp)     | <b>111701232</b>   | 88494866     | 88685751     | 88477590     | 88259815        | 88449116     | 90604563         | 89660410     |
| Total length ( $\geq 1000$ bp)  | 81314165           | 82917065     | 83298061     | 82563788     | <b>83582377</b> | 83366588     | 83452630         | 82221160     |
| Total length ( $\geq 5000$ bp)  | 56548179           | 69077685     | 71125131     | 66852992     | <b>75198734</b> | 72219844     | 73292947         | 62595655     |
| Total length ( $\geq 10000$ bp) | 32454389           | 50611835     | 54160580     | 46552182     | <b>61611743</b> | 55675021     | 57064546         | 40852265     |
| Total length ( $\geq 25000$ bp) | 5145723            | 16921012     | 20768408     | 13067553     | <b>30030862</b> | 22904577     | 24067360         | 9419772      |
| Total length ( $\geq 50000$ bp) | 174274             | 2388255      | 3302981      | 1588265      | <b>7758002</b>  | 4107399      | 4809154          | 773905       |
| # contigs                       | 18340              | 11869        | 10998        | 13082        | 8702            | 10313        | 9907             | 15287        |
| Largest contig                  | 68123              | 85393        | 80374        | 97813        | <b>102135</b>   | 94125        | 99626            | 81231        |
| Total length                    | 83591797           | 83953943     | 84236486     | 83787039     | <b>84247240</b> | 84198056     | 84227171         | 83825716     |
| Reference length                | 107349540          | 107349540    | 107349540    | 107349540    | 107349540       | 107349540    | 107349540        | 107349540    |
| GC (%)                          | 40.66              | 40.72        | 40.71        | 40.68        | 40.73           | 40.72        | 40.73            | 40.48        |
| Reference GC (%)                | 40.89              | 40.89        | 40.89        | 40.89        | 40.89           | 40.89        | 40.89            | 40.89        |
| N50                             | 7859               | 12805        | 14093        | 11414        | <b>18281</b>    | 15129        | 15504            | 9663         |
| NG50                            | 5506               | 9159         | 10166        | 8182         | <b>13099</b>    | 10719        | 11194            | 6836         |
| N75                             | 4000               | 6649         | 7403         | 5939         | <b>9387</b>     | 7739         | 8062             | 4939         |
| NG75                            | 1167               | 1888         | 2116         | 1669         | <b>2743</b>     | 2260         | 2380             | 1442         |
| L50                             | 3104               | 1927         | 1751         | 2173         | <b>1355</b>     | 1633         | 1590             | 2514         |
| LG50                            | 4910               | 3012         | 2723         | 3395         | <b>2103</b>     | 2542         | 2466             | 3958         |
| L75                             | 6828               | 4199         | 3815         | 4703         | <b>2960</b>     | 3583         | 3463             | 5542         |
| LG75                            | 14473              | 8756         | 7888         | 9852         | <b>6063</b>     | 7382         | 7039             | 11683        |
| # misassemblies                 | 119                | 820          | 640          | 716          | 353             | 496          | <b>112</b>       | 689          |
| # misassembled contigs          | 119                | 759          | 612          | 676          | 336             | 469          | <b>110</b>       | 660          |
| Misassembled contigs length     | <b>985057</b>      | 10604473     | 9133094      | 8318230      | 6946313         | 7769701      | 2110750          | 6863900      |
| # local misassemblies           | 44                 | 41           | 49           | 54           | 40              | 42           | <b>38</b>        | 44           |
| # unaligned mis. contigs        | 0                  | 0            | 0            | 0            | 0               | 0            | 0                | 0            |
| # unaligned contigs             | <b>13 + 6 part</b> | 13 + 26 part | 17 + 19 part | 19 + 19 part | 16 + 13 part    | 15 + 19 part | 16 + 5 part      | 19 + 24 part |
| Unaligned length                | 16477              | 34851        | 30844        | 35033        | 26953           | 28976        | <b>16274</b>     | 38607        |
| Genome fraction (%)             | 77.424             | 77.785       | 78.122       | 77.703       | <b>78.326</b>   | 78.150       | 78.312           | 77.521       |
| Duplication ratio               | 1.006              | 1.005        | 1.004        | 1.004        | <b>1.002</b>    | 1.003        | <b>1.002</b>     | 1.007        |
| # N's per 100 kbp               | 0.00               | 0.00         | 0.00         | 0.00         | 0.00            | 0.00         | 0.00             | 0.00         |
| # mismatches per 100 kbp        | 112.22             | 126.99       | 119.91       | 125.01       | 105.67          | 114.90       | <b>101.91</b>    | 118.25       |
| # indels per 100 kbp            | 20.59              | 21.56        | 21.52        | 20.54        | 21.48           | 21.23        | 20.81            | <b>17.42</b> |
| Largest alignment               | 68123              | 81510        | 80321        | 93310        | <b>102135</b>   | 92098        | 99626            | 65458        |
| Total aligned length            | 83425919           | 83704957     | 84047956     | 83625967     | <b>84183013</b> | 84039499     | 84171283         | 83422870     |
| NA50                            | 7792               | 11786        | 13177        | 10772        | <b>17429</b>    | 14288        | 15290            | 9245         |
| NGA50                           | 5451               | 8475         | 9488         | 7737         | <b>12409</b>    | 10103        | 11015            | 6440         |
| NA75                            | 3951               | 6058         | 6829         | 5537         | <b>8948</b>     | 7315         | 7985             | 4624         |
| NGA75                           | 1121               | 1693         | 1929         | 1531         | <b>2573</b>     | 2108         | 2345             | 1288         |
| LA50                            | 3124               | 2055         | 1841         | 2279         | <b>1410</b>     | 1710         | 1610             | 2616         |
| LGA50                           | 4948               | 3230         | 2878         | 3569         | <b>2192</b>     | 2675         | 2498             | 4141         |
| LA75                            | 6888               | 4522         | 4049         | 4968         | <b>3090</b>     | 3776         | 3507             | 5822         |
| LGA75                           | 14685              | 9514         | 8458         | 10506        | <b>6350</b>     | 7821         | 7138             | 12474        |

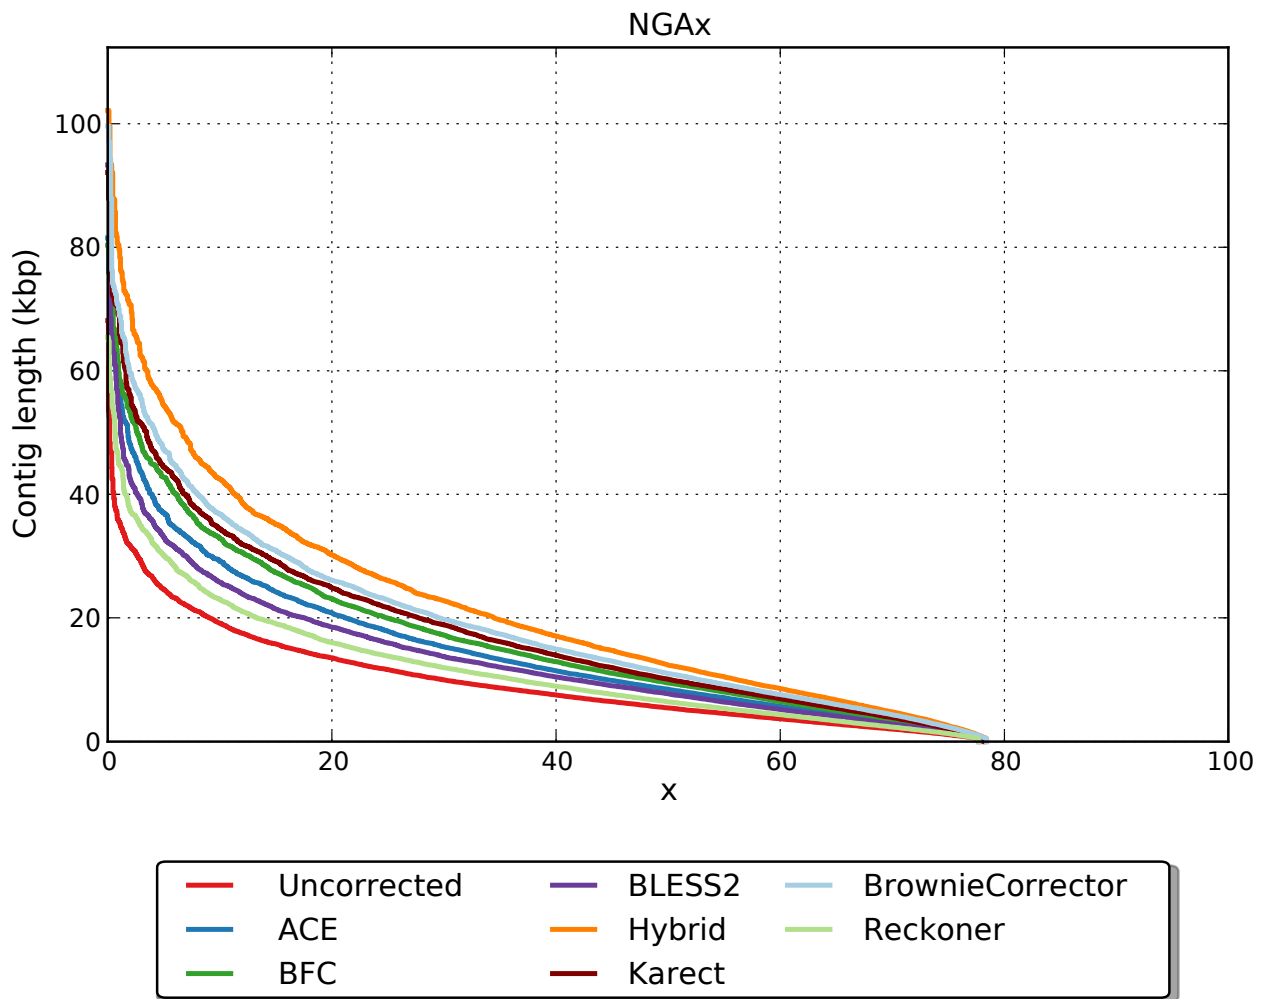

Figure 4: SPAdes assembly results for dataset D2 (*Homo sapiens* Chr. 14) for both uncorrected and corrected data. Contigs with length  $NGAx$  or larger produce  $x\%$  of the genome.

### 5.4.3 D3

Table 9 contains the Quast report after assembling dataset D3 (*C. elegans*) with SPAdes. Fig. 5 shows the corresponding NGAx plot.

Table 9: Assembly quality metrics for D3

| Assembly                    | Uncorrected      | ACE                    | BFC             | BLESS2          | Hybrid         | Karect         | BrownieCorrector | Reckoner         |
|-----------------------------|------------------|------------------------|-----------------|-----------------|----------------|----------------|------------------|------------------|
| # contigs (≥ 0 bp)          | 91054            | 108559                 | 91618           | 117149          | 91976          | 91798          | 91152            | 93938            |
| # contigs (≥ 1000 bp)       | 20133            | 26210                  | 20179           | 28117           | 20190          | 20176          | 20128            | 20188            |
| # contigs (≥ 5000 bp)       | 6202             | 5193                   | 6215            | 4644            | 6253           | 6247           | 6201             | 6189             |
| # contigs (≥ 10000 bp)      | 2336             | 1170                   | 2330            | 909             | 2368           | 2364           | 2337             | 2333             |
| # contigs (≥ 25000 bp)      | 280              | 120                    | 296             | 70              | 300            | 302            | 280              | 286              |
| # contigs (≥ 50000 bp)      | 65               | 22                     | 65              | 7               | 56             | 56             | 65               | 63               |
| Total length (≥ 0 bp)       | 116361844        | 112509995              | 116388634       | 112348944       | 116081137      | 116062821      | 116365458        | <b>116425966</b> |
| Total length (≥ 1000 bp)    | <b>103913389</b> | 95599801               | 103773800       | 92664921        | 103437334      | 103440805      | 103912841        | 103655165        |
| Total length (≥ 5000 bp)    | 70663972         | 46557489               | 70526082        | 38965131        | 70281028       | 70250754       | <b>70666015</b>  | 70314693         |
| Total length (≥ 10000 bp)   | 43594203         | 19178514               | 43288714        | 13815325        | 42981410       | 42929158       | <b>43606770</b>  | 43257998         |
| Total length (≥ 25000 bp)   | 13566746         | 5009175                | <b>13613721</b> | 2460232         | 12782149       | 12861875       | 13554231         | 13527463         |
| Total length (≥ 50000 bp)   | 6657935          | 1656998                | 6061255         | 396865          | 4955692        | 4959945        | <b>6657938</b>   | 6351558          |
| # contigs                   | 26593            | 36711                  | 26767           | 40384           | 26788          | 26761          | 26589            | 26789            |
| Largest contig              | <b>244078</b>    | 128379                 | 240394          | 66400           | 238991         | 238991         | <b>244078</b>    | 240969           |
| Total length                | 108572808        | 103180601              | 108528629       | 101465829       | 108202583      | 108197037      | <b>108573218</b> | 108420265        |
| Reference length            | 100286070        | 100286070              | 100286070       | 100286070       | 100286070      | 100286070      | 100286070        | 100286070        |
| GC (%)                      | 38.47            | 38.30                  | 38.46           | 38.20           | 38.41          | 38.41          | 38.47            | 38.46            |
| Reference GC (%)            | 35.44            | 35.44                  | 35.44           | 35.44           | 35.44          | 35.44          | 35.44            | 35.44            |
| N50                         | 7659             | 4466                   | 7625            | 3834            | 7644           | 7654           | <b>7663</b>      | 7620             |
| NG50                        | 8517             | 4608                   | 8496            | 3887            | 8464           | 8474           | <b>8522</b>      | 8483             |
| N75                         | 3546             | 2270                   | 3525            | 1987            | 3516           | 3524           | <b>3547</b>      | 3515             |
| NG75                        | <b>4365</b>      | 2428                   | 4325            | 2039            | 4295           | 4296           | <b>4365</b>      | 4306             |
| L50                         | 3560             | 6259                   | 3588            | 7341            | 3641           | 3641           | <b>3559</b>      | 3588             |
| LG50                        | 3047             | 5940                   | 3075            | 7189            | 3148           | 3149           | <b>3046</b>      | 3082             |
| L75                         | 8761             | 14393                  | 8811            | 16553           | 8852           | 8849           | <b>8759</b>      | 8818             |
| LG75                        | 7178             | 13468                  | 7224            | 16114           | 7320           | 7320           | <b>7176</b>      | 7247             |
| # misassemblies             | 1232             | 4500                   | 1194            | 1484            | <b>1190</b>    | 1220           | 1233             | 1219             |
| # misassembled contigs      | 1178             | 4040                   | 1142            | 1435            | <b>1132</b>    | 1160           | 1180             | 1165             |
| Misassembled contigs length | 8966387          | 18042488               | 8729971         | <b>5420189</b>  | 8771615        | 8913241        | 8958822          | 8888451          |
| # local misassemblies       | 257              | 211                    | 253             | <b>202</b>      | 269            | 271            | 256              | 273              |
| # unaligned mis. contigs    | 3                | 7                      | 3               | <b>2</b>        | <b>2</b>       | <b>2</b>       | 3                | <b>2</b>         |
| # unaligned contigs         | 4921 + 67 part   | <b>4196 + 126 part</b> | 4969 + 53 part  | 4590 + 57 part  | 5035 + 56 part | 5035 + 57 part | 4922 + 67 part   | 4955 + 64 part   |
| Unaligned length            | 16560504         | 14110799               | 16496602        | <b>13653429</b> | 16286086       | 16288035       | 16560915         | 16494872         |
| Genome fraction (%)         | 91.300           | 86.965                 | <b>91.318</b>   | 87.248          | 91.229         | 91.231         | 91.302           | 91.222           |
| Duplication ratio           | 1.005            | 1.021                  | 1.005           | <b>1.004</b>    | 1.005          | 1.005          | 1.005            | 1.005            |
| # N's per 100 kbp           | 0.00             | 0.00                   | 0.00            | 0.00            | 0.00           | 0.00           | 0.00             | 0.00             |
| # mismatches per 100 kbp    | 23.69            | 105.56                 | <b>23.11</b>    | 27.41           | 23.40          | 23.35          | 23.58            | 24.24            |
| # indels per 100 kbp        | 5.88             | 18.20                  | <b>5.79</b>     | 6.64            | 5.90           | 5.94           | 5.86             | 5.94             |
| Largest alignment           | 54032            | 27212                  | 54032           | 27155           | <b>64367</b>   | <b>64367</b>   | 54032            | 54032            |
| Total aligned length        | 91822498         | 87395766               | <b>91852586</b> | 87657662        | 91748458       | 91739544       | 91822652         | 91746223         |
| NA50                        | 5612             | 2996                   | 5598            | 2925            | <b>5613</b>    | 5609           | 5610             | 5561             |
| NGA50                       | 6325             | 3116                   | 6307            | 2969            | 6297           | 6295           | <b>6328</b>      | 6281             |
| NA75                        | 1916             | 1148                   | 1915            | 1229            | <b>1938</b>    | <b>1938</b>    | 1918             | 1904             |
| NGA75                       | <b>2713</b>      | 1300                   | 2702            | 1282            | 2688           | 2688           | <b>2713</b>      | 2674             |
| LA50                        | 5036             | 9332                   | 5045            | 9570            | <b>5018</b>    | 5019           | 5035             | 5066             |
| LGA50                       | 4341             | 8858                   | 4351            | 9370            | 4352           | 4353           | <b>4340</b>      | 4379             |
| LA75                        | 13065            | 22879                  | 13084           | 22740           | <b>12996</b>   | <b>12996</b>   | 13062            | 13147            |
| LGA75                       | 10358            | 21103                  | 10388           | 22035           | 10412          | 10415          | <b>10356</b>     | 10463            |

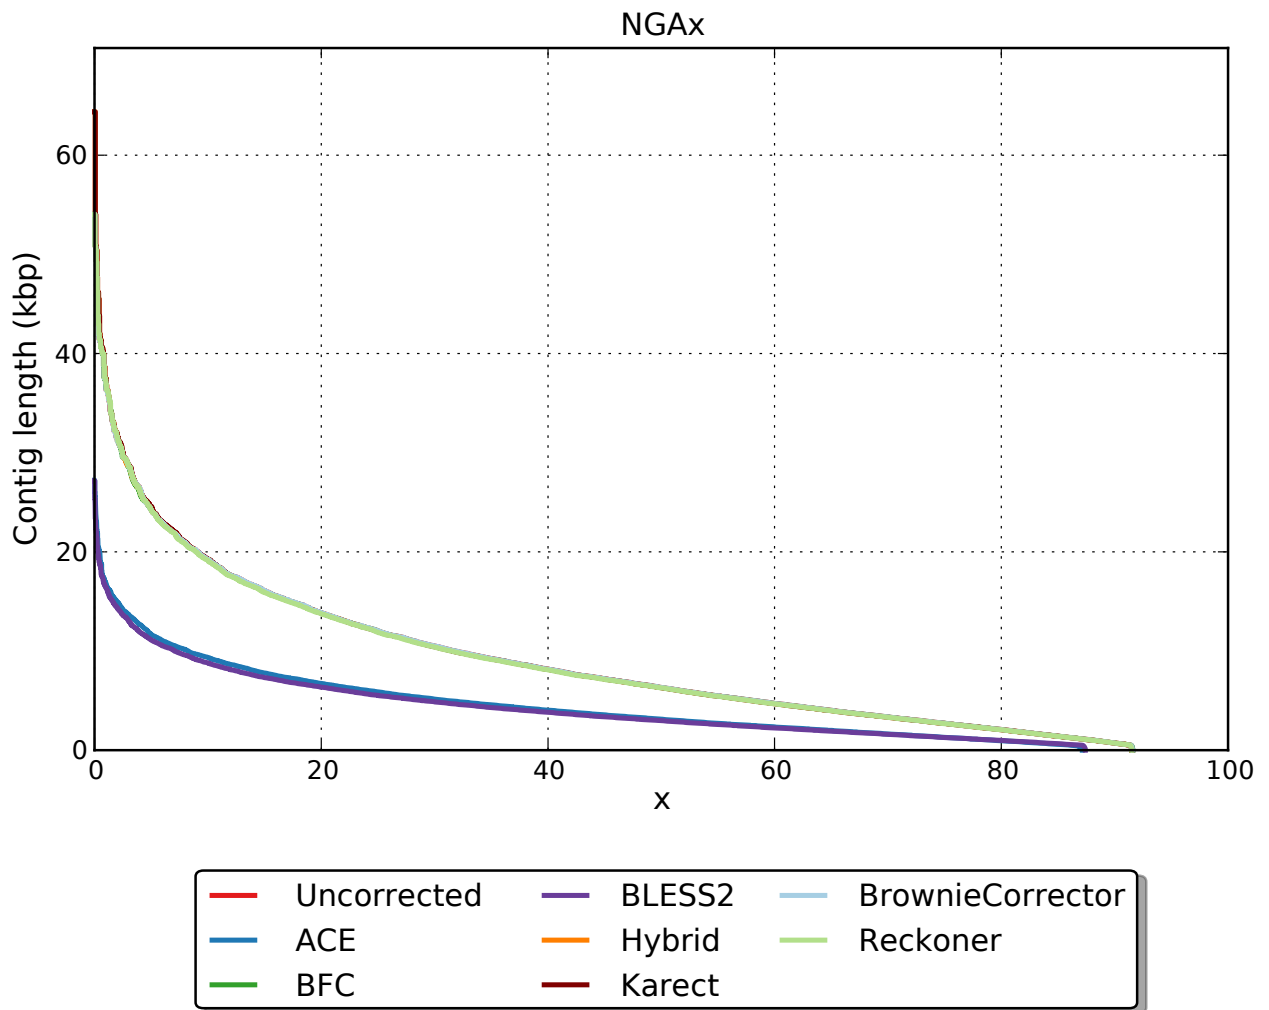

Figure 5: SPAdes assembly results for dataset D3 (*C. elegans*) for both uncorrected and corrected data. Contigs with length  $NGAx$  or larger produce  $x\%$  of the genome.

#### 5.4.4 D4

Table 10 contains the Quast report after assembling dataset D4 (*D. melanogaster*) with SPAdes. Fig. 6 shows the corresponding NGAx plot.

Table 10: Assembly quality metrics for D4

| Assembly                    | Uncorrected      | ACE             | BFC             | BLESS2                 | Hybrid           | Karect           | BrownieCorrector | Reckoner         |
|-----------------------------|------------------|-----------------|-----------------|------------------------|------------------|------------------|------------------|------------------|
| # contigs (≥ 0 bp)          | 94428            | 98953           | 92673           | 98200                  | 92770            | 93552            | 94263            | 102274           |
| # contigs (≥ 1000 bp)       | 5744             | 7518            | 5816            | 8256                   | 5478             | 5570             | 5641             | 6469             |
| # contigs (≥ 5000 bp)       | 2927             | 4348            | 3019            | 4686                   | 2685             | 2771             | 2859             | 3415             |
| # contigs (≥ 10000 bp)      | 2228             | 3088            | 2286            | 3275                   | 2064             | 2129             | 2166             | 2517             |
| # contigs (≥ 25000 bp)      | 1289             | 1412            | 1321            | 1366                   | 1250             | 1280             | 1272             | 1383             |
| # contigs (≥ 50000 bp)      | 687              | 524             | 674             | 455                    | 687              | 695              | 690              | 656              |
| Total length (≥ 0 bp)       | 130002600        | 128372226       | 129827421       | 127011744              | 129810748        | 129881140        | 129985751        | <b>130506403</b> |
| Total length (≥ 1000 bp)    | 119818544        | 118251920       | 119812405       | 116972812              | 119873419        | <b>119877304</b> | 119808428        | 119794237        |
| Total length (≥ 5000 bp)    | 113581978        | 110643148       | 113604067       | 108274776              | <b>113773726</b> | 113762300        | 113688120        | 112852066        |
| Total length (≥ 10000 bp)   | 108530954        | 101505638       | 108274117       | 98172191               | <b>109260361</b> | 109119112        | 108675878        | 106389897        |
| Total length (≥ 25000 bp)   | 93186659         | 74193597        | 92453290        | 67343513               | <b>95998464</b>  | 95254278         | 94026163         | 88095244         |
| Total length (≥ 50000 bp)   | 71303295         | 42715781        | 69206434        | 35471350               | <b>75528880</b>  | 73949504         | 72922308         | 62048435         |
| # contigs                   | 8394             | 9886            | 8486            | 10424                  | 8037             | 8145             | 8281             | 9166             |
| Largest contig              | 481990           | 333642          | 481989          | 287346                 | 517988           | <b>517989</b>    | 481989           | 454387           |
| Total length                | 121670559        | 119897165       | 121671950       | 118480841              | 121661557        | <b>121679265</b> | 121652919        | 121676103        |
| Reference length            | 120381546        | 120381546       | 120381546       | 120381546              | 120381546        | 120381546        | 120381546        | 120381546        |
| GC (%)                      | 42.57            | 42.53           | 42.57           | 42.52                  | 42.58            | 42.58            | 42.57            | 42.55            |
| Reference GC (%)            | 42.42            | 42.42           | 42.42           | 42.42                  | 42.42            | 42.42            | 42.42            | 42.42            |
| N50                         | 65546            | 35232           | 61819           | 30326                  | <b>75991</b>     | 71129            | 69567            | 51134            |
| NG50                        | 66349            | 35003           | 62540           | 29666                  | <b>76873</b>     | 72000            | 70449            | 52030            |
| N75                         | 27402            | 16276           | 26503           | 14275                  | <b>31163</b>     | 29955            | 28393            | 21974            |
| NG75                        | 28467            | 16087           | 27640           | 13542                  | <b>32518</b>     | 31195            | 29583            | 22982            |
| L50                         | 505              | 935             | 524             | 1071                   | <b>446</b>       | 473              | 485              | 633              |
| LG50                        | 496              | 942             | 514             | 1103                   | <b>438</b>       | 464              | 476              | 620              |
| L75                         | 1216             | 2191            | 1275            | 2496                   | <b>1082</b>      | 1136             | 1169             | 1518             |
| LG75                        | 1181             | 2214            | 1239            | 2599                   | <b>1052</b>      | 1104             | 1136             | 1475             |
| # misassemblies             | 814              | 964             | 829             | 997                    | 804              | <b>799</b>       | 805              | 879              |
| # misassembled contigs      | 635              | 820             | 650             | 870                    | <b>623</b>       | 628              | 629              | 705              |
| Misassembled contigs length | 43763416         | 31185704        | 43389755        | <b>29155670</b>        | 47975869         | 45770362         | 44692094         | 41789688         |
| # local misassemblies       | 1310             | <b>1248</b>     | 1307            | 1268                   | 1292             | 1298             | 1300             | 1321             |
| # unaligned mis. contigs    | 28               | <b>19</b>       | 27              | 22                     | 31               | 31               | 28               | 21               |
| # unaligned contigs         | 3858 + 378 part  | 2942 + 430 part | 3844 + 384 part | <b>2440 + 373 part</b> | 3824 + 384 part  | 3840 + 373 part  | 3852 + 378 part  | 3853 + 373 part  |
| Unaligned length            | 8132812          | 6534991         | 8141896         | <b>5455940</b>         | 8172885          | 8173915          | 8132689          | 8117761          |
| Genome fraction (%)         | 93.913           | 93.622          | 93.907          | 93.481                 | 93.915           | <b>93.916</b>    | 93.910           | 93.890           |
| Duplication ratio           | <b>1.004</b>     | 1.006           | <b>1.004</b>    | <b>1.004</b>           | <b>1.004</b>     | <b>1.004</b>     | <b>1.004</b>     | 1.005            |
| # N's per 100 kbp           | 0.00             | 0.00            | 0.00            | 0.00                   | 0.00             | 0.00             | 0.00             | 0.00             |
| # mismatches per 100 kbp    | 551.02           | 561.24          | 551.22          | 560.94                 | <b>548.74</b>    | 549.34           | 548.84           | 550.02           |
| # indels per 100 kbp        | 131.61           | 133.42          | 131.69          | 132.59                 | 131.78           | 131.70           | 131.41           | <b>130.95</b>    |
| Largest alignment           | 406513           | 188221          | 280215          | 167357                 | <b>428481</b>    | <b>428481</b>    | 406512           | 367383           |
| Total aligned length        | <b>113196867</b> | 112830607       | 113186685       | 112666190              | 113178942        | 113185629        | 113187949        | 113182400        |
| NA50                        | 50135            | 29320           | 48237           | 25498                  | <b>55055</b>     | 53564            | 51322            | 41401            |
| NGA50                       | 50833            | 29126           | 49089           | 25133                  | <b>56046</b>     | 54106            | 52152            | 41977            |
| NA75                        | 21271            | 13471           | 20789           | 12059                  | <b>23983</b>     | 23202            | 22189            | 17553            |
| NGA75                       | 22149            | 13335           | 21467           | 11383                  | <b>24872</b>     | 23983            | 22983            | 18369            |
| LA50                        | 656              | 1110            | 680             | 1263                   | <b>600</b>       | 623              | 639              | 800              |
| LGA50                       | 643              | 1119            | 667             | 1300                   | <b>588</b>       | 611              | 627              | 785              |
| LA75                        | 1573             | 2616            | 1635            | 2929                   | <b>1429</b>      | 1479             | 1527             | 1913             |
| LGA75                       | 1529             | 2643            | 1589            | 3050                   | <b>1390</b>      | 1437             | 1484             | 1859             |

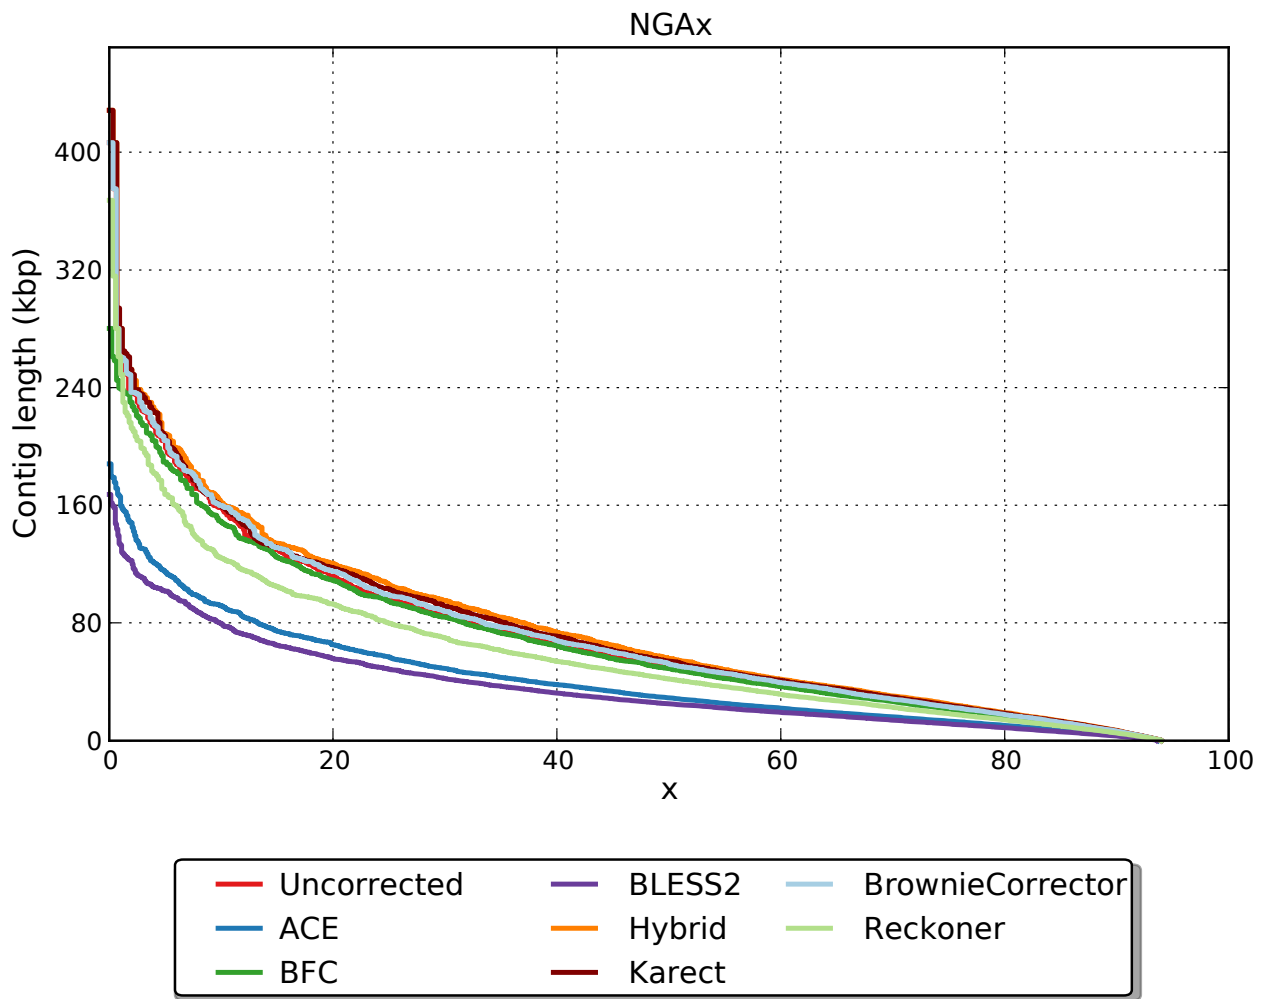

Figure 6: SPAdes assembly results for dataset D4 (*D. melanogaster*) for both uncorrected and corrected data. Contigs with length  $NGAx$  or larger produce  $x\%$  of the genome.

### 5.4.5 D5

Table 11 contains the Quast report after assembling dataset D5 (*D. melanogaster*) with SPAdes. Fig. 7 shows the corresponding NGAx plot.

Table 11: Assembly quality metrics for D5

| Assembly                        | Uncorrected     | ACE             | BFC             | BLESS2                 | Hybrid          | Karect          | BrownieCorrector | Reckoner         |
|---------------------------------|-----------------|-----------------|-----------------|------------------------|-----------------|-----------------|------------------|------------------|
| # contigs ( $\geq 0$ bp)        | 170491          | 218463          | 192792          | 204579                 | 188520          | 189526          | 170354           | 224879           |
| # contigs ( $\geq 1000$ bp)     | 7103            | 10411           | 8931            | 11456                  | 8433            | 8613            | 6826             | 9131             |
| # contigs ( $\geq 5000$ bp)     | 3782            | 5247            | 4591            | 5573                   | 4294            | 4399            | 3605             | 4692             |
| # contigs ( $\geq 10000$ bp)    | 2659            | 3014            | 2901            | 3072                   | 2741            | 2794            | 2557             | 2928             |
| # contigs ( $\geq 25000$ bp)    | 1336            | 1059            | 1226            | 958                    | 1196            | 1203            | 1329             | 1217             |
| # contigs ( $\geq 50000$ bp)    | 575             | 353             | 469             | 321                    | 505             | 502             | 595              | 462              |
| Total length ( $\geq 0$ bp)     | 136008271       | 136884556       | 137701577       | 135338694              | 137359979       | 137407270       | 136022594        | <b>139938723</b> |
| Total length ( $\geq 1000$ bp)  | 118770197       | 115965322       | 118413811       | 115640342              | 118358084       | 118349944       | <b>118780111</b> | 118408852        |
| Total length ( $\geq 5000$ bp)  | 110806731       | 102620615       | 107643770       | 100398087              | 108148059       | 107936808       | <b>111106120</b> | 107416341        |
| Total length ( $\geq 10000$ bp) | 102774604       | 86665062        | 95540225        | 82570772               | 97010422        | 96455953        | <b>103631979</b> | 94709945         |
| Total length ( $\geq 25000$ bp) | 81170209        | 55974685        | 68911764        | 49661452               | 72438499        | 71191324        | <b>83690560</b>  | 67424844         |
| Total length ( $\geq 50000$ bp) | 54276219        | 31966506        | 42454776        | 27765715               | 48170727        | 46747732        | <b>57723562</b>  | 41149200         |
| # contigs                       | 9227            | 12936           | 11267           | 13893                  | 10631           | 10821           | 8939             | 1501             |
| Largest contig                  | 535439          | <b>579123</b>   | 479301          | 348825                 | 579114          | 459363          | 579114           | 330198           |
| Total length                    | 120260659       | 117783200       | 120069086       | 117402937              | 119916284       | 119916237       | <b>120263583</b> | 120090128        |
| Reference length                | 120381546       | 120381546       | 120381546       | 120381546              | 120381546       | 120381546       | 120381546        | 120381546        |
| GC (%)                          | 42.42           | 42.52           | 42.43           | 42.53                  | 42.44           | 42.43           | 42.42            | 42.42            |
| Reference GC (%)                | 42.42           | 42.42           | 42.42           | 42.42                  | 42.42           | 42.42           | 42.42            | 42.42            |
| N50                             | 43681           | 23183           | 31663           | 19964                  | 36541           | 34845           | <b>47564</b>     | 30523            |
| NG50                            | 43568           | 22418           | 31484           | 19004                  | 36446           | 34551           | <b>47534</b>     | 30359            |
| N75                             | 18624           | 9438            | 12639           | 8321                   | 13701           | 13265           | <b>19903</b>     | 12158            |
| NG75                            | 18613           | 8787            | 12489           | 7717                   | 13517           | 13027           | <b>19868</b>     | 12052            |
| L50                             | 700             | 1181            | 910             | 1364                   | 782             | 820             | <b>645</b>       | 950              |
| LG50                            | 702             | 1238            | 915             | 1441                   | 788             | 827             | <b>646</b>       | 955              |
| L75                             | 1753            | 3186            | 2414            | 3675                   | 2135            | 2226            | <b>1620</b>      | 2509             |
| LG75                            | 1758            | 3400            | 2433            | 3953                   | 2161            | 2253            | <b>1624</b>      | 2527             |
| # misassemblies                 | 751             | 802             | 744             | 757                    | <b>733</b>      | 735             | 742              | 768              |
| # misassembled contigs          | 624             | 715             | 633             | 687                    | 615             | 630             | <b>610</b>       | 664              |
| Misassembled contigs length     | 34931702        | 25507758        | 28643451        | <b>21355751</b>        | 31273118        | 30251303        | 37027268         | 28868487         |
| # local misassemblies           | 1112            | <b>1011</b>     | 1066            | 1012                   | 1071            | 1069            | 1119             | 1071             |
| # unaligned mis. contigs        | 27              | 30              | 28              | <b>18</b>              | 28              | 31              | 26               | 31               |
| # unaligned contigs             | 3151 + 365 part | 2070 + 380 part | 3080 + 369 part | <b>1892 + 344 part</b> | 2967 + 347 part | 2973 + 349 part | 3150 + 362 part  | 3099 + 361 part  |
| Unaligned length                | 6896001         | 4890803         | 6910766         | <b>4596029</b>         | 6739536         | 6742165         | 6889509          | 6879138          |
| Genome fraction (%)             | 93.781          | 93.282          | 93.578          | 93.194                 | 93.585          | 93.595          | <b>93.789</b>    | 93.582           |
| Duplication ratio               | <b>1.004</b>    | 1.005           | 1.005           | 1.006                  | 1.005           | <b>1.004</b>    | <b>1.004</b>     | 1.005            |
| # N's per 100 kbp               | 0.00            | 0.00            | 0.00            | 0.00                   | 0.00            | 0.00            | 0.00             | 0.00             |
| # mismatches per 100 kbp        | 501.29          | 499.27          | 498.06          | 501.93                 | <b>495.52</b>   | 496.83          | 498.78           | 498.23           |
| # indels per 100 kbp            | 119.51          | 117.33          | 118.14          | <b>117.24</b>          | 118.01          | 118.21          | 119.22           | 118.08           |
| Largest alignment               | 402868          | 313000          | 334917          | 333479                 | 334919          | 334338          | <b>402877</b>    | 314918           |
| Total aligned length            | 113092386       | 112548843       | 112881644       | 112507933              | 112929042       | 112914657       | <b>113119011</b> | 112930607        |
| NA50                            | 35938           | 20690           | 27488           | 17825                  | 30759           | 29547           | <b>38675</b>     | 26330            |
| NGA50                           | 35924           | 20032           | 27365           | 17133                  | 30557           | 29286           | <b>38670</b>     | 26296            |
| NA75                            | 15941           | 8353            | 11070           | 7535                   | 11943           | 11648           | <b>16869</b>     | 10658            |
| NGA75                           | 15889           | 7768            | 10966           | 6898                   | 11792           | 11491           | <b>16840</b>     | 10579            |
| LA50                            | 865             | 1373            | 1086            | 1556                   | 956             | 990             | <b>813</b>       | 1128             |
| LGA50                           | 866             | 1436            | 1092            | 1641                   | 964             | 998             | <b>815</b>       | 1134             |
| LA75                            | 2115            | 3624            | 2802            | 4096                   | 2516            | 2602            | <b>1979</b>      | 2917             |
| LGA75                           | 2120            | 3866            | 2823            | 4406                   | 2546            | 2633            | <b>1984</b>      | 2938             |



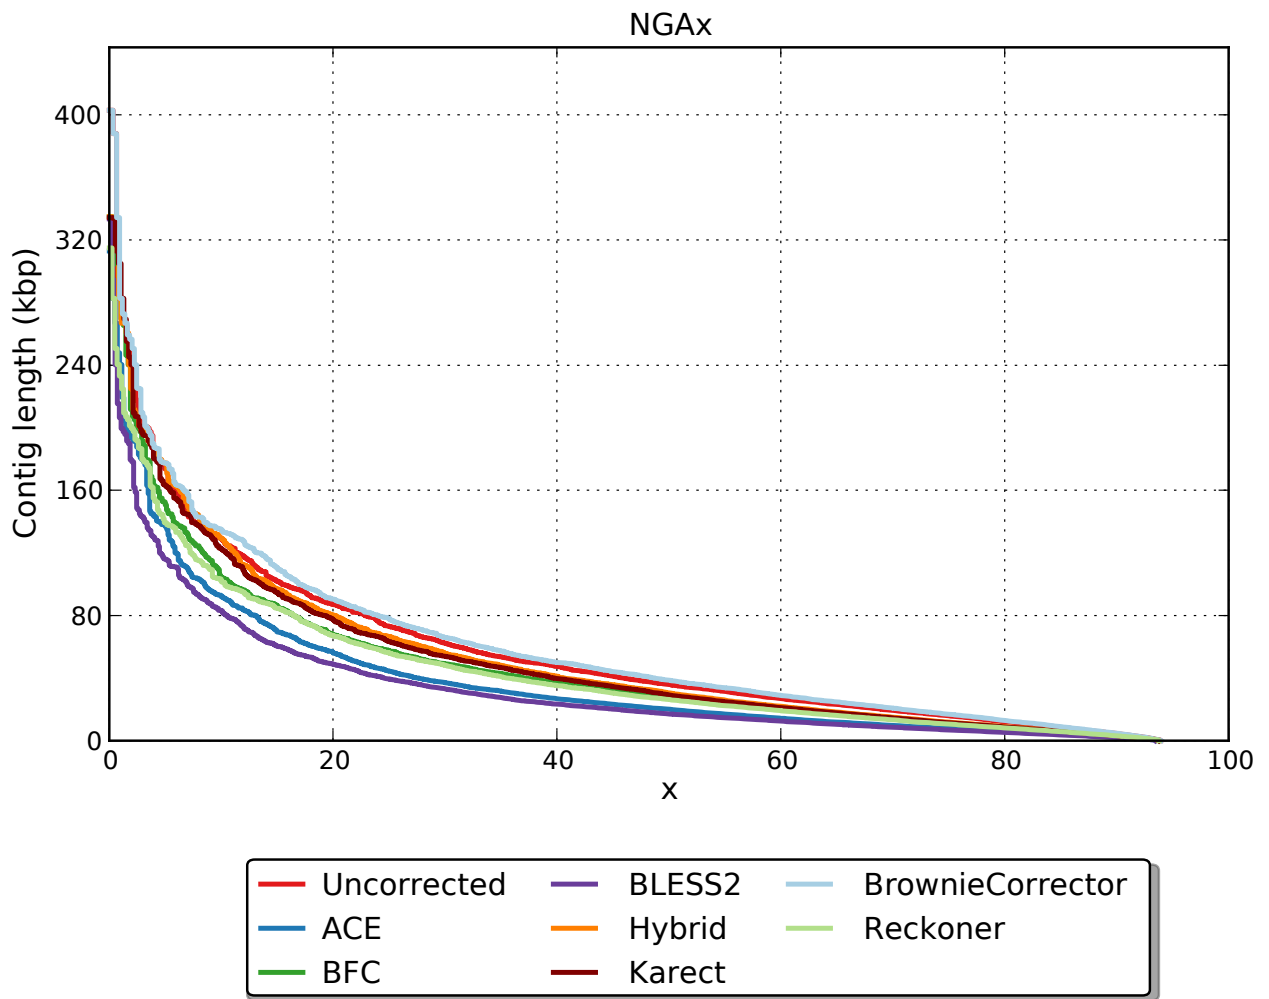

Figure 7: SPAdes assembly results for dataset D5 (*D. melanogaster*) for both uncorrected and corrected data. Contigs with length  $NGAx$  or larger produce  $x\%$  of the genome.

### 5.4.6 D6

Table 12 contains the Quast report after assembling dataset D6 (*A. thaliana*) with SPAdes. Fig. 8 shows the corresponding NGAx plot.

Table 12: Assembly quality metrics for D6

| Assembly                    | Uncorrected   | ACE           | BFC              | BLESS2              | Hybrid          | Karect        | BrownieCorrector | Reckoner         |
|-----------------------------|---------------|---------------|------------------|---------------------|-----------------|---------------|------------------|------------------|
| # contigs (≥ 0 bp)          | 153426        | 169680        | 152423           | 159228              | 156417          | 157208        | 153325           | 169100           |
| # contigs (≥ 1000 bp)       | 5274          | 5881          | 5208             | 6509                | 4992            | 5200          | 5007             | 5377             |
| # contigs (≥ 5000 bp)       | 3398          | 3767          | 3381             | 4038                | 3196            | 3344          | 3196             | 3452             |
| # contigs (≥ 10000 bp)      | 2530          | 2730          | 2516             | 2841                | 2400            | 2501          | 2389             | 2565             |
| # contigs (≥ 25000 bp)      | 1330          | 1302          | 1311             | 1313                | 1288            | 1307          | 1286             | 1307             |
| # contigs (≥ 50000 bp)      | 589           | 523           | 588              | 484                 | 603             | 584           | 612              | 591              |
| Total length (≥ 0 bp)       | 122790524     | 123570159     | 122779397        | 122265471           | 123023997       | 123085625     | 122779928        | <b>123950644</b> |
| Total length (≥ 1000 bp)    | 108694789     | 108396090     | <b>108822375</b> | 107698581           | 108735045       | 108743759     | 108694535        | 108777289        |
| Total length (≥ 5000 bp)    | 104074942     | 103085055     | <b>104321365</b> | 101443382           | 104314160       | 104125163     | 104260540        | 103974120        |
| Total length (≥ 10000 bp)   | 97777795      | 95556603      | 98031267         | 92759620            | <b>98505752</b> | 97989568      | 98403336         | 97527917         |
| Total length (≥ 25000 bp)   | 78164544      | 72474598      | 78262483         | 68171653            | 80366270        | 78482167      | <b>80445350</b>  | 76741954         |
| Total length (≥ 50000 bp)   | 51919360      | 44842751      | 52621466         | 39368697            | 55944501        | 52808127      | <b>56505536</b>  | 51275596         |
| # contigs                   | 6731          | 7363          | 6608             | 8051                | 6416            | 6647          | 6436             | 6809             |
| Largest contig              | 378346        | 360514        | 337032           | 263399              | <b>403164</b>   | 358676        | 360062           | 292751           |
| Total length                | 109681747     | 109400465     | <b>109771235</b> | 108742773           | 109698307       | 109722386     | 109662957        | 109743868        |
| Reference length            | 119668634     | 119668634     | 119668634        | 119668634           | 119668634       | 119668634     | 119668634        | 119668634        |
| GC (%)                      | 35.96         | 35.98         | 35.96            | 36.00               | 35.97           | 35.96         | 35.96            | 35.96            |
| Reference GC (%)            | 36.06         | 36.06         | 36.06            | 36.06               | 36.06           | 36.06         | 36.06            | 36.06            |
| N50                         | 46858         | 40291         | 47899            | 34704               | 51194           | 48131         | <b>52341</b>     | 46233            |
| NG50                        | 41749         | 35499         | 42189            | 30758               | 45986           | 42290         | <b>46094</b>     | 40862            |
| N75                         | 21989         | 18318         | 22072            | 16335               | 23637           | 22196         | <b>23725</b>     | 21324            |
| NG75                        | 15914         | 13442         | 16240            | 11682               | <b>16977</b>    | 16014         | 16925            | 15642            |
| L50                         | 650           | 743           | 635              | 844                 | 582             | 626           | <b>580</b>       | 666              |
| LG50                        | 762           | 878           | 745              | 1012                | 684             | 736           | <b>682</b>       | 780              |
| L75                         | 1504          | 1746          | 1484             | 1972                | 1367            | 1468          | <b>1360</b>      | 1547             |
| LG75                        | 1903          | 2236          | 1873             | 2565                | 1737            | 1859          | <b>1733</b>      | 1953             |
| # misassemblies             | 149           | 138           | 157              | 174                 | <b>112</b>      | 129           | 118              | 137              |
| # misassembled contigs      | 148           | 136           | 154              | 168                 | <b>111</b>      | 123           | 117              | 132              |
| Misassembled contigs length | 6392285       | 5198138       | 8078221          | 4928846             | <b>4684101</b>  | 5431837       | 5236199          | 6091039          |
| # local misassemblies       | 50            | <b>43</b>     | 44               | 69                  | 50              | 52            | 46               | 46               |
| # unaligned mis. contigs    | 2             | 2             | 2                | <b>1</b>            | <b>1</b>        | 2             | 2                | 2                |
| # unaligned contigs         | 238 + 21 part | 159 + 23 part | 223 + 24 part    | <b>93 + 30 part</b> | 231 + 27 part   | 235 + 27 part | 237 + 22 part    | 232 + 25 part    |
| Unaligned length            | 406289        | 241175        | 405558           | <b>184809</b>       | 394256          | 396474        | 404121           | 406267           |
| Genome fraction (%)         | 91.207        | 91.079        | <b>91.283</b>    | 90.628              | 91.253          | 91.255        | 91.215           | 91.255           |
| Duplication ratio           | <b>1.001</b>  | 1.002         | <b>1.001</b>     | <b>1.001</b>        | <b>1.001</b>    | <b>1.001</b>  | <b>1.001</b>     | <b>1.001</b>     |
| # N's per 100 kbp           | 0.00          | 0.00          | 0.00             | 0.00                | 0.00            | 0.00          | 0.00             | 0.00             |
| # mismatches per 100 kbp    | 20.01         | 25.24         | 19.63            | 22.12               | 18.53           | 19.60         | <b>18.22</b>     | 18.97            |
| # indels per 100 kbp        | 5.00          | 7.27          | 4.94             | 6.27                | 4.81            | 4.83          | <b>4.75</b>      | 4.85             |
| Largest alignment           | 378346        | 360476        | 322214           | 263398              | <b>402910</b>   | 358628        | 360023           | 292696           |
| Total aligned length        | 109234355     | 109062189     | <b>109324450</b> | 108528876           | 109272392       | 109287962     | 109225834        | 109293988        |
| NA50                        | 45861         | 39070         | 45958            | 33942               | 50386           | 46858         | <b>51386</b>     | 45215            |
| NGA50                       | 40802         | 34273         | 40910            | 29968               | <b>45423</b>    | 41391         | 45400            | 39605            |
| NA75                        | 21247         | 17857         | 21475            | 15900               | <b>23153</b>    | 21665         | 22895            | 20809            |
| NGA75                       | 15318         | 13110         | 15574            | 11412               | <b>16504</b>    | 15526         | 16405            | 15190            |
| LA50                        | 665           | 760           | 658              | 862                 | <b>591</b>      | 638           | <b>591</b>       | 683              |
| LGA50                       | 781           | 900           | 772              | 1033                | 695             | 751           | <b>694</b>       | 801              |
| LA75                        | 1544          | 1793          | 1537             | 2019                | <b>1388</b>     | 1501          | <b>1388</b>      | 1590             |
| LGA75                       | 1958          | 2296          | 1942             | 2628                | <b>1769</b>     | 1906          | 1773             | 2007             |

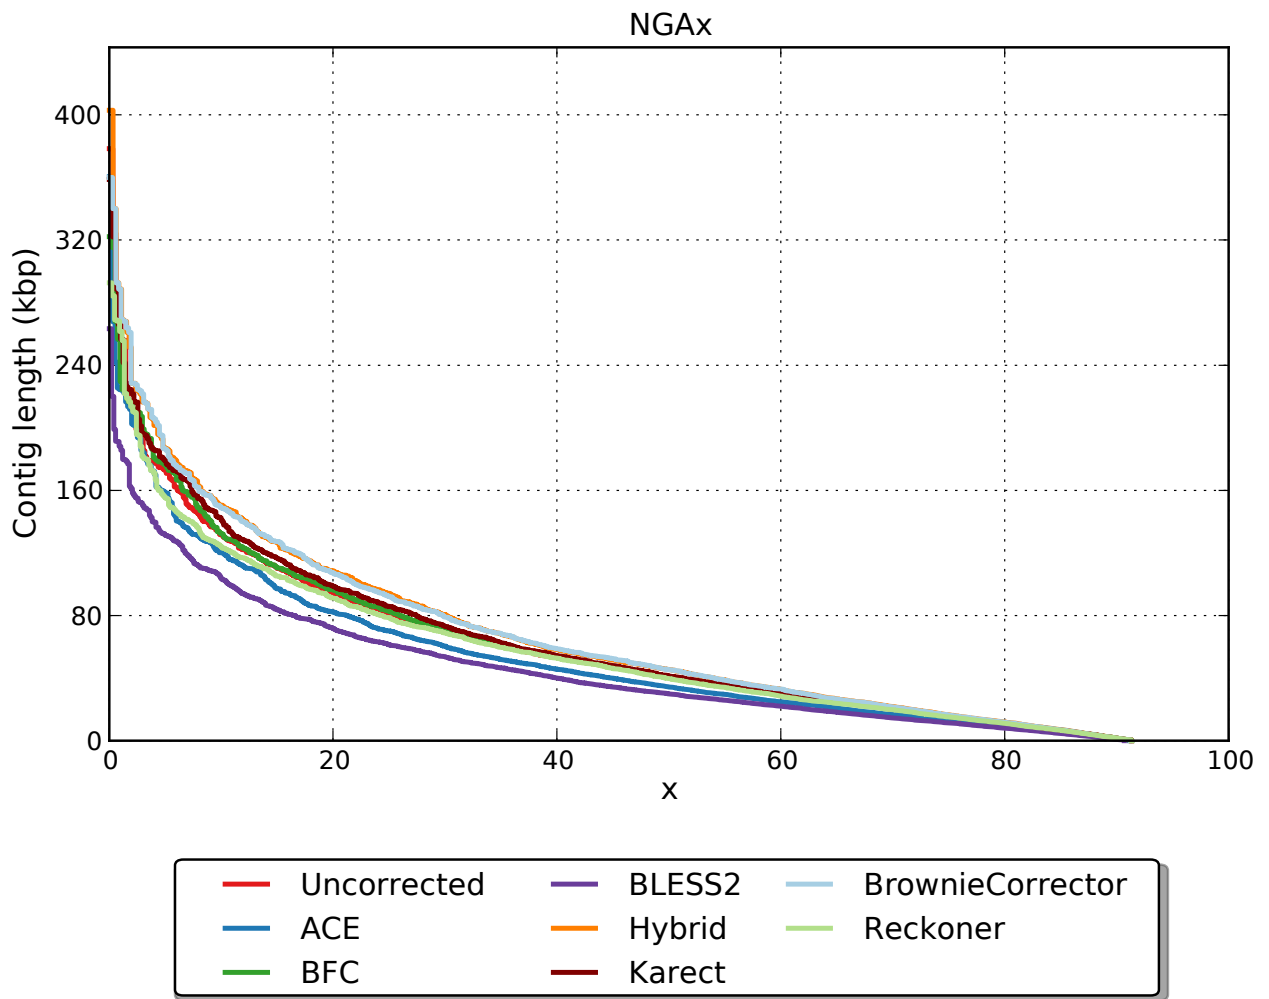

Figure 8: SPAdes assembly results for dataset D6 (*A. thaliana*) for both uncorrected and corrected data. Contigs with length  $NGAx$  or larger produce  $x\%$  of the genome.

### 5.4.7 D7

Table 13 contains the Quast report after a hybrid assembly of dataset D7 (*D. melanogaster*) with SPAdes. This is a hybrid assembly in which the corrected (and uncorrected) Illumina reads (R4) are complemented with the Pacbio reads (P1). Fig. 9 shows the corresponding NGAx plot.

Table 13: Assembly quality metrics for D7

| Assembly                    | Uncorrected      | ACE             | BFC             | BLESS2                 | Hybrid           | Karect          | BrownieCorrector | Reckoner         |
|-----------------------------|------------------|-----------------|-----------------|------------------------|------------------|-----------------|------------------|------------------|
| # contigs (≥ 0 bp)          | 84104            | 87785           | 82976           | 85783                  | 82832            | 83398           | 84087            | 92296            |
| # contigs (≥ 1000 bp)       | 4269             | 4797            | 4408            | 4424                   | 4195             | 4220            | 4221             | 5118             |
| # contigs (≥ 5000 bp)       | 2128             | 2801            | 2230            | 2527                   | 2012             | 2071            | 2099             | 2743             |
| # contigs (≥ 10000 bp)      | 1600             | 2088            | 1665            | 1913                   | 1486             | 1531            | 1566             | 2031             |
| # contigs (≥ 25000 bp)      | 1013             | 1231            | 1045            | 1161                   | 967              | 985             | 1004             | 1218             |
| # contigs (≥ 50000 bp)      | 653              | 701             | 666             | 691                    | 633              | 649             | 644              | 705              |
| Total length (≥ 0 bp)       | 130506649        | 128784476       | 130252545       | 127655011              | 130240850        | 130280733       | 130480461        | <b>130996905</b> |
| Total length (≥ 1000 bp)    | <b>121778040</b> | 120151535       | 121628181       | 119271937              | 121725554        | 121710656       | 121748117        | 121706993        |
| Total length (≥ 5000 bp)    | 116980449        | 115355940       | 116748510       | 114676443              | 116909862        | 116920459       | <b>117020950</b> | 116233150        |
| Total length (≥ 10000 bp)   | 113202715        | 110296487       | 112661638       | 110309610              | 113145023        | 113052834       | <b>113234024</b> | 111121525        |
| Total length (≥ 25000 bp)   | 103664419        | 96387206        | 102536172       | 98158594               | <b>104756954</b> | 104285446       | 104149759        | 97981828         |
| Total length (≥ 50000 bp)   | 90541399         | 77320552        | 88785758        | 81304930               | <b>92631370</b>  | 92090502        | 91215132         | 79688544         |
| # contigs                   | 6250             | 6413            | 6427            | 5633                   | 6104             | 6140            | 6209             | 7163             |
| Largest contig              | 754587           | 545648          | 667406          | 602677                 | 829779           | 829776          | 855558           | <b>887190</b>    |
| Total length                | <b>123171040</b> | 121267612       | 123042637       | 120101070              | 123066199        | 123060468       | 123143110        | 123138443        |
| Reference length            | 120381546        | 120381546       | 120381546       | 120381546              | 120381546        | 120381546       | 120381546        | 120381546        |
| GC (%)                      | 42.55            | 42.49           | 42.54           | 42.46                  | 42.55            | 42.55           | 42.54            | 42.52            |
| Reference GC (%)            | 42.42            | 42.42           | 42.42           | 42.42                  | 42.42            | 42.42           | 42.42            | 42.42            |
| N50                         | 120821           | 74655           | 113294          | 89691                  | <b>130622</b>    | 126171          | 124369           | 79327            |
| NG50                        | 123823           | 75089           | 114878          | 89541                  | <b>135170</b>    | 129017          | 128600           | 81109            |
| N75                         | 47031            | 32264           | 44284           | 37050                  | <b>50374</b>     | 49513           | 47556            | 32089            |
| NG75                        | 50427            | 33004           | 48111           | 36516                  | <b>54468</b>     | 53085           | 51344            | 34919            |
| L50                         | 284              | 431             | 303             | 369                    | <b>261</b>       | 274             | 276              | 413              |
| LG50                        | 273              | 425             | 291             | 371                    | <b>250</b>       | 263             | 265              | 396              |
| L75                         | 692              | 1041            | 740             | 896                    | <b>627</b>       | 654             | 668              | 1019             |
| LG75                        | 648              | 1021            | 697             | 902                    | <b>588</b>       | 614             | 626              | 957              |
| # misassemblies             | 1048             | 1132            | 1050            | 1206                   | 1014             | <b>1001</b>     | 1029             | 1143             |
| # misassembled contigs      | 668              | 809             | 665             | 791                    | <b>640</b>       | 642             | 661              | 769              |
| Misassembled contigs length | 66619419         | 57679056        | 64061457        | 60021320               | 68314711         | 66950147        | 66893425         | <b>57223037</b>  |
| # local misassemblies       | 1572             | <b>1480</b>     | 1515            | 1548                   | 1506             | 1536            | 1562             | 1655             |
| # unaligned mis. contigs    | 135              | 127             | 127             | <b>96</b>              | 118              | 123             | 120              | 122              |
| # unaligned contigs         | 3288 + 593 part  | 2361 + 651 part | 3294 + 629 part | <b>1838 + 541 part</b> | 3296 + 640 part  | 3267 + 637 part | 3286 + 598 part  | 3311 + 622 part  |
| Unaligned length            | 8782559          | 7074733         | 8683828         | <b>6035908</b>         | 8759389          | 8758466         | 8761387          | 8732208          |
| Genome fraction (%)         | <b>94.496</b>    | 94.284          | 94.491          | 94.241                 | 94.491           | 94.468          | 94.494           | 94.444           |
| Duplication ratio           | 1.006            | 1.006           | <b>1.005</b>    | <b>1.005</b>           | <b>1.005</b>     | <b>1.005</b>    | 1.006            | 1.006            |
| # N's per 100 kbp           | 0.00             | 0.00            | 0.00            | 0.00                   | 0.00             | 0.00            | 0.00             | 0.00             |
| # mismatches per 100 kbp    | 558.01           | 567.44          | 558.79          | 565.53                 | 556.90           | <b>556.23</b>   | 556.57           | 558.35           |
| # indels per 100 kbp        | 134.40           | 140.90          | 134.58          | 145.25                 | 134.03           | 134.02          | 134.08           | <b>133.68</b>    |
| Largest alignment           | 486030           | 417035          | 428461          | 338930                 | <b>547379</b>    | 547363          | 447086           | 406192           |
| Total aligned length        | <b>114077574</b> | 113784885       | 114050875       | 113749971              | 114018850        | 114005038       | 114071871        | 114037057        |
| NA50                        | 79151            | 54862           | 74311           | 61784                  | <b>86507</b>     | 82808           | 80392            | 56396            |
| NGA50                       | 80752            | 55391           | 77526           | 61609                  | <b>89065</b>     | 85226           | 83397            | 58176            |
| NA75                        | 32513            | 23228           | 30391           | 25843                  | <b>35224</b>     | 34107           | 33310            | 23753            |
| NGA75                       | 35171            | 23744           | 33021           | 25562                  | <b>37912</b>     | 36680           | 35880            | 25771            |
| LA50                        | 429              | 602             | 453             | 545                    | <b>406</b>       | 416             | 422              | 585              |
| LGA50                       | 412              | 593             | 435             | 547                    | <b>391</b>       | 400             | 405              | 561              |
| LA75                        | 1042             | 1443            | 1097            | 1291                   | <b>971</b>       | 997             | 1020             | 1417             |
| LGA75                       | 980              | 1415            | 1034            | 1299                   | <b>915</b>       | 940             | 961              | 1334             |

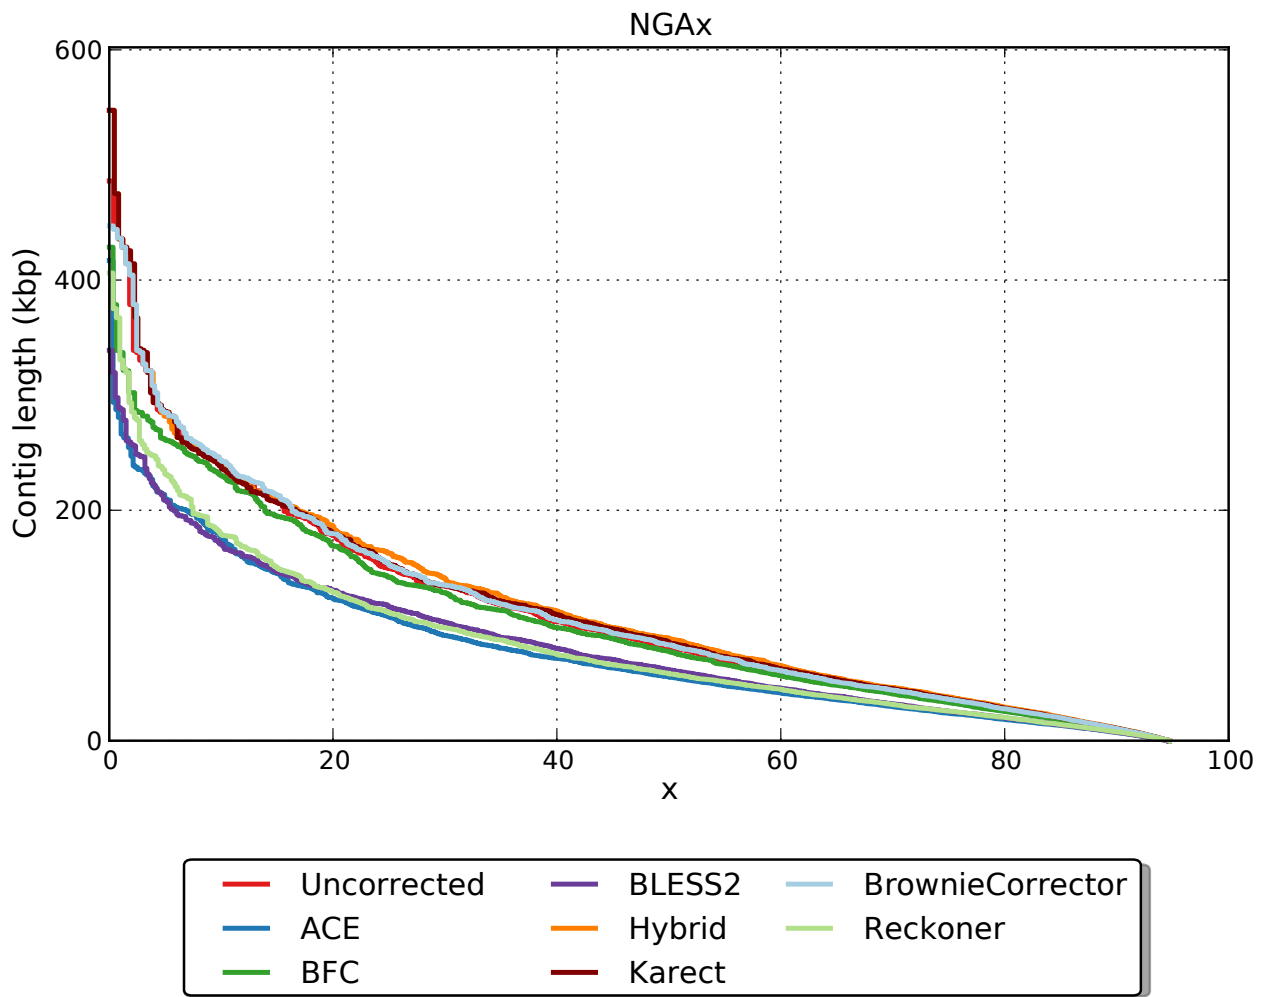

Figure 9: SPAdes assembly results for dataset D7 (*D. melanogaster*) for both uncorrected and corrected data. Contigs with length  $NGAx$  or larger produce  $x\%$  of the genome.

### 5.4.8 D8

Table 14 contains the Quast report after assembling dataset D8 *D. melanogaster* with SPAdes. This is a hybrid assembly in which the corrected (and uncorrected) Illumina reads (R5) are complemented with the Pacbio reads (P1). Fig. 10 shows the corresponding NGAx plot.

Table 14: Assembly quality metrics for D8

| Assembly                        | Uncorrected      | ACE             | BFC             | BLESS2                 | Hybrid          | Karect          | BrownieCorrector | Reckoner         |
|---------------------------------|------------------|-----------------|-----------------|------------------------|-----------------|-----------------|------------------|------------------|
| # contigs ( $\geq 0$ bp)        | 153257           | 193843          | 171323          | 177917                 | 167024          | 168273          | 153096           | 203849           |
| # contigs ( $\geq 1000$ bp)     | 4205             | 4162            | 4361            | 4367                   | 4019            | 4123            | 3990             | 4569             |
| # contigs ( $\geq 5000$ bp)     | 2010             | 2450            | 2147            | 2596                   | 1903            | 1960            | 1853             | 2326             |
| # contigs ( $\geq 10000$ bp)    | 1473             | 1845            | 1572            | 1909                   | 1402            | 1450            | 1363             | 1701             |
| # contigs ( $\geq 25000$ bp)    | 1003             | 1153            | 1044            | 1206                   | 975             | 992             | 944              | 1107             |
| # contigs ( $\geq 50000$ bp)    | 666              | 675             | 677             | 712                    | 676             | 672             | 641              | 690              |
| Total length ( $\geq 0$ bp)     | 135887496        | 136343035       | 137423351       | 134765843              | 136961075       | 137049756       | 135884144        | <b>139590516</b> |
| Total length ( $\geq 1000$ bp)  | 120696663        | 118502898       | 120701123       | 118317880              | 120560238       | 120537455       | <b>120706033</b> | 120624736        |
| Total length ( $\geq 5000$ bp)  | 115654547        | 114306741       | 115613997       | 113904254              | 115684153       | 115538672       | <b>115826462</b> | 115470305        |
| Total length ( $\geq 10000$ bp) | 111879129        | 109943429       | 111550471       | 109013641              | 112117292       | 111917113       | <b>112393212</b> | 111018421        |
| Total length ( $\geq 25000$ bp) | 104315319        | 98751430        | 102975275       | 97606444               | 105279669       | 104552044       | <b>105746772</b> | 101450513        |
| Total length ( $\geq 50000$ bp) | 92213430         | 81384118        | 89809178        | 79738854               | 94488203        | 92912592        | <b>94775486</b>  | 86538407         |
| # contigs                       | 5706             | 5518            | 5821            | 5517                   | 5350            | 5482            | 5466             | 6036             |
| Largest contig                  | 740414           | 714940          | 690671          | 676184                 | 929948          | 829272          | <b>949798</b>    | 715670           |
| Total length                    | <b>121725596</b> | 119424679       | 121699360       | 119105224              | 121471450       | 121469690       | 121719241        | 121630853        |
| Reference length                | 120381546        | 120381546       | 120381546       | 120381546              | 120381546       | 120381546       | 120381546        | 120381546        |
| GC (%)                          | 42.38            | 42.47           | 42.38           | 42.47                  | 42.39           | 42.39           | 42.38            | 42.38            |
| Reference GC (%)                | 42.42            | 42.42           | 42.42           | 42.42                  | 42.42           | 42.42           | 42.42            | 42.42            |
| N50                             | 125354           | 92982           | 112004          | 82650                  | 127431          | 123975          | <b>137513</b>    | 101811           |
| NG50                            | 126353           | 92254           | 113406          | 81120                  | 129321          | 125108          | <b>139117</b>    | 103109           |
| N75                             | 51706            | 38805           | 47534           | 36572                  | <b>57471</b>    | 54567           | 57390            | 41325            |
| NG75                            | 53948            | 37895           | 49131           | 35352                  | <b>59245</b>    | 55512           | 58973            | 42751            |
| L50                             | 270              | 355             | 297             | 397                    | 261             | 271             | <b>239</b>       | 333              |
| LG50                            | 265              | 360             | 291             | 405                    | 257             | 267             | <b>234</b>       | 327              |
| L75                             | 648              | 861             | 708             | 936                    | 614             | 638             | <b>577</b>       | 794              |
| LG75                            | 629              | 880             | 687             | 963                    | 600             | 623             | <b>559</b>       | 772              |
| # misassemblies                 | 892              | 919             | 876             | <b>860</b>             | 870             | 864             | 894              | 936              |
| # misassembled contigs          | 581              | 648             | 576             | 656                    | 562             | 577             | <b>561</b>       | 634              |
| Misassembled contigs length     | 64530411         | 54903095        | 59072274        | <b>50276098</b>        | 63420552        | 63011931        | 68069287         | 57826313         |
| # local misassemblies           | 1487             | 1426            | 1526            | 1432                   | 1451            | <b>1422</b>     | 1493             | 1482             |
| # unaligned mis. contigs        | 93               | 90              | 112             | 99                     | 99              | 104             | <b>89</b>        | 97               |
| # unaligned contigs             | 2813 + 500 part  | 1718 + 495 part | 2666 + 539 part | <b>1512 + 466 part</b> | 2558 + 510 part | 2563 + 512 part | 2802 + 506 part  | 2694 + 510 part  |
| Unaligned length                | 7569584          | 5423140         | 7538412         | <b>5168064</b>         | 7336591         | 7325032         | 7588629          | 7445130          |
| Genome fraction (%)             | <b>94.400</b>    | 94.223          | 94.357          | 94.163                 | 94.379          | 94.392          | 94.394           | 94.358           |
| Duplication ratio               | 1.005            | 1.005           | 1.005           | 1.005                  | 1.005           | 1.005           | <b>1.004</b>     | 1.005            |
| # N's per 100 kbp               | 0.00             | 0.00            | 0.00            | 0.00                   | 0.00            | 0.00            | 0.00             | 0.00             |
| # mismatches per 100 kbp        | 505.96           | 503.80          | 501.44          | 505.43                 | 501.69          | <b>501.23</b>   | 504.97           | 502.37           |
| # indels per 100 kbp            | 120.43           | 119.21          | <b>118.69</b>   | 121.82                 | 118.72          | 118.84          | 120.22           | 118.87           |
| Largest alignment               | 453436           | 453475          | 440801          | 402865                 | 517576          | <b>587714</b>   | 508703           | 453456           |
| Total aligned length            | 113902949        | 113689117       | 113904771       | 113665384              | 113890437       | 113897046       | 113888974        | <b>113906686</b> |
| NA50                            | 83845            | 65926           | 78250           | 61557                  | 86556           | 85122           | <b>87799</b>     | 70604            |
| NGA50                           | 85003            | 65163           | 78985           | 60574                  | 87822           | 85881           | <b>88877</b>     | 71724            |
| NA75                            | 35457            | 29274           | 33797           | 28409                  | 38951           | 37932           | <b>39505</b>     | 30157            |
| NGA75                           | 36760            | 28366           | 34986           | 27330                  | 40266           | 38829           | <b>41434</b>     | 31616            |
| LA50                            | 419              | 507             | 433             | 529                    | 399             | 403             | <b>391</b>       | 470              |
| LGA50                           | 411              | 515             | 424             | 539                    | 393             | 397             | <b>384</b>       | 461              |
| LA75                            | 972              | 1183            | 1021            | 1234                   | 911             | 936             | <b>896</b>       | 1119             |
| LGA75                           | 944              | 1208            | 993             | 1268                   | 890             | 915             | <b>871</b>       | 1089             |

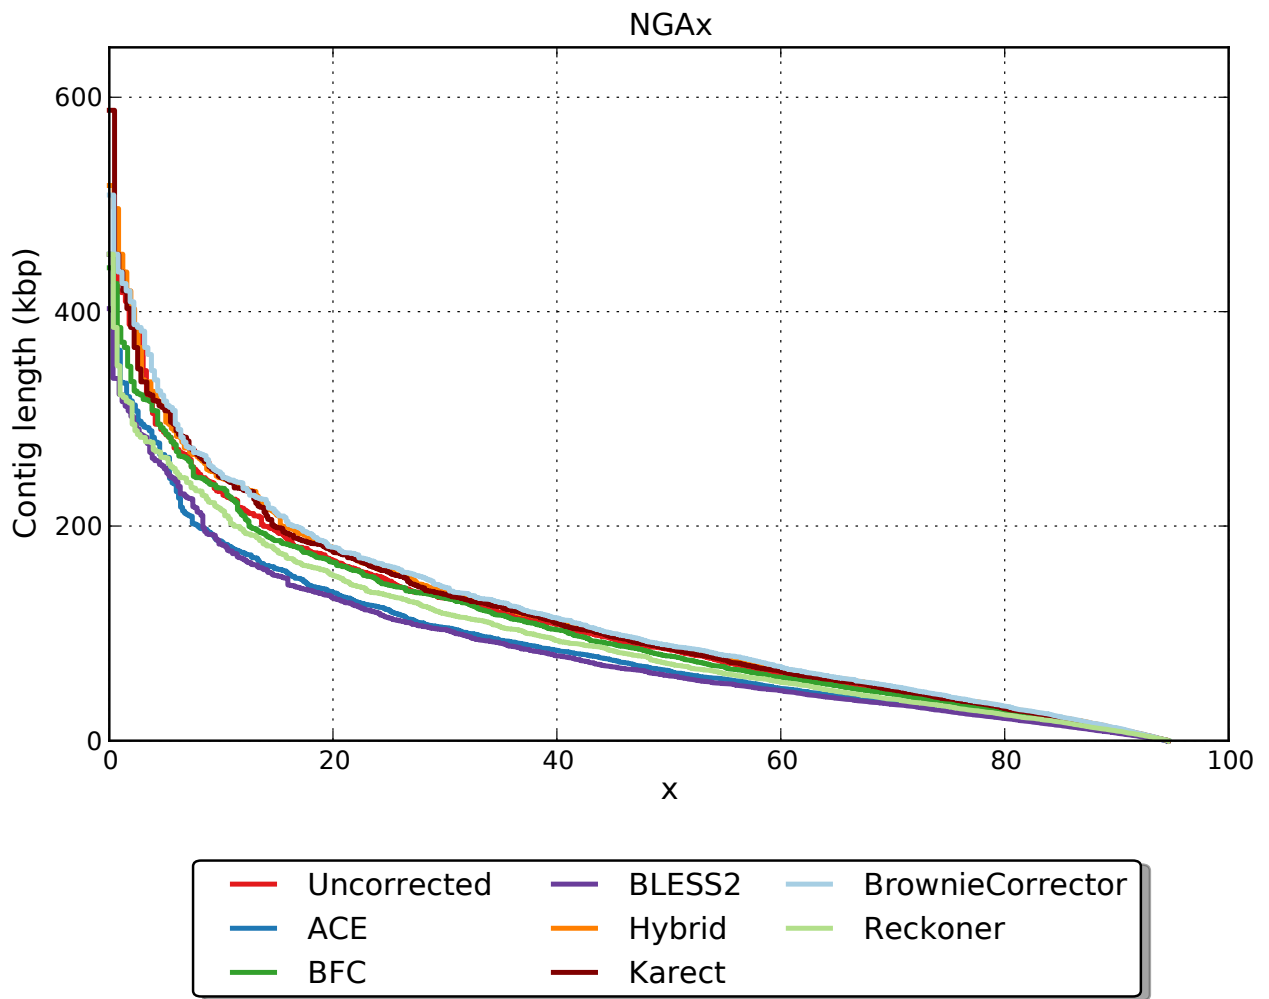

Figure 10: SPAdes assembly results for dataset D8 (*D. melanogaster*) for both uncorrected and corrected data. Contigs with length  $NGAx$  or larger produce  $x\%$  of the genome.

### 5.4.9 D9

Table 15 contains the Quast report after assembling dataset D9 (*A. thaliana*) with SPAdes. This is a hybrid assembly in which the corrected (and uncorrected) Illumina reads (R6) are complemented with the Pacbio reads (P2). Fig. 11 shows the corresponding NGAx plot.

Table 15: Assembly quality metrics for D9

| Assembly                        | Uncorrected    | ACE            | BFC              | BLESS2                | Hybrid           | Karect         | BrownieCorrector | Reckoner         |
|---------------------------------|----------------|----------------|------------------|-----------------------|------------------|----------------|------------------|------------------|
| # contigs ( $\geq 0$ bp)        | 142998         | 158391         | 142712           | 148192                | 146017           | 147021         | 142974           | 158545           |
| # contigs ( $\geq 1000$ bp)     | 4033           | 4220           | 3993             | 4545                  | 3926             | 4013           | 3896             | 4284             |
| # contigs ( $\geq 5000$ bp)     | 2412           | 2542           | 2430             | 2705                  | 2300             | 2377           | 2292             | 2631             |
| # contigs ( $\geq 10000$ bp)    | 1802           | 1898           | 1808             | 1985                  | 1717             | 1777           | 1711             | 1982             |
| # contigs ( $\geq 25000$ bp)    | 1109           | 1099           | 1113             | 1140                  | 1048             | 1081           | 1062             | 1198             |
| # contigs ( $\geq 50000$ bp)    | 638            | 636            | 633              | 618                   | 621              | 631            | 620              | 660              |
| Total length ( $\geq 0$ bp)     | 123218064      | 123981967      | 123224625        | 122885449             | 123518075        | 123539458      | 123245160        | <b>124331702</b> |
| Total length ( $\geq 1000$ bp)  | 110256731      | 109999806      | 110353964        | 109476185             | <b>110361604</b> | 110330888      | 110301171        | 110311214        |
| Total length ( $\geq 5000$ bp)  | 106152731      | 105686683      | <b>106414045</b> | 104796912             | 106244053        | 106169772      | 106242186        | 106088913        |
| Total length ( $\geq 10000$ bp) | 101804805      | 101043252      | 101979115        | 99699235              | 102079432        | 101873514      | <b>102085247</b> | 101431478        |
| Total length ( $\geq 25000$ bp) | 90414664       | 87963335       | 90363257         | 85957292              | 91028806         | 90379967       | <b>91415021</b>  | 88457127         |
| Total length ( $\geq 50000$ bp) | 73498519       | 71549764       | 73040202         | 67808341              | <b>75725947</b>  | 74247235       | 75503677         | 69145241         |
| # contigs                       | 5138           | 5334           | 5059             | 5669                  | 4997             | 5078           | 4983             | 5346             |
| Largest contig                  | 513726         | 548881         | 636585           | 608766                | 638980           | 604382         | <b>638981</b>    | 568204           |
| Total length                    | 111015037      | 110759642      | 111083449        | 110246718             | <b>111096537</b> | 111062930      | 111043967        | 111041653        |
| Reference length                | 119668634      | 119668634      | 119668634        | 119668634             | 119668634        | 119668634      | 119668634        | 119668634        |
| GC (%)                          | 35.94          | 35.96          | 35.95            | 35.96                 | 35.95            | 35.95          | 35.94            | 35.94            |
| Reference GC (%)                | 36.06          | 36.06          | 36.06            | 36.06                 | 36.06            | 36.06          | 36.06            | 36.06            |
| N50                             | 82512          | 78856          | 83316            | 71534                 | <b>94701</b>     | 86750          | 93967            | 71963            |
| NG50                            | 75466          | 70566          | 74799            | 61723                 | <b>84439</b>     | 78085          | 82118            | 64130            |
| N75                             | 35434          | 31830          | 34731            | 28802                 | 37344            | 35373          | <b>37856</b>     | 31577            |
| NG75                            | 25874          | 23118          | 25874            | 20720                 | 26758            | 25818          | <b>27539</b>     | 23731            |
| L50                             | 359            | 380            | 363              | 403                   | 325              | 345            | <b>324</b>       | 433              |
| LG50                            | 414            | 439            | 417              | 474                   | <b>373</b>       | 397            | 374              | 496              |
| L75                             | 870            | 926            | 877              | 1018                  | <b>796</b>       | 845            | 800              | 1015             |
| LG75                            | 1083           | 1174           | 1089             | 1308                  | <b>999</b>       | 1057           | <b>999</b>       | 1252             |
| # misassemblies                 | 617            | 597            | 596              | 617                   | 574              | <b>570</b>     | 572              | 603              |
| # misassembled contigs          | 463            | 469            | 454              | 482                   | 437              | 438            | <b>428</b>       | 452              |
| Misassembled contigs length     | 27054338       | 25914859       | 27793634         | <b>22441602</b>       | 26444291         | 25929567       | 26374921         | 23718330         |
| # local misassemblies           | 457            | <b>432</b>     | 453              | 520                   | 445              | 437            | 459              | 465              |
| # unaligned mis. contigs        | 9              | <b>7</b>       | <b>7</b>         | <b>7</b>              | 9                | 8              | <b>7</b>         | <b>7</b>         |
| # unaligned contigs             | 270 + 142 part | 190 + 127 part | 254 + 126 part   | <b>142 + 142 part</b> | 257 + 130 part   | 271 + 121 part | 264 + 135 part   | 265 + 122 part   |
| Unaligned length                | 677416         | <b>488901</b>  | 635261           | 494795                | 679750           | 651220         | 685268           | 634358           |
| Genome fraction (%)             | 91.801         | 91.738         | <b>91.908</b>    | 91.321                | 91.861           | 91.856         | 91.817           | 91.843           |
| Duplication ratio               | <b>1.004</b>   | <b>1.004</b>   | <b>1.004</b>     | <b>1.004</b>          | <b>1.004</b>     | <b>1.004</b>   | <b>1.004</b>     | 1.005            |
| # N's per 100 kbp               | 0.00           | 0.00           | 0.00             | 0.00                  | 0.00             | 0.00           | 0.00             | 0.00             |
| # mismatches per 100 kbp        | 51.77          | 58.12          | 52.17            | 58.54                 | 51.78            | 52.60          | 51.13            | <b>50.56</b>     |
| # indels per 100 kbp            | 10.92          | 15.70          | 10.85            | 21.11                 | 10.38            | 10.59          | 10.35            | <b>10.34</b>     |
| Largest alignment               | 513722         | 527818         | 540557           | 608680                | 635802           | 604382         | <b>635803</b>    | 567176           |
| Total aligned length            | 110257880      | 110165936      | <b>110362885</b> | 109666875             | 110338430        | 110333035      | 110274459        | 110310731        |
| NA50                            | 74168          | 70306          | 72208            | 64696                 | <b>84946</b>     | 77951          | 82261            | 62281            |
| NGA50                           | 65138          | 62161          | 64709            | 55639                 | <b>74620</b>     | 68873          | 71788            | 56734            |
| NA75                            | 30088          | 27435          | 30288            | 25407                 | 32098            | 31063          | <b>32833</b>     | 27426            |
| NGA75                           | 22319          | 20022          | 22827            | 17956                 | 23545            | 22847          | <b>23679</b>     | 21034            |
| LA50                            | 398            | 418            | 409              | 440                   | <b>359</b>       | 384            | 361              | 479              |
| LGA50                           | 461            | 485            | 472              | 519                   | <b>413</b>       | 443            | 417              | 552              |
| LA75                            | 984            | 1047           | 1003             | 1137                  | <b>900</b>       | 958            | 906              | 1141             |
| LGA75                           | 1235           | 1331           | 1251             | 1469                  | <b>1136</b>      | 1202           | 1140             | 1410             |



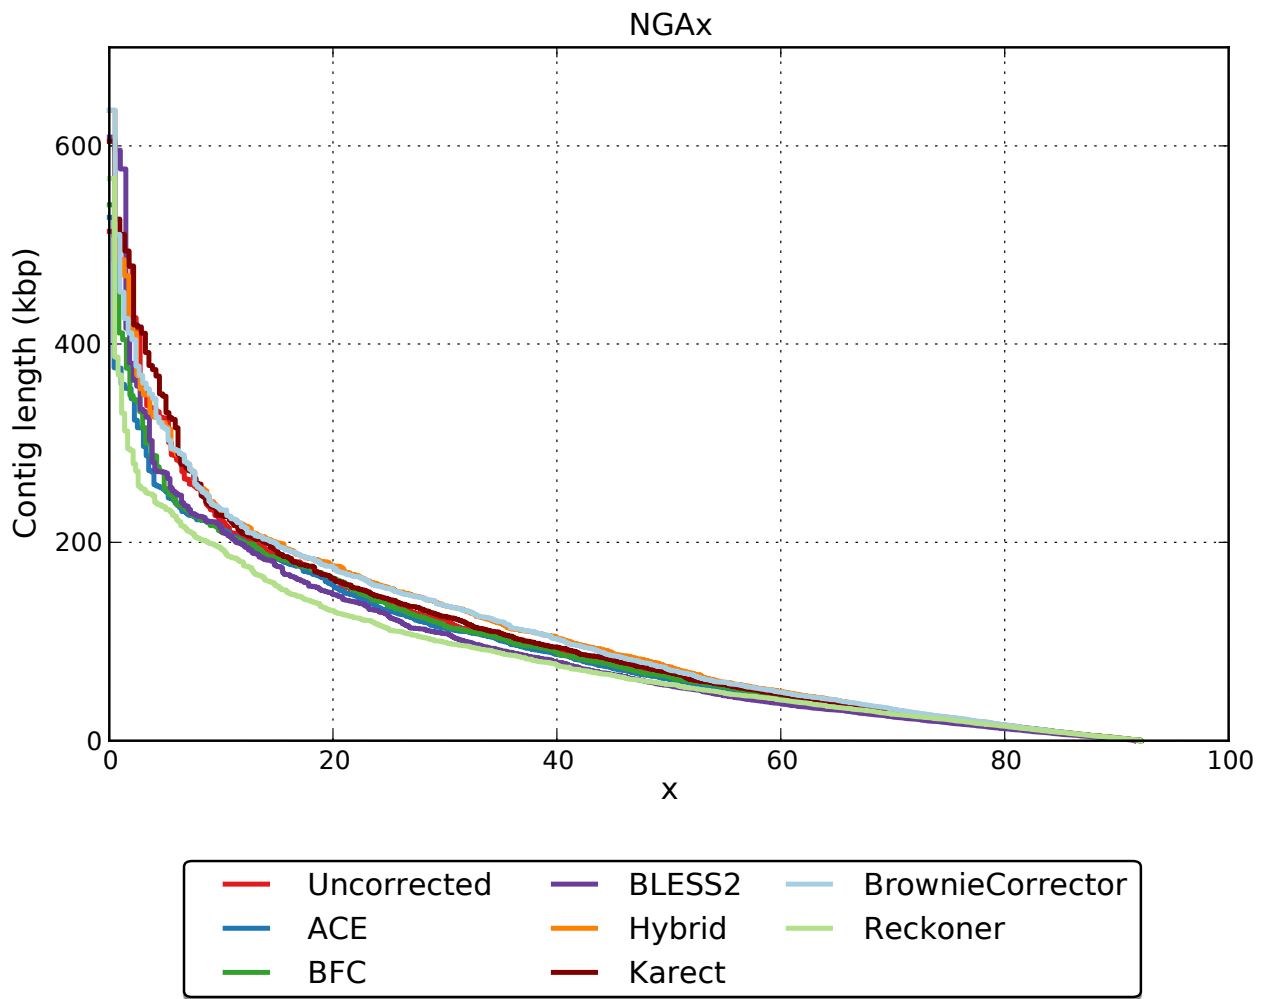

Figure 11: SPAdes assembly results for dataset D9 (*A. thaliana*) for both uncorrected and corrected data. Contigs with length  $NGAx$  or larger produce  $x\%$  of the genome.

## 5.5 Full Quast report (scaffolds)

This section contains the Quast evaluation report of scaffolds after assembling with each dataset with SPAdes. Error correction by ACE, BFC, BLESS2, Brownie, Karect and Reckoner are done before assembling the reads. The Uncorrected column refers to the quality of contigs without any cleaning process. The Hybrid column shows the quality of assembly of reads which are corrected jointly by BrownieCorrector and Karect. Default parameter settings are used for Quast, therefore all statistics are based on contigs of size  $\geq 500$  bp.

### 5.5.1 D1

Table 16 contains the Quast report after assembling dataset D1 (*Homo sapiens* Chr. 21) with SPAdes. Fig. 12 shows the corresponding NGAx plot.

Table 16: Assembly quality metrics for D1

| Assembly                    | Uncorrected | ACE         | BFC             | BLESS2             | Hybrid          | Karect         | BrownieCorrector | Reckoner        |
|-----------------------------|-------------|-------------|-----------------|--------------------|-----------------|----------------|------------------|-----------------|
| # contigs (≥ 0 bp)          | 15503       | 17167       | 15110           | 18380              | 16178           | 17003          | 14341            | 21252           |
| # contigs (≥ 1000 bp)       | 3498        | 3309        | 3284            | 3749               | 2813            | 3063           | 2907             | 4052            |
| # contigs (≥ 5000 bp)       | 1951        | 1912        | 1876            | 2014               | 1724            | 1826           | 1748             | 2036            |
| # contigs (≥ 10000 bp)      | 1147        | 1130        | 1131            | 1096               | 1127            | 1133           | 1126             | 1105            |
| # contigs (≥ 25000 bp)      | 251         | 281         | 281             | 222                | 344             | 313            | 338              | 193             |
| # contigs (≥ 50000 bp)      | 25          | 29          | 32              | 14                 | 56              | 38             | 52               | 12              |
| Total length (≥ 0 bp)       | 34398184    | 34481028    | 34385863        | 34366932           | 34506906        | 34561810       | 34339292         | <b>34763727</b> |
| Total length (≥ 1000 bp)    | 32641079    | 32638021    | 32675090        | 32371042           | <b>32712198</b> | 32700154       | 32706081         | 32510652        |
| Total length (≥ 5000 bp)    | 28708375    | 28999697    | 29107505        | 27838280           | <b>29942475</b> | 29527995       | 29774056         | 27339748        |
| Total length (≥ 10000 bp)   | 22963404    | 23400423    | 23768650        | 21227019           | <b>25630161</b> | 24533233       | 25273512         | 20609468        |
| Total length (≥ 25000 bp)   | 9022632     | 10086964    | 10372635        | 7729872            | <b>13215874</b> | 11547907       | 12926905         | 6697434         |
| Total length (≥ 50000 bp)   | 1506449     | 1830857     | 1990598         | 877864             | <b>3485559</b>  | 2401241        | 3333176          | 726268          |
| # contigs                   | 4066        | 3815        | 3837            | 4331               | 3290            | 3561           | 3388             | 4700            |
| Largest contig              | 82702       | 98568       | <b>109124</b>   | 82889              | 105146          | 92853          | 105053           | 80324           |
| Total length                | 33047367    | 32998806    | <b>33069170</b> | 32792092           | 33051550        | 33057202       | 33049826         | 32976233        |
| Reference length            | 40988574    | 40988574    | 40988574        | 40988574           | 40988574        | 40988574       | 40988574         | 40988574        |
| GC (%)                      | 40.73       | 40.75       | 40.73           | 40.68              | 40.76           | 40.75          | 40.75            | 40.62           |
| Reference GC (%)            | 40.93       | 40.93       | 40.93           | 40.93              | 40.93           | 40.93          | 40.93            | 40.93           |
| N50                         | 15702       | 16575       | 17050           | 14101              | <b>20504</b>    | 18195          | 19684            | 13097           |
| NG50                        | 11992       | 12721       | 13085           | 10604              | <b>15454</b>    | 14089          | 14798            | 10037           |
| N75                         | 8222        | 8669        | 8917            | 7445               | <b>10923</b>    | 9729           | 10416            | 6938            |
| NG75                        | 2972        | 3263        | 3143            | 2600               | <b>3857</b>     | 3531           | 3671             | 2464            |
| L50                         | 633         | 601         | 581             | 689                | <b>492</b>      | 548            | 502              | 746             |
| LG50                        | 922         | 874         | 844             | 1025               | <b>715</b>      | 794            | 734              | 1094            |
| L75                         | 1348        | 1276        | 1241            | 1486               | <b>1047</b>     | 1160           | 1079             | 1599            |
| LG75                        | 2470        | 2339        | 2284            | 2806               | <b>1907</b>     | 2114           | 1975             | 2987            |
| # misassemblies             | 173         | 149         | 186             | 174                | 111             | <b>102</b>     | 141              | 146             |
| # misassembled contigs      | 164         | 137         | 169             | 165                | 104             | <b>92</b>      | 132              | 141             |
| Misassembled contigs length | 2890519     | 2407563     | 3535938         | 2710908            | 2289710         | <b>2152215</b> | 2871345          | 2157464         |
| # local misassemblies       | 219         | 228         | <b>209</b>      | 247                | 262             | 248            | 226              | 228             |
| # unaligned mis. contigs    | 0           | 0           | 0               | 0                  | 0               | 0              | 0                | 0               |
| # unaligned contigs         | 79 + 8 part | 59 + 8 part | 76 + 8 part     | <b>47 + 9 part</b> | 66 + 8 part     | 64 + 6 part    | 77 + 9 part      | 67 + 5 part     |
| Unaligned length            | 86668       | 69281       | 88409           | <b>55386</b>       | 75372           | 73641          | 86573            | 73305           |
| Genome fraction (%)         | 80.055      | 79.987      | 80.096          | 79.572             | <b>80.221</b>   | 80.188         | 80.201           | 79.865          |
| Duplication ratio           | 1.004       | 1.004       | 1.005           | 1.004              | <b>1.003</b>    | 1.004          | <b>1.003</b>     | 1.005           |
| # N's per 100 kbp           | 49.01       | 60.56       | <b>48.55</b>    | 83.12              | 72.77           | 67.20          | 51.37            | 57.92           |
| # mismatches per 100 kbp    | 166.81      | 163.82      | 162.11          | 164.19             | <b>152.47</b>   | 155.03         | 157.12           | 158.29          |
| # indels per 100 kbp        | 36.34       | 36.37       | 35.73           | 35.69              | <b>35.94</b>    | 35.79          | 36.58            | <b>33.18</b>    |
| Largest alignment           | 82666       | 98563       | 96583           | 80972              | 104946          | 92848          | <b>104953</b>    | 80324           |
| Total aligned length        | 32885932    | 32847613    | 32911743        | 32670138           | <b>32927101</b> | 32919824       | 32920529         | 32799489        |
| NA50                        | 14909       | 15985       | 16161           | 13519              | <b>19844</b>    | 17626          | 18884            | 12630           |
| NGA50                       | 11377       | 12135       | 12294           | 10034              | <b>14613</b>    | 13528          | 14155            | 9670            |
| NA75                        | 7740        | 8245        | 8290            | 7020               | <b>10287</b>    | 9290           | 9838             | 6609            |
| NGA75                       | 2737        | 2944        | 2867            | 2411               | <b>3622</b>     | 3345           | 3485             | 2297            |
| LA50                        | 661         | 625         | 613             | 716                | <b>509</b>      | 567            | 523              | 769             |
| LGA50                       | 965         | 912         | 894             | 1068               | <b>742</b>      | 823            | 766              | 1131            |
| LA75                        | 1416        | 1336        | 1317            | 1553               | <b>1090</b>     | 1204           | 1130             | 1659            |
| LGA75                       | 2617        | 2463        | 2438            | 2959               | <b>1999</b>     | 2206           | 2083             | 3127            |

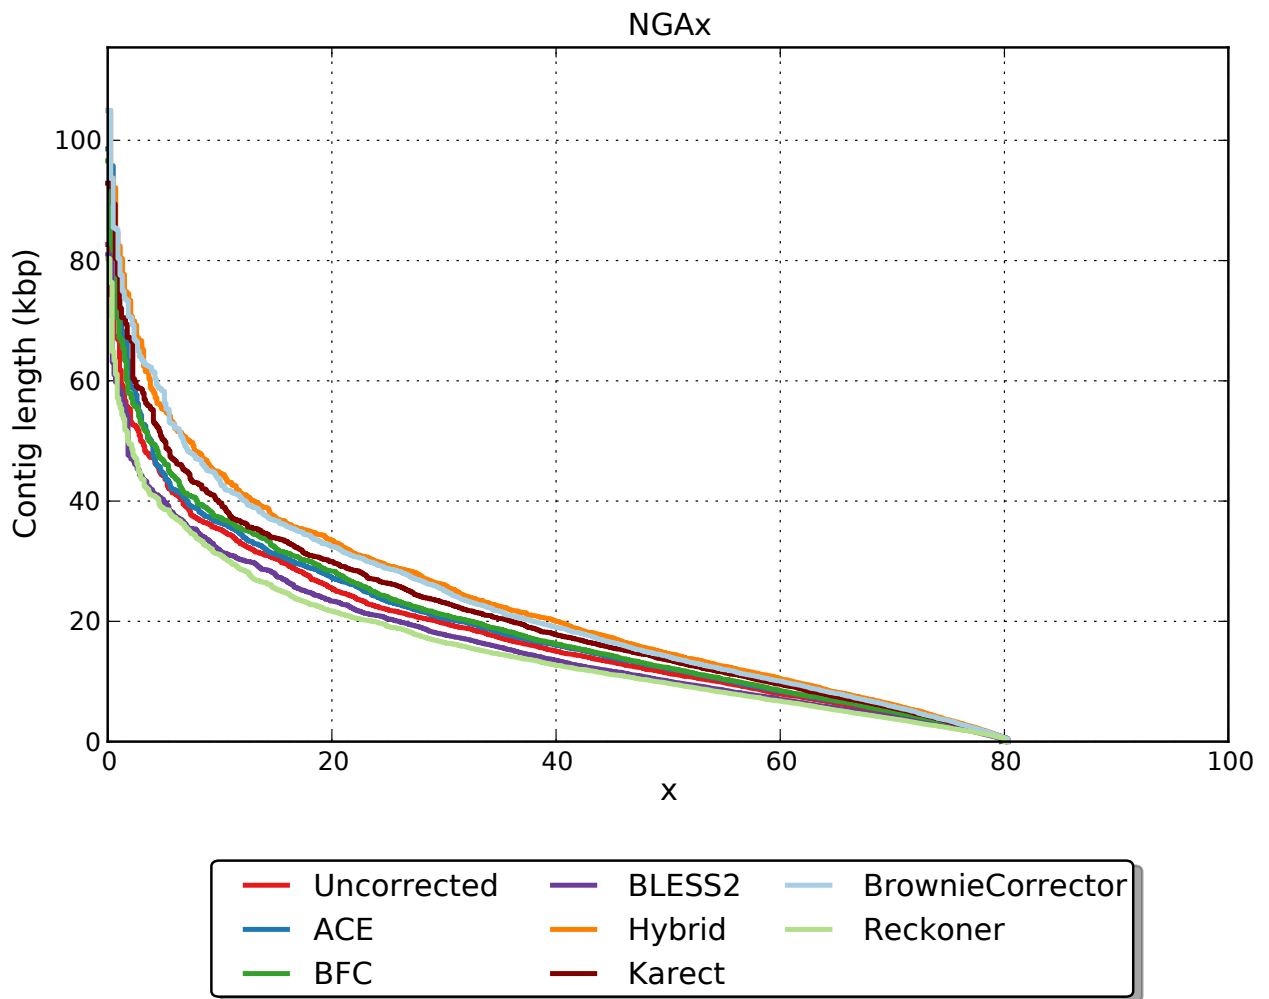

Figure 12: SPAdes assembly results for dataset D1 (*Homo sapiens* Chr. 21) for both uncorrected and corrected data. Contigs with length  $NGAx$  or larger produce  $x\%$  of the genome.

## 5.5.2 D2

Table 17 contains the Quast report after assembling dataset D2 (*Homo sapiens* Chr. 14) with SPAdes. Fig. 13 shows the corresponding NGAx plot.

Table 17: Assembly quality metrics for D2

| Assembly                        | Uncorrected        | ACE          | BFC           | BLESS2       | Hybrid          | Karect       | BrownieCorrector | Reckoner     |
|---------------------------------|--------------------|--------------|---------------|--------------|-----------------|--------------|------------------|--------------|
| # contigs ( $\geq 0$ bp)        | 412300             | 63904        | 61280         | 65498        | 54926           | 59015        | 85814            | 82873        |
| # contigs ( $\geq 1000$ bp)     | 14739              | 10310        | 9552          | 11193        | 7617            | 9004         | 8477             | 12975        |
| # contigs ( $\geq 5000$ bp)     | 5460               | 5223         | 5064          | 5399         | 4603            | 4971         | 4930             | 5473         |
| # contigs ( $\geq 10000$ bp)    | 2137               | 2714         | 2776          | 2629         | 2798            | 2742         | 2792             | 2424         |
| # contigs ( $\geq 25000$ bp)    | 184                | 503          | 600           | 408          | 804             | 655          | 710              | 294          |
| # contigs ( $\geq 50000$ bp)    | 4                  | 42           | 65            | 27           | 134             | 76           | 95               | 14           |
| Total length ( $\geq 0$ bp)     | <b>111749252</b>   | 88521825     | 88702085      | 88492512     | 88275916        | 88464779     | 90639963         | 89672578     |
| Total length ( $\geq 1000$ bp)  | 81372306           | 82954897     | 83332150      | 82608365     | <b>83614800</b> | 83395425     | 83495313         | 82247586     |
| Total length ( $\geq 5000$ bp)  | 57788314           | 69389231     | 71436004      | 67364079     | <b>75477644</b> | 72512288     | 74019938         | 62869914     |
| Total length ( $\geq 10000$ bp) | 34244755           | 51349355     | 54876683      | 47470113     | <b>62391757</b> | 56434088     | 58583750         | 41338299     |
| Total length ( $\geq 25000$ bp) | 5779031            | 17392790     | 21535238      | 13906135     | <b>31052540</b> | 23670662     | 26095142         | 9724112      |
| Total length ( $\geq 50000$ bp) | 224901             | 2538630      | 3934138       | 1701829      | <b>8524714</b>  | 4647418      | 5858991          | 830500       |
| # contigs                       | 17855              | 11720        | 10815         | 12831        | 8522            | 10136        | 9543             | 15158        |
| Largest contig                  | 68123              | 100666       | <b>126928</b> | 97813        | 102135          | 100683       | 100685           | 81231        |
| Total length                    | 83643950           | 83985139     | 84256551      | 83807676     | <b>84267170</b> | 84217172     | 84265213         | 83842223     |
| Reference length                | 107349540          | 107349540    | 107349540     | 107349540    | 107349540       | 107349540    | 107349540        | 107349540    |
| GC (%)                          | 40.66              | 40.71        | 40.71         | 40.68        | 40.73           | 40.72        | 40.73            | 40.48        |
| Reference GC (%)                | 40.89              | 40.89        | 40.89         | 40.89        | 40.89           | 40.89        | 40.89            | 40.89        |
| N50                             | 8250               | 13067        | 14341         | 11696        | <b>18672</b>    | 15461        | 16361            | 9825         |
| NG50                            | 5758               | 9330         | 10372         | 8410         | <b>13471</b>    | 10946        | 11777            | 6921         |
| N75                             | 4159               | 6750         | 7542          | 6069         | <b>9688</b>     | 7877         | 8480             | 4998         |
| NG75                            | 1185               | 1918         | 2157          | 1702         | <b>2806</b>     | 2303         | 2481             | 1455         |
| L50                             | 2974               | 1894         | 1708          | 2114         | <b>1317</b>     | 1593         | 1510             | 2483         |
| LG50                            | 4693               | 2955         | 2659          | 3304         | <b>2045</b>     | 2479         | 2341             | 3909         |
| L75                             | 6542               | 4125         | 3729          | 4583         | <b>2881</b>     | 3499         | 3293             | 5476         |
| LG75                            | 13948              | 8606         | 7721          | 9619         | <b>5908</b>     | 7222         | 6700             | 11552        |
| # misassemblies                 | 119                | 822          | 640           | 720          | 354             | 496          | <b>112</b>       | 689          |
| # misassembled contigs          | 119                | 760          | 612           | 679          | 337             | 469          | <b>110</b>       | 660          |
| Misassembled contigs length     | <b>997983</b>      | 10744993     | 9204509       | 8534721      | 7092262         | 7896311      | 2186146          | 6895634      |
| # local misassemblies           | 480                | 150          | 186           | 165          | 176             | 176          | 349              | <b>132</b>   |
| # unaligned mis. contigs        | <b>0</b>           | 1            | <b>0</b>      | <b>0</b>     | <b>0</b>        | <b>0</b>     | <b>0</b>         | <b>0</b>     |
| # unaligned contigs             | <b>11 + 8 part</b> | 12 + 27 part | 14 + 22 part  | 19 + 19 part | 14 + 16 part    | 13 + 22 part | 16 + 5 part      | 17 + 26 part |
| Unaligned length                | 16677              | 35163        | 31344         | 35033        | 27906           | 29729        | <b>16274</b>     | 38932        |
| Genome fraction (%)             | 77.427             | 77.786       | 78.123        | 77.707       | <b>78.327</b>   | 78.150       | 78.313           | 77.523       |
| Duplication ratio               | 1.006              | 1.005        | 1.004         | 1.004        | <b>1.002</b>    | 1.004        | <b>1.002</b>     | 1.007        |
| # N's per 100 kbp               | 59.38              | 19.79        | 23.88         | 20.83        | 23.75           | 23.18        | 44.74            | <b>17.91</b> |
| # mismatches per 100 kbp        | 112.08             | 127.07       | 119.92        | 125.10       | 105.69          | 114.90       | <b>101.65</b>    | 118.33       |
| # indels per 100 kbp            | 20.59              | 21.61        | 21.57         | 20.78        | 21.54           | 21.28        | 20.80            | <b>17.48</b> |
| Largest alignment               | 68123              | 100531       | <b>126784</b> | 93310        | 102135          | 100548       | 100547           | 70727        |
| Total aligned length            | 83424246           | 83718057     | 84046502      | 83630149     | <b>84181506</b> | 84037475     | 84168916         | 83423730     |
| NA50                            | 8159               | 12005        | 13492         | 11050        | <b>17885</b>    | 14695        | 16172            | 9345         |
| NGA50                           | 5668               | 8597         | 9698          | 7909         | <b>12795</b>    | 10298        | 11570            | 6509         |
| NA75                            | 4106               | 6173         | 6949          | 5671         | <b>9168</b>     | 7437         | 8356             | 4663         |
| NGA75                           | 1126               | 1714         | 1953          | 1553         | <b>2629</b>     | 2138         | 2413             | 1293         |
| LA50                            | 2996               | 2021         | 1796          | 2222         | <b>1372</b>     | 1669         | 1530             | 2584         |
| LGA50                           | 4738               | 3173         | 2810          | 3480         | <b>2133</b>     | 2612         | 2374             | 4091         |
| LA75                            | 6614               | 4448         | 3962          | 4848         | <b>3010</b>     | 3693         | 3339             | 5757         |
| LGA75                           | 14206              | 9372         | 8300          | 10283        | <b>6202</b>     | 7670         | 6814             | 12352        |

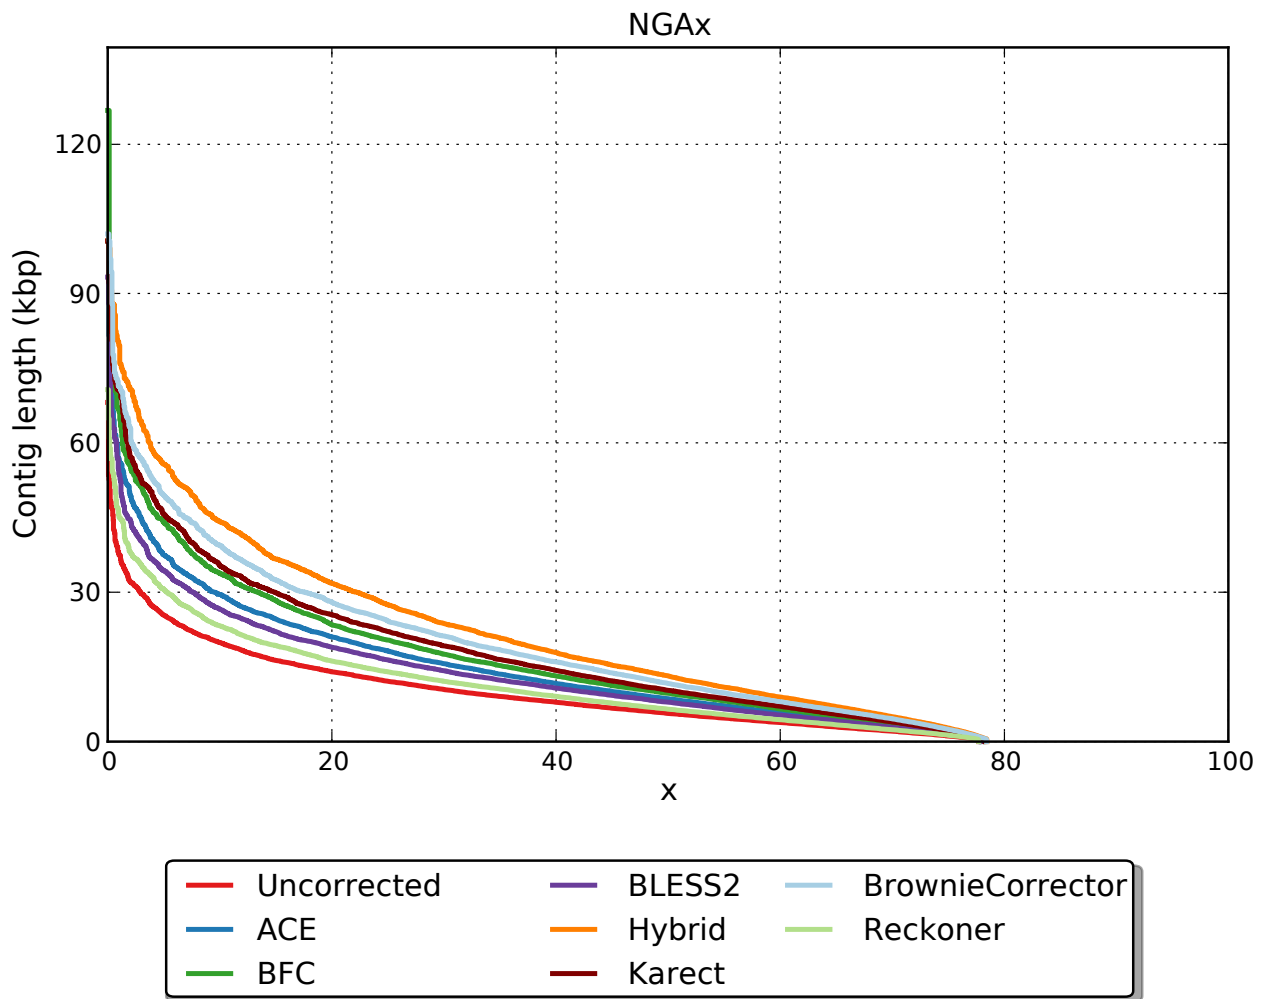

Figure 13: SPAdes assembly results for dataset D2 (*Homo sapiens* Chr. 14) for both uncorrected and corrected data. Contigs with length  $NGAx$  or larger produce  $x\%$  of the genome.

### 5.5.3 D3

Table 18 contains the Quast report after assembling dataset D3 (*C. elegans*) with SPAdes. Fig. 14 shows the corresponding NGAx plot.

Table 18: Assembly quality metrics for D3

| Assembly                    | Uncorrected      | ACE                    | BFC             | BLESS2          | Hybrid         | Karect         | BrownieCorrector | Reckoner         |
|-----------------------------|------------------|------------------------|-----------------|-----------------|----------------|----------------|------------------|------------------|
| # contigs (≥ 0 bp)          | 90335            | 107935                 | 90891           | 116183          | 91250          | 91070          | 90434            | 93218            |
| # contigs (≥ 1000 bp)       | 19533            | 25744                  | 19588           | 27553           | 19590          | 19574          | 19528            | 19596            |
| # contigs (≥ 5000 bp)       | 6275             | 5301                   | 6295            | 4769            | 6332           | 6328           | 6274             | 6262             |
| # contigs (≥ 10000 bp)      | 2407             | 1217                   | 2398            | 974             | 2435           | 2431           | 2408             | 2399             |
| # contigs (≥ 25000 bp)      | 287              | 122                    | 302             | 74              | 308            | 310            | 287              | 293              |
| # contigs (≥ 50000 bp)      | 68               | 23                     | 68              | 8               | 59             | 59             | 68               | 66               |
| Total length (≥ 0 bp)       | 116427720        | 112565978              | 116454662       | 112409711       | 116147212      | 116129035      | 116431324        | <b>116491367</b> |
| Total length (≥ 1000 bp)    | <b>104025257</b> | 95726723               | 103891921       | 92919344        | 103553564      | 103556644      | 104024612        | 103767981        |
| Total length (≥ 5000 bp)    | 72097772         | 47758221               | 71982022        | 40520190        | 71740186       | 71720794       | <b>72099815</b>  | 71747596         |
| Total length (≥ 10000 bp)   | 44967590         | 19948617               | 44604367        | 14894822        | 44301236       | 44247396       | <b>44980157</b>  | 44564052         |
| Total length (≥ 25000 bp)   | 13938243         | 5143754                | <b>13939203</b> | 2681884         | 13170145       | 13249871       | 13925728         | 13879239         |
| Total length (≥ 50000 bp)   | 6929307          | 1749408                | 6340634         | 478678          | 5235685        | 5239938        | <b>6929310</b>   | 6619857          |
| # contigs                   | 25948            | 36175                  | 26126           | 39647           | 26140          | 26112          | 25944            | 26150            |
| Largest contig              | <b>244078</b>    | 128379                 | 240394          | 80553           | 238991         | 238991         | <b>244078</b>    | 240969           |
| Total length                | 108653017        | 103255711              | 108611564       | 101595435       | 108285144      | 108279807      | <b>108653330</b> | 108501463        |
| Reference length            | 100286070        | 100286070              | 100286070       | 100286070       | 100286070      | 100286070      | 100286070        | 100286070        |
| GC (%)                      | 38.47            | 38.30                  | 38.46           | 38.20           | 38.41          | 38.41          | 38.47            | 38.46            |
| Reference GC (%)            | 35.44            | 35.44                  | 35.44           | 35.44           | 35.44          | 35.44          | 35.44            | 35.44            |
| N50                         | 7969             | 4582                   | 7916            | 3962            | 7923           | 7932           | <b>7971</b>      | 7922             |
| NG50                        | <b>8827</b>      | 4746                   | 8788            | 4025            | 8738           | 8752           | <b>8827</b>      | 8779             |
| N75                         | 3702             | 2326                   | 3682            | 2037            | 3674           | 3679           | <b>3704</b>      | 3670             |
| NG75                        | <b>4553</b>      | 2491                   | 4521            | 2100            | 4481           | 4484           | <b>4553</b>      | 4491             |
| L50                         | 3458             | 6109                   | 3489            | 7085            | 3541           | 3541           | <b>3457</b>      | 3488             |
| LG50                        | <b>2958</b>      | 5791                   | 2990            | 6921            | 3061           | 3062           | <b>2958</b>      | 2995             |
| L75                         | 8459             | 14033                  | 8509            | 16035           | 8547           | 8544           | <b>8457</b>      | 8514             |
| LG75                        | 6929             | 13108                  | 6975            | 15560           | 7067           | 7067           | <b>6928</b>      | 6995             |
| # misassemblies             | 1250             | 4509                   | 1212            | 1497            | <b>1207</b>    | 1237           | 1251             | 1235             |
| # misassembled contigs      | 1193             | 4044                   | 1158            | 1445            | <b>1147</b>    | 1174           | 1195             | 1178             |
| Misassembled contigs length | 9261752          | 18237042               | 9018821         | <b>5602595</b>  | 9086566        | 9223611        | 9254187          | 9177693          |
| # local misassemblies       | 402              | 328                    | 393             | <b>307</b>      | 410            | 412            | 401              | 411              |
| # unaligned mis. contigs    | 4                | 9                      | 4               | 3               | <b>2</b>       | <b>2</b>       | 4                | 3                |
| # unaligned contigs         | 4505 + 68 part   | <b>3840 + 129 part</b> | 4553 + 54 part  | 4189 + 58 part  | 4615 + 58 part | 4615 + 59 part | 4506 + 68 part   | 4538 + 65 part   |
| Unaligned length            | 16604720         | 14149412               | 16541258        | <b>13702622</b> | 16331635       | 16333588       | 16605131         | 16539717         |
| Genome fraction (%)         | 91.309           | 86.978                 | <b>91.329</b>   | 87.304          | 91.240         | 91.241         | 91.311           | 91.232           |
| Duplication ratio           | 1.005            | 1.022                  | 1.005           | <b>1.004</b>    | 1.005          | 1.005          | 1.005            | 1.005            |
| # N's per 100 kbp           | 64.44            | <b>58.26</b>           | 65.02           | 63.88           | 65.48          | 65.58          | 64.43            | 64.62            |
| # mismatches per 100 kbp    | 23.77            | 105.67                 | <b>23.20</b>    | 27.49           | 23.49          | 23.43          | 23.67            | 24.32            |
| # indels per 100 kbp        | 6.02             | 18.39                  | <b>5.94</b>     | 7.10            | 6.04           | 6.09           | 6.01             | 6.09             |
| Largest alignment           | 54032            | 27212                  | 54032           | 27155           | <b>64367</b>   | <b>64367</b>   | 54032            | 54032            |
| Total aligned length        | 91830875         | 87408611               | <b>91862827</b> | 87715060        | 91758254       | 91749370       | 91831029         | 91755248         |
| NA50                        | 5684             | 3013                   | 5674            | 2959            | <b>5687</b>    | 5681           | 5681             | 5643             |
| NGA50                       | 6419             | 3143                   | 6392            | 3012            | 6380           | 6377           | <b>6420</b>      | 6354             |
| NA75                        | 1935             | 1150                   | 1933            | 1238            | 1960           | <b>1962</b>    | 1937             | 1917             |
| NGA75                       | 2753             | 1306                   | 2739            | 1299            | 2729           | 2729           | <b>2754</b>      | 2711             |
| LA50                        | 4987             | 9285                   | 4997            | 9468            | <b>4974</b>    | 4975           | 4986             | 5018             |
| LGA50                       | 4294             | 8803                   | 4305            | 9249            | 4310           | 4311           | <b>4293</b>      | 4332             |
| LA75                        | 12939            | 22780                  | 12960           | 22529           | <b>12871</b>   | <b>12871</b>   | 12936            | 13022            |
| LGA75                       | 10236            | 20964                  | 10265           | 21754           | 10291          | 10293          | <b>10234</b>     | 10340            |

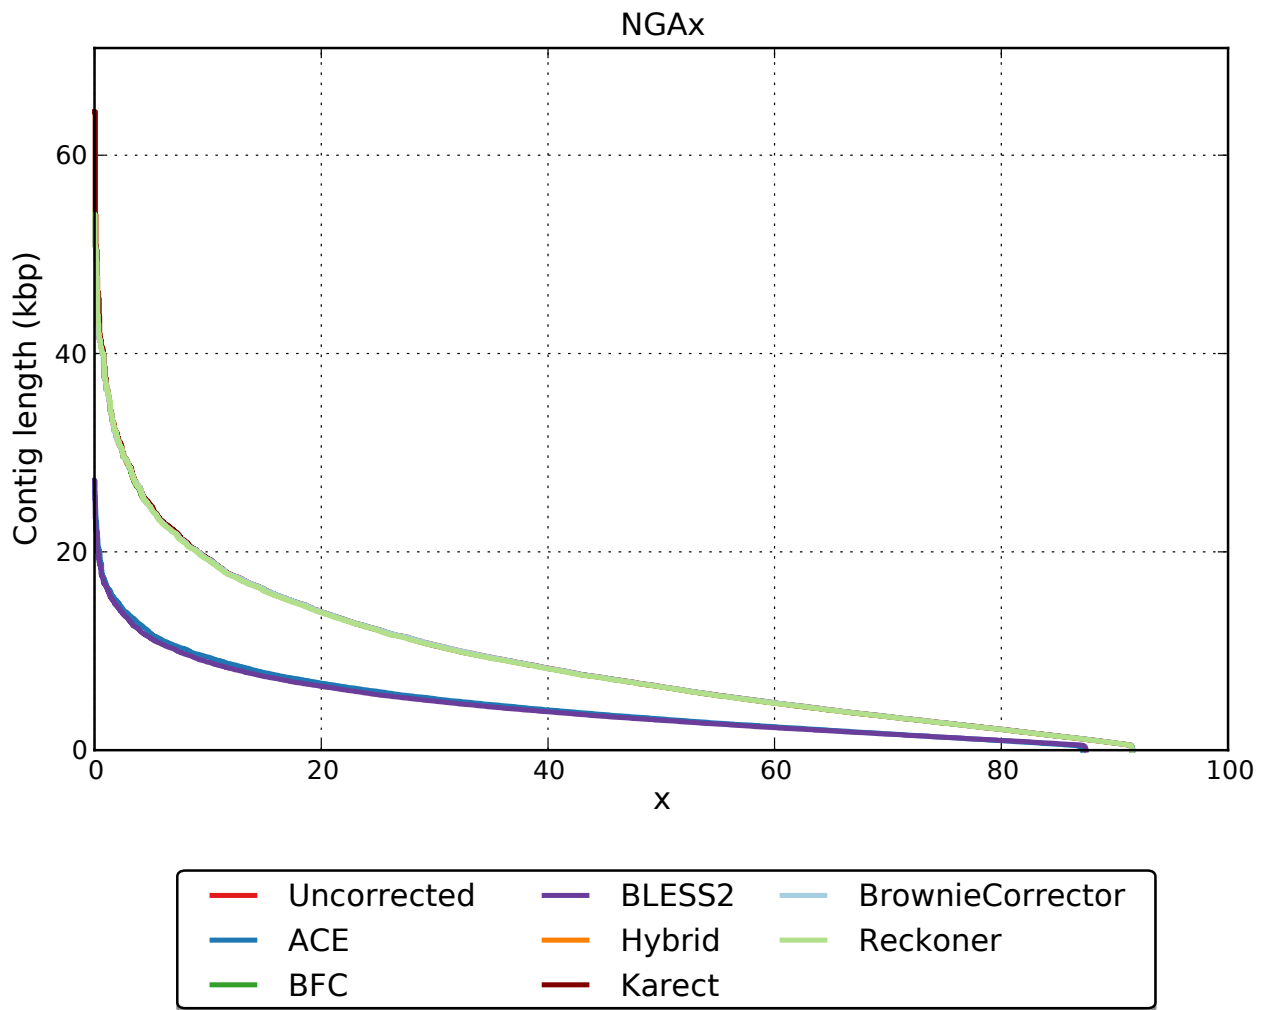

Figure 14: SPAdes assembly results for dataset D3 (*C. elegans*) for both uncorrected and corrected data. Contigs with length  $NGAx$  or larger produce  $x\%$  of the genome.



### 5.5.4 D4

Table 19 contains the Quast report after assembling dataset D4 (*D. melanogaster*) with SPAdes. Fig. 15 shows the corresponding NGAx plot.

Table 19: Assembly quality metrics for D4

| Assembly                    | Uncorrected      | ACE             | BFC             | BLESS2                 | Hybrid           | Karect           | BrownieCorrector | Reckoner         |
|-----------------------------|------------------|-----------------|-----------------|------------------------|------------------|------------------|------------------|------------------|
| # contigs (≥ 0 bp)          | 93227            | 97585           | 91434           | 95653                  | 91669            | 92410            | 93123            | 101162           |
| # contigs (≥ 1000 bp)       | 5191             | 6530            | 5222            | 6405                   | 5061             | 5110             | 5139             | 6011             |
| # contigs (≥ 5000 bp)       | 2504             | 3776            | 2571            | 3704                   | 2366             | 2422             | 2467             | 3104             |
| # contigs (≥ 10000 bp)      | 1928             | 2775            | 1971            | 2737                   | 1812             | 1849             | 1889             | 2305             |
| # contigs (≥ 25000 bp)      | 1208             | 1435            | 1220            | 1402                   | 1162             | 1177             | 1202             | 1331             |
| # contigs (≥ 50000 bp)      | 704              | 624             | 689             | 608                    | 682              | 692              | 706              | 692              |
| Total length (≥ 0 bp)       | 130032928        | 128403487       | 129857535       | 127084174              | 129839690        | 129910273        | 130015593        | <b>130535397</b> |
| Total length (≥ 1000 bp)    | 120113313        | 118405134       | 120103149       | 117350466              | 120183371        | <b>120186079</b> | 120097364        | 120089504        |
| Total length (≥ 5000 bp)    | 114298074        | 111900442       | 114332150       | 110932876              | 114383380        | <b>114416230</b> | 114335355        | 113588596        |
| Total length (≥ 10000 bp)   | 110173410        | 104680036       | 110024527       | 104013656              | <b>110404451</b> | 110319450        | 110191218        | 107874824        |
| Total length (≥ 25000 bp)   | 98369482         | 82466621        | 97678502        | 82061737               | <b>99836443</b>  | 99349015         | 98927274         | 92069860         |
| Total length (≥ 50000 bp)   | 79975935         | 53718772        | 78310043        | 54010198               | <b>82227505</b>  | 81465937         | 80907051         | 69202110         |
| # contigs                   | 7662             | 8866            | 7718            | 8367                   | 7424             | 7491             | 7606             | 8532             |
| Largest contig              | 518264           | 333642          | 518140          | 439905                 | 517988           | 517989           | 518142           | <b>557849</b>    |
| Total length                | 121842729        | 120028744       | 121845718       | 118703348              | 121839229        | <b>121857032</b> | 121823758        | 121851136        |
| Reference length            | 120381546        | 120381546       | 120381546       | 120381546              | 120381546        | 120381546        | 120381546        | 120381546        |
| GC (%)                      | 42.58            | 42.53           | 42.58           | 42.52                  | 42.59            | 42.59            | 42.58            | 42.56            |
| Reference GC (%)            | 42.42            | 42.42           | 42.42           | 42.42                  | 42.42            | 42.42            | 42.42            | 42.42            |
| N50                         | 83828            | 43422           | 80542           | 44025                  | <b>91990</b>     | 89577            | 85463            | 60794            |
| NG50                        | 85463            | 43357           | 82483           | 43192                  | <b>93214</b>     | 90787            | 86717            | 62202            |
| N75                         | 35616            | 20093           | 33969           | 20060                  | <b>37814</b>     | 37416            | 35886            | 25734            |
| NG75                        | 36690            | 19951           | 35304           | 19140                  | <b>39194</b>     | 38652            | 37394            | 26815            |
| L50                         | 410              | 759             | 413             | 722                    | <b>373</b>       | 385              | 401              | 542              |
| LG50                        | 401              | 763             | 404             | 741                    | <b>365</b>       | 377              | 393              | 530              |
| L75                         | 975              | 1772            | 1005            | 1712                   | <b>892</b>       | 921              | 952              | 1305             |
| LG75                        | 945              | 1785            | 974             | 1777                   | <b>864</b>       | 892              | 923              | 1263             |
| # misassemblies             | 832              | 974             | 844             | 1006                   | 818              | <b>814</b>       | 822              | 895              |
| # misassembled contigs      | 622              | 799             | 628             | 823                    | <b>610</b>       | 616              | 619              | 695              |
| Misassembled contigs length | 50774126         | <b>37019339</b> | 50754826        | 38660485               | 54140750         | 52300325         | 51539311         | 46615389         |
| # local misassemblies       | 1884             | 1748            | 1931            | 2074                   | <b>1732</b>      | 1784             | 1817             | 1795             |
| # unaligned mis. contigs    | 29               | <b>21</b>       | 28              | 23                     | 33               | 32               | 29               | 23               |
| # unaligned contigs         | 3774 + 386 part  | 2980 + 439 part | 3762 + 392 part | <b>2371 + 381 part</b> | 3721 + 387 part  | 3739 + 375 part  | 3772 + 386 part  | 3774 + 380 part  |
| Unaligned length            | 8286358          | 6648237         | 8296140         | <b>5569650</b>         | 8335405          | 8336511          | 8284422          | 8273018          |
| Genome fraction (%)         | 93.917           | 93.629          | 93.912          | 93.537                 | 93.916           | <b>93.918</b>    | 93.914           | 93.893           |
| Duplication ratio           | <b>1.004</b>     | 1.006           | <b>1.004</b>    | 1.005                  | <b>1.004</b>     | <b>1.004</b>     | <b>1.004</b>     | 1.005            |
| # N's per 100 kbp           | 26.10            | 27.40           | 25.99           | 62.44                  | <b>24.89</b>     | 25.09            | 25.66            | 24.99            |
| # mismatches per 100 kbp    | 547.86           | 562.17          | 547.37          | 559.26                 | <b>545.82</b>    | 546.09           | 546.03           | 546.99           |
| # indels per 100 kbp        | 130.96           | 137.03          | 130.85          | 134.63                 | 131.23           | 131.10           | 130.85           | <b>130.38</b>    |
| Largest alignment           | <b>446262</b>    | 237405          | 428080          | 285020                 | 446086           | 446075           | 446204           | 375337           |
| Total aligned length        | <b>113196227</b> | 112863314       | 113184786       | 112744813              | 113175593        | 113182356        | 113188396        | 113182400        |
| NA50                        | 59641            | 35523           | 57984           | 35534                  | <b>64663</b>     | 62025            | 60667            | 46786            |
| NGA50                       | 60714            | 35425           | 59124           | 34856                  | <b>65857</b>     | 63400            | 61474            | 47781            |
| NA75                        | 25472            | 16277           | 24546           | 16539                  | <b>27792</b>     | 27188            | 26490            | 19823            |
| NGA75                       | 26604            | 16100           | 25824           | 15878                  | <b>29067</b>     | 28124            | 27588            | 20635            |
| LA50                        | 560              | 939             | 570             | 906                    | <b>524</b>       | 533              | 554              | 712              |
| LGA50                       | 548              | 944             | 557             | 930                    | <b>513</b>       | 521              | 543              | 697              |
| LA75                        | 1335             | 2191            | 1370            | 2133                   | <b>1243</b>      | 1265             | 1314             | 1707             |
| LGA75                       | 1293             | 2207            | 1326            | 2211                   | <b>1205</b>      | 1225             | 1274             | 1653             |

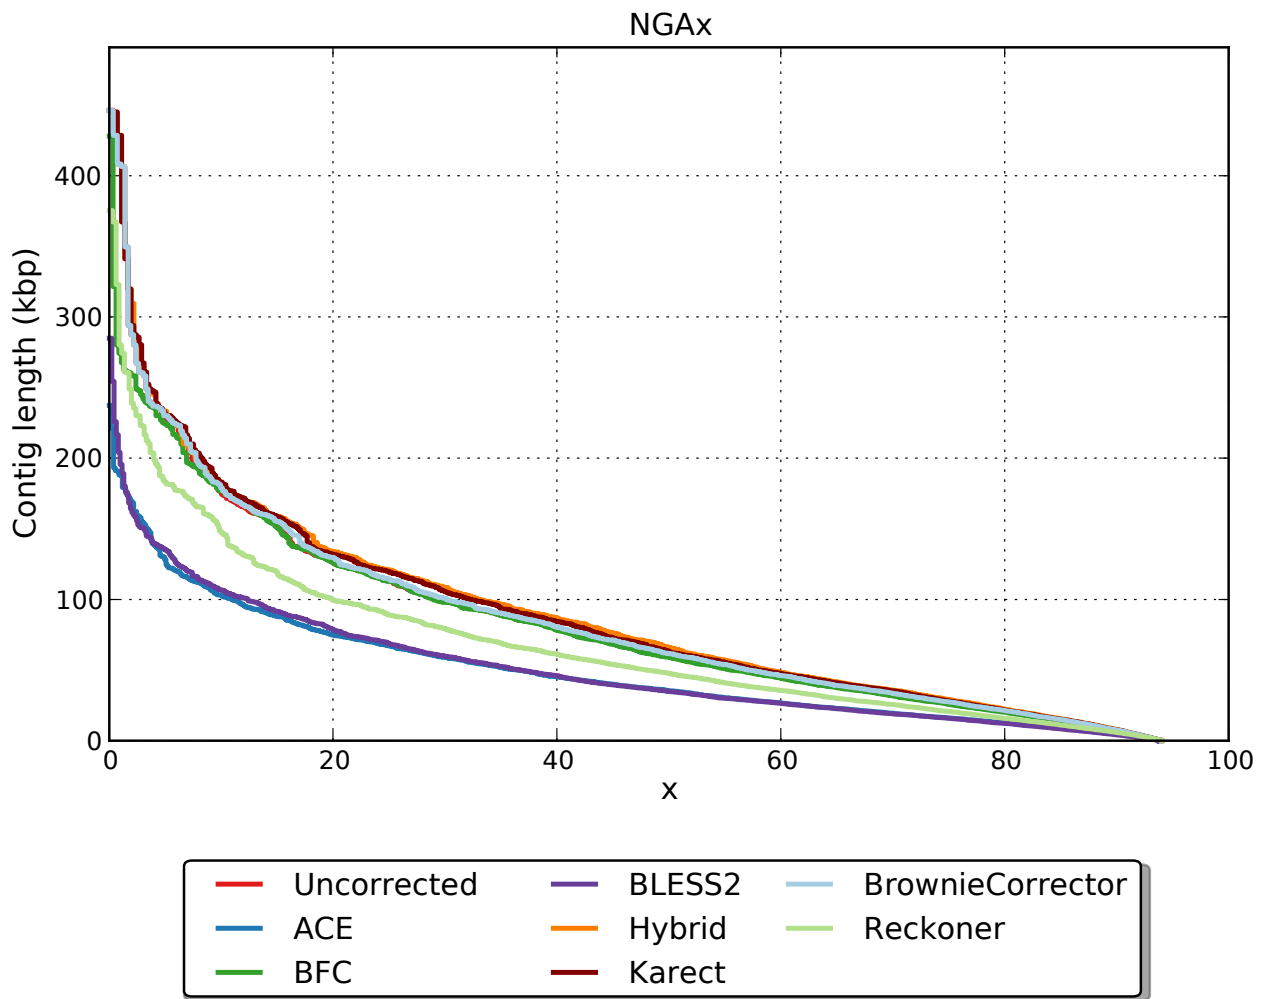

Figure 15: SPAdes assembly results for dataset D4 (*D. melanogaster*) for both uncorrected and corrected data. Contigs with length  $NGAx$  or larger produce  $x\%$  of the genome.

### 5.5.5 D5

Table 20 contains the Quast report after assembling dataset D5 (*D. melanogaster*) with SPAdes. Fig. 16 shows the corresponding NGAx plot.

Table 20: Assembly quality metrics for D5

| Assembly                        | Uncorrected     | ACE             | BFC             | BLESS2                 | Hybrid          | Karect          | BrownieCorrector | Reckoner         |
|---------------------------------|-----------------|-----------------|-----------------|------------------------|-----------------|-----------------|------------------|------------------|
| # contigs ( $\geq 0$ bp)        | 165126          | 212433          | 185876          | 197317                 | 181524          | 182557          | 164967           | 217940           |
| # contigs ( $\geq 1000$ bp)     | 4789            | 5594            | 5055            | 6310                   | 4560            | 4762            | 4482             | 5243             |
| # contigs ( $\geq 5000$ bp)     | 2621            | 3264            | 2845            | 3636                   | 2467            | 2619            | 2394             | 2970             |
| # contigs ( $\geq 10000$ bp)    | 1936            | 2476            | 2100            | 2698                   | 1833            | 1937            | 1778             | 2193             |
| # contigs ( $\geq 25000$ bp)    | 1238            | 1412            | 1300            | 1401                   | 1206            | 1243            | 1178             | 1334             |
| # contigs ( $\geq 50000$ bp)    | 729             | 660             | 724             | 620                    | 742             | 737             | 731              | 724              |
| Total length ( $\geq 0$ bp)     | 136727305       | 137556107       | 138577682       | 136206452              | 138250189       | 138294938       | 136743703        | <b>140818635</b> |
| Total length ( $\geq 1000$ bp)  | 120037979       | 116819984       | 119820170       | 117054224              | 119768316       | 119758171       | <b>120045889</b> | 119817827        |
| Total length ( $\geq 5000$ bp)  | 114951585       | 111441304       | 114683614       | 110797759              | 114967414       | 114815029       | <b>115192459</b> | 114525105        |
| Total length ( $\geq 10000$ bp) | 110058903       | 105831032       | 109406428       | 104056408              | 110451440       | 109964263       | <b>110829083</b> | 108944878        |
| Total length ( $\geq 25000$ bp) | 98578883        | 88160152        | 96224991        | 82586917               | 100140538       | 98566386        | <b>101001837</b> | 94721840         |
| Total length ( $\geq 50000$ bp) | 80201757        | 61195626        | 75734377        | 54589201               | 83311554        | 80477513        | <b>84855860</b>  | 72897465         |
| # contigs                       | 7564            | 8407            | 8070            | 8848                   | 7512            | 7720            | 7250             | 8305             |
| Largest contig                  | 635766          | 633553          | 593823          | 382830                 | 693535          | 573416          | <b>790574</b>    | 615528           |
| Total length                    | 122075582       | 118882582       | 122043781       | 118934797              | 121947926       | 121943277       | <b>122079245</b> | 122072919        |
| Reference length                | 120381546       | 120381546       | 120381546       | 120381546              | 120381546       | 120381546       | 120381546        | 120381546        |
| GC (%)                          | 42.47           | 42.53           | 42.49           | 42.50                  | 42.51           | 42.50           | 42.48            | 42.48            |
| Reference GC (%)                | 42.42           | 42.42           | 42.42           | 42.42                  | 42.42           | 42.42           | 42.42            | 42.42            |
| N50                             | 79091           | 52325           | 68696           | 45242                  | 83768           | 79386           | <b>90787</b>     | 65116            |
| NG50                            | 81525           | 51206           | 70464           | 44409                  | 85018           | 80160           | <b>92829</b>     | 65909            |
| N75                             | 34445           | 24360           | 30032           | 20786                  | 38515           | 34907           | <b>39744</b>     | 28474            |
| NG75                            | 36491           | 23546           | 31238           | 19878                  | 39914           | 36153           | <b>41573</b>     | 29856            |
| L50                             | 421             | 626             | 474             | 723                    | 397             | 425             | <b>375</b>       | 516              |
| LG50                            | 411             | 641             | 462             | 740                    | 388             | 416             | <b>366</b>       | 503              |
| L75                             | 1001            | 1453            | 1130            | 1692                   | 929             | 1001            | <b>882</b>       | 1216             |
| LG75                            | 965             | 1500            | 1089            | 1746                   | 899             | 968             | <b>850</b>       | 1173             |
| # misassemblies                 | 762             | 831             | 766             | 780                    | 756             | 757             | <b>754</b>       | 789              |
| # misassembled contigs          | 588             | 698             | 601             | 671                    | <b>570</b>      | 587             | 575              | 631              |
| Misassembled contigs length     | 49650199        | 40548248        | 45881007        | <b>34458785</b>        | 50816213        | 49036345        | 54113900         | 45207902         |
| # local misassemblies           | <b>2588</b>     | 4259            | 3458            | 4442                   | 3421            | 3420            | <b>2588</b>      | 3510             |
| # unaligned mis. contigs        | 27              | 31              | 28              | <b>18</b>              | 28              | 31              | 26               | 31               |
| # unaligned contigs             | 3627 + 370 part | 2541 + 408 part | 3559 + 384 part | <b>2410 + 375 part</b> | 3531 + 359 part | 3530 + 361 part | 3629 + 365 part  | 3591 + 373 part  |
| Unaligned length                | 8517557         | <b>5527503</b>  | 8554387         | 5579538                | 8439808         | 8436001         | 8508422          | 8522280          |
| Genome fraction (%)             | 93.780          | 93.289          | 93.578          | 93.214                 | 93.584          | 93.594          | <b>93.788</b>    | 93.581           |
| Duplication ratio               | <b>1.006</b>    | 1.009           | 1.007           | 1.010                  | 1.008           | 1.007           | <b>1.006</b>     | 1.008            |
| # N's per 100 kbp               | 589.55          | <b>565.60</b>   | 718.48          | 729.81                 | 730.60          | 728.54          | 591.23           | 721.68           |
| # mismatches per 100 kbp        | 500.54          | 500.48          | 497.06          | 502.65                 | <b>494.14</b>   | 495.59          | 497.83           | 496.90           |
| # indels per 100 kbp            | 119.70          | 119.15          | 118.61          | 118.81                 | 118.54          | 118.77          | 119.42           | <b>118.52</b>    |
| Largest alignment               | 402868          | 365720          | 385170          | 333479                 | 385163          | 385170          | <b>402877</b>    | 385169           |
| Total aligned length            | 113080516       | 112542712       | 112866314       | 112513234              | 112914086       | 112899477       | <b>113107293</b> | 112915266        |
| NA50                            | 58252           | 41363           | 53544           | 36812                  | 61763           | 58806           | <b>63652</b>     | 50153            |
| NGA50                           | 59591           | 40860           | 54093           | 36316                  | 62706           | 59526           | <b>65174</b>     | 50834            |
| NA75                            | 25864           | 19605           | 23565           | 16968                  | 27787           | 25860           | <b>28871</b>     | 21977            |
| NGA75                           | 27153           | 18756           | 24911           | 16471                  | 29033           | 26852           | <b>30231</b>     | 23124            |
| LA50                            | 574             | 786             | 629             | 877                    | 549             | 577             | <b>527</b>       | 667              |
| LGA50                           | 559             | 805             | 613             | 897                    | 536             | 564             | <b>513</b>       | 651              |
| LA75                            | 1346            | 1814            | 1479            | 2056                   | 1268            | 1345            | <b>1218</b>      | 1579             |
| LGA75                           | 1298            | 1872            | 1427            | 2121                   | 1226            | 1301            | <b>1175</b>      | 1523             |

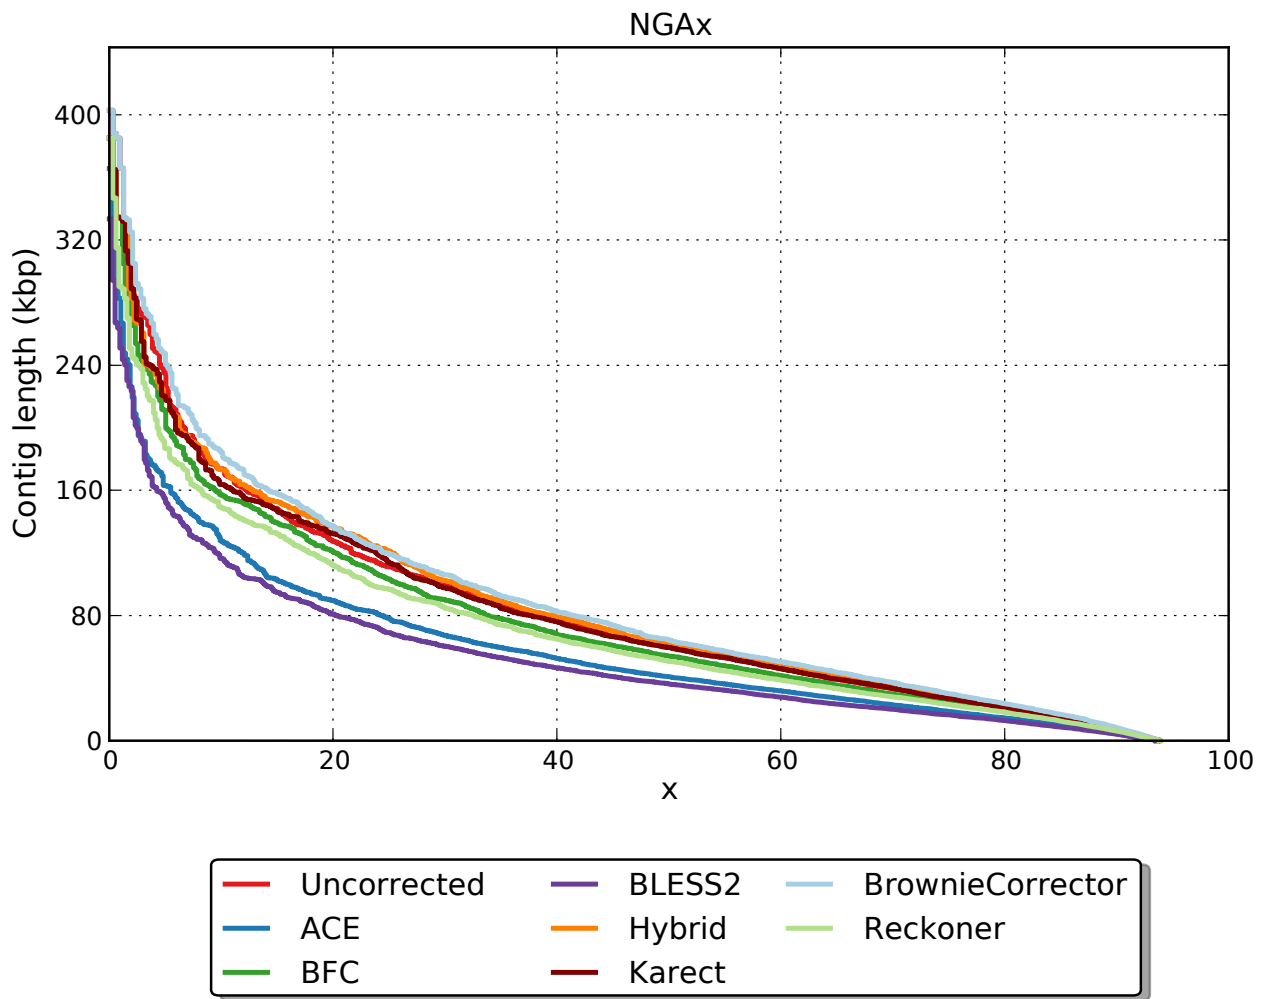

Figure 16: SPAdes assembly results for dataset D5 (*D. melanogaster*) for both uncorrected and corrected data. Contigs with length  $NGAx$  or larger produce  $x\%$  of the genome.

### 5.5.6 D6

Table 21 contains the Quast report after assembling dataset D6 (*A. thaliana*) with SPAdes. Fig. 17 shows the corresponding NGAx plot.

Table 21: Assembly quality metrics for D6

| Assembly                    | Uncorrected   | ACE           | BFC              | BLESS2               | Hybrid          | Karect        | BrownieCorrector | Reckoner         |
|-----------------------------|---------------|---------------|------------------|----------------------|-----------------|---------------|------------------|------------------|
| # contigs (≥ 0 bp)          | 153290        | 168992        | 152296           | 157691               | 156284          | 157079        | 153194           | 168975           |
| # contigs (≥ 1000 bp)       | 5162          | 5322          | 5106             | 5472                 | 4889            | 5100          | 4900             | 5279             |
| # contigs (≥ 5000 bp)       | 3342          | 3431          | 3329             | 3432                 | 3145            | 3295          | 3141             | 3402             |
| # contigs (≥ 10000 bp)      | 2489          | 2529          | 2478             | 2497                 | 2360            | 2462          | 2349             | 2529             |
| # contigs (≥ 25000 bp)      | 1322          | 1269          | 1302             | 1282                 | 1275            | 1294          | 1277             | 1300             |
| # contigs (≥ 50000 bp)      | 598           | 575           | 596              | 565                  | 611             | 593           | 615              | 599              |
| Total length (≥ 0 bp)       | 122801905     | 123596492     | 122790209        | 122366708            | 123037135       | 123098372     | 122790637        | <b>123961124</b> |
| Total length (≥ 1000 bp)    | 108714303     | 108474907     | <b>108842601</b> | 107970602            | 108759997       | 108767495     | 108713396        | 108797092        |
| Total length (≥ 5000 bp)    | 104203084     | 103753669     | <b>104453011</b> | 102836224            | 104451806       | 104264416     | 104377293        | 104095523        |
| Total length (≥ 10000 bp)   | 98015647      | 97195298      | 98261766         | 96043789             | <b>98726415</b> | 98203437      | 98629627         | 97749838         |
| Total length (≥ 25000 bp)   | 79007005      | 76716663      | 78935185         | 76403311             | 80964898        | 79112155      | <b>81203481</b>  | 77458191         |
| Total length (≥ 50000 bp)   | 53364388      | 52047704      | 53919340         | 51174509             | 57276588        | 54231397      | <b>57675590</b>  | 52534096         |
| # contigs                   | 6616          | 6774          | 6501             | 6946                 | 6304            | 6539          | 6326             | 6708             |
| Largest contig              | 378346        | 360514        | 337032           | 340077               | <b>403164</b>   | 358676        | 360062           | 292751           |
| Total length                | 109698912     | 109456349     | <b>109787184</b> | 108964952            | 109717059       | 109740727     | 109679469        | 109761199        |
| Reference length            | 119668634     | 119668634     | 119668634        | 119668634            | 119668634       | 119668634     | 119668634        | 119668634        |
| GC (%)                      | 35.96         | 35.98         | 35.96            | 35.99                | 35.97           | 35.96         | 35.96            | 35.96            |
| Reference GC (%)            | 36.06         | 36.06         | 36.06            | 36.06                | 36.06           | 36.06         | 36.06            | 36.06            |
| N50                         | 48674         | 47051         | 49223            | 46312                | 52900           | 49483         | <b>53537</b>     | 47973            |
| NG50                        | 43039         | 41281         | 43661            | 40388                | 47318           | 43958         | <b>47965</b>     | 41999            |
| N75                         | 22586         | 21015         | 22561            | 20636                | 24149           | 22647         | <b>24323</b>     | 21691            |
| NG75                        | 16229         | 15179         | 16601            | 14482                | <b>17410</b>    | 16410         | 17316            | 15906            |
| L50                         | 629           | 631           | 616              | 634                  | 565             | 606           | <b>561</b>       | 647              |
| LG50                        | 737           | 747           | 723              | 758                  | 664             | 713           | <b>660</b>       | 758              |
| L75                         | 1460          | 1503          | 1446             | 1517                 | 1329            | 1428          | <b>1320</b>      | 1508             |
| LG75                        | 1850          | 1934          | 1827             | 1979                 | 1691            | 1811          | <b>1685</b>      | 1906             |
| # misassemblies             | 157           | 151           | 167              | 194                  | <b>123</b>      | 140           | 126              | 143              |
| # misassembled contigs      | 156           | 148           | 163              | 186                  | <b>122</b>      | 134           | 125              | 138              |
| Misassembled contigs length | 7195789       | 6683457       | 8790317          | 7948697              | <b>5512136</b>  | 6420888       | 5809898          | 6525648          |
| # local misassemblies       | 91            | 95            | <b>83</b>        | 107                  | 90              | 89            | 86               | <b>83</b>        |
| # unaligned mis. contigs    | 2             | 2             | 2                | 1                    | 1               | 2             | 2                | 2                |
| # unaligned contigs         | 234 + 21 part | 161 + 24 part | 218 + 24 part    | <b>104 + 34 part</b> | 225 + 27 part   | 229 + 27 part | 233 + 22 part    | 231 + 25 part    |
| Unaligned length            | 409655        | 245951        | 410530           | <b>200169</b>        | 400587          | 402363        | 407487           | 411574           |
| Genome fraction (%)         | 91.209        | 91.115        | <b>91.285</b>    | 90.734               | 91.256          | 91.258        | 91.219           | 91.257           |
| Duplication ratio           | <b>1.001</b>  | 1.002         | <b>1.001</b>     | 1.002                | <b>1.001</b>    | <b>1.001</b>  | <b>1.001</b>     | <b>1.001</b>     |
| # N's per 100 kbp           | 11.00         | 24.65         | 10.48            | 93.43                | 12.59           | 12.23         | 10.39            | <b>10.08</b>     |
| # mismatches per 100 kbp    | 20.15         | 31.85         | 19.74            | 22.56                | 18.61           | 19.74         | <b>18.31</b>     | 19.02            |
| # indels per 100 kbp        | 5.08          | 9.70          | 5.01             | 7.65                 | 4.87            | 4.89          | <b>4.84</b>      | 4.92             |
| Largest alignment           | 378346        | 360476        | 322214           | 340077               | <b>402910</b>   | 358628        | 360023           | 292696           |
| Total aligned length        | 109238189     | 109114747     | <b>109327444</b> | 108666168            | 109275728       | 109291520     | 109231090        | 109296620        |
| NA50                        | 47023         | 45327         | 47171            | 44605                | 51586           | 48129         | <b>52551</b>     | 46233            |
| NGA50                       | 41833         | 39895         | 41818            | 38431                | 46332           | 42256         | <b>46678</b>     | 40779            |
| NA75                        | 21722         | 20139         | 21736            | 19707                | 23677           | 21873         | <b>23679</b>     | 21161            |
| NGA75                       | 15581         | 14730         | 15864            | 13950                | <b>16845</b>    | 15760         | 16687            | 15390            |
| LA50                        | 647           | 650           | 642              | 657                  | 575             | 621           | <b>573</b>       | 666              |
| LGA50                       | 759           | 770           | 752              | 786                  | 677             | 731           | <b>674</b>       | 781              |
| LA75                        | 1503          | 1556          | 1503             | 1577                 | 1356            | 1467          | <b>1351</b>      | 1554             |
| LGA75                       | 1909          | 2001          | 1900             | 2058                 | <b>1728</b>     | 1865          | <b>1728</b>      | 1963             |

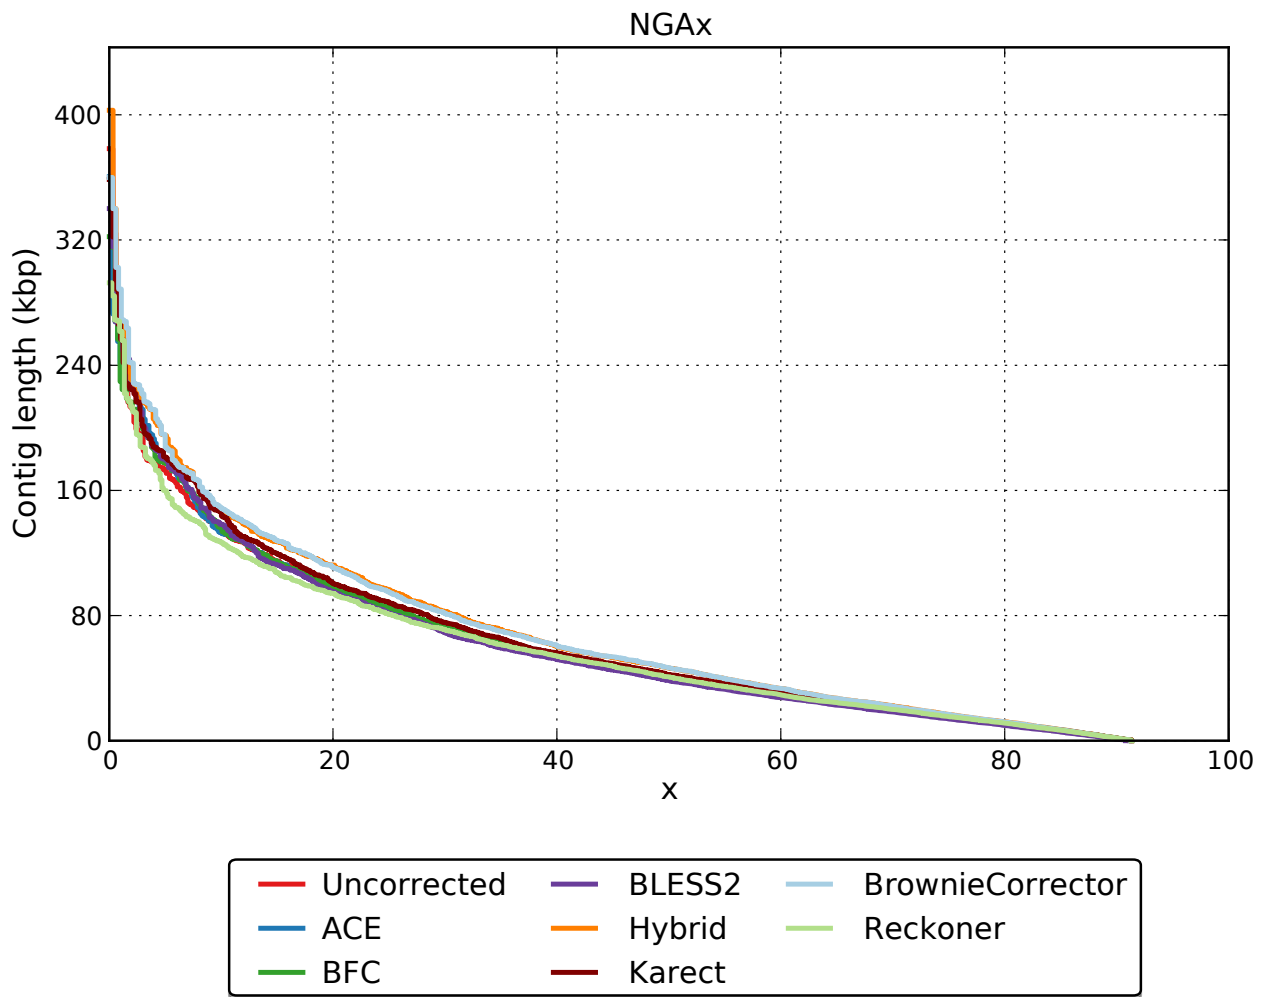

Figure 17: SPAdes assembly results for dataset D6 (*D. melanogaster*) for both uncorrected and corrected data. Contigs with length  $NGAx$  or larger produce  $x\%$  of the genome.

### 5.5.7 D7

Table 22 contains the Quast report after a hybrid assembly of dataset D7 (*D. melanogaster*) with SPAdes. This is a hybrid assembly in which the corrected (and uncorrected) Illumina reads (R4) are complemented with the Pacbio reads (P1). Fig. 18 shows the corresponding NGAx plot.

Table 22: Assembly quality metrics for D7

| Assembly                    | Uncorrected      | ACE             | BFC             | BLESS2                 | Hybrid           | Karect          | BrownieCorrector | Reckoner         |
|-----------------------------|------------------|-----------------|-----------------|------------------------|------------------|-----------------|------------------|------------------|
| # contigs (≥ 0 bp)          | 82728            | 86644           | 81601           | 84454                  | 81455            | 82018           | 82726            | 90888            |
| # contigs (≥ 1000 bp)       | 3570             | 4035            | 3705            | 3493                   | 3545             | 3566            | 3538             | 4403             |
| # contigs (≥ 5000 bp)       | 1704             | 2416            | 1799            | 2032                   | 1614             | 1658            | 1694             | 2334             |
| # contigs (≥ 10000 bp)      | 1314             | 1857            | 1369            | 1571                   | 1202             | 1229            | 1285             | 1751             |
| # contigs (≥ 25000 bp)      | 853              | 1133            | 904             | 1024                   | 798              | 818             | 854              | 1104             |
| # contigs (≥ 50000 bp)      | 579              | 694             | 605             | 658                    | 554              | 570             | 574              | 678              |
| Total length (≥ 0 bp)       | 131187203        | 129316221       | 130842102       | 128194970              | 130823725        | 130846045       | 131147292        | <b>131587165</b> |
| Total length (≥ 1000 bp)    | <b>122759330</b> | 120824487       | 122515719       | 119969315              | 122632419        | 122599419       | 122716522        | 122605532        |
| Total length (≥ 5000 bp)    | 118723698        | 116992547       | 118417293       | 116381572              | 118516483        | 118516474       | <b>118760696</b> | 118026807        |
| Total length (≥ 10000 bp)   | <b>115939340</b> | 113005485       | 115325687       | 113095422              | 115563382        | 115456277       | 115866004        | 113848935        |
| Total length (≥ 25000 bp)   | 108413703        | 101200875       | 107777428       | 104320159              | <b>108945714</b> | 108786024       | 108922843        | 103351617        |
| Total length (≥ 50000 bp)   | 98491977         | 85458576        | 96979047        | 91176824               | <b>100102272</b> | 99794613        | 98871234         | 88326978         |
| # contigs                   | 5317             | 5576            | 5498            | 4611                   | 5199             | 5232            | 5291             | 6207             |
| Largest contig              | <b>1199604</b>   | 670790          | 907732          | 602677                 | 1037537          | 908356          | 1016904          | 887190           |
| Total length                | <b>123986725</b> | 121887615       | 123769629       | 120729772              | 123793924        | 123771242       | 123945141        | 123866970        |
| Reference length            | 120381546        | 120381546       | 120381546       | 120381546              | 120381546        | 120381546       | 120381546        | 120381546        |
| GC (%)                      | 42.55            | 42.50           | 42.55           | 42.46                  | 42.56            | 42.56           | 42.55            | 42.53            |
| Reference GC (%)            | 42.42            | 42.42           | 42.42           | 42.42                  | 42.42            | 42.42           | 42.42            | 42.42            |
| N50                         | 169610           | 97526           | 159663          | 125811                 | <b>184981</b>    | 174552          | 173854           | 104119           |
| NG50                        | 179224           | 99802           | 165472          | 126462                 | <b>189080</b>    | 179261          | 179844           | 108234           |
| N75                         | 65173            | 39922           | 58324           | 50582                  | <b>73720</b>     | 70434           | 68958            | 41468            |
| NG75                        | 74095            | 41210           | 65771           | 51453                  | <b>86411</b>     | 80784           | 79734            | 46078            |
| L50                         | 198              | 343             | 214             | 262                    | <b>183</b>       | 188             | 198              | 314              |
| LG50                        | 187              | 335             | 203             | 260                    | <b>174</b>       | 178             | 187              | 298              |
| L75                         | 483              | 829             | 529             | 646                    | <b>434</b>       | 453             | 472              | 779              |
| LG75                        | 444              | 801             | 487             | 641                    | <b>402</b>       | 419             | 436              | 719              |
| # misassemblies             | 1093             | 1198            | 1095            | 1254                   | 1058             | <b>1049</b>     | 1073             | 1190             |
| # misassembled contigs      | 576              | 751             | 568             | 703                    | <b>548</b>       | 549             | 570              | 691              |
| Misassembled contigs length | 77195891         | <b>65434373</b> | 74113978        | 72211756               | 79124616         | 77842226        | 77576813         | 65900369         |
| # local misassemblies       | 1912             | <b>1762</b>     | 1886            | 1911                   | 1802             | 1851            | 1871             | 2032             |
| # unaligned mis. contigs    | 140              | 127             | 135             | <b>105</b>             | 125              | 132             | 129              | 137              |
| # unaligned contigs         | 3051 + 699 part  | 2271 + 771 part | 3086 + 724 part | <b>1719 + 662 part</b> | 3061 + 730 part  | 3047 + 735 part | 3057 + 702 part  | 3103 + 746 part  |
| Unaligned length            | 9623179          | 7729395         | 9471622         | <b>6671029</b>         | 9531780          | 9527862         | 9589547          | 9494184          |
| Genome fraction (%)         | 94.484           | 94.275          | 94.474          | 94.248                 | 94.478           | 94.456          | <b>94.486</b>    | 94.431           |
| Duplication ratio           | <b>1.005</b>     | 1.006           | <b>1.005</b>    | <b>1.005</b>           | <b>1.005</b>     | <b>1.005</b>    | <b>1.005</b>     | 1.006            |
| # N's per 100 kbp           | 483.18           | <b>408.89</b>   | 460.28          | 422.82                 | 447.36           | 439.87          | 475.04           | 449.96           |
| # mismatches per 100 kbp    | 556.84           | 567.59          | 556.70          | 562.67                 | 554.80           | <b>553.80</b>   | 555.55           | 556.33           |
| # indels per 100 kbp        | 134.33           | 141.80          | 134.28          | 145.24                 | 133.75           | 133.66          | 134.05           | <b>133.40</b>    |
| Largest alignment           | 570650           | 428847          | 443438          | 338930                 | 570790           | <b>570959</b>   | 570669           | 406192           |
| Total aligned length        | <b>114102548</b> | 113780243       | 114027727       | 113763228              | 114012129        | 113990788       | 114097579        | 114030717        |
| NA50                        | 92022            | 61834           | 88388           | 73292                  | <b>99412</b>     | 97727           | 92238            | 64742            |
| NGA50                       | 96381            | 62981           | 91577           | 73377                  | <b>103872</b>    | 101753          | 96385            | 67061            |
| NA75                        | 37711            | 26304           | 35621           | 32030                  | <b>42031</b>     | 40768           | 38469            | 27161            |
| NGA75                       | 41779            | 27692           | 39269           | 32305                  | <b>45314</b>     | 44500           | 42580            | 29658            |
| LA50                        | 373              | 538             | 390             | 462                    | <b>352</b>       | 358             | 369              | 514              |
| LGA50                       | 354              | 526             | 371             | 460                    | <b>335</b>       | 341             | 350              | 487              |
| LA75                        | 894              | 1281            | 940             | 1079                   | <b>829</b>       | 848             | 883              | 1243             |
| LGA75                       | 826              | 1240            | 872             | 1071                   | <b>771</b>       | 789             | 817              | 1151             |

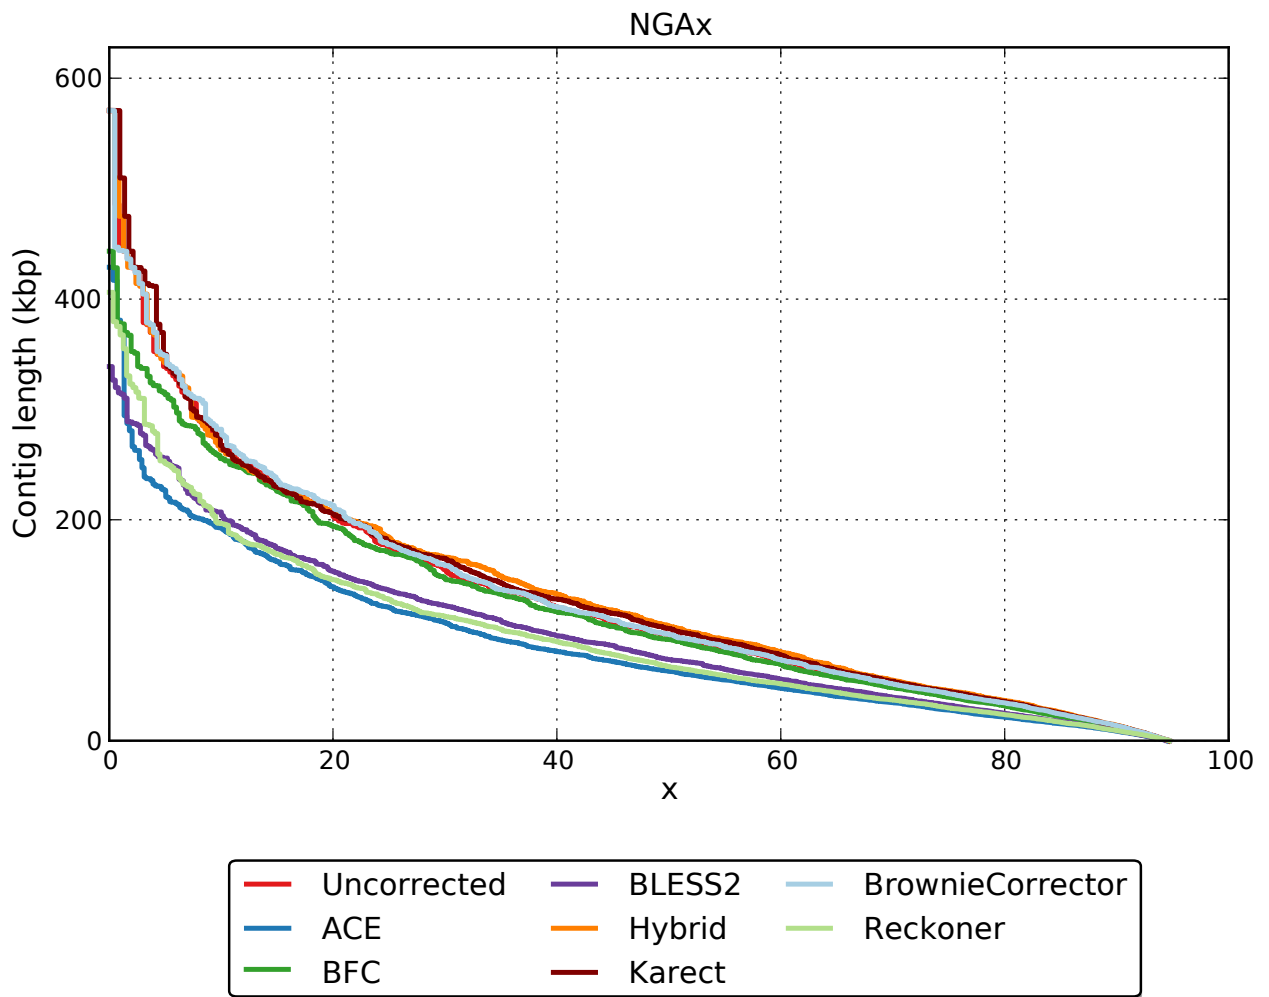

Figure 18: SPAdes assembly results for dataset D7 (*D. melanogaster*) for both uncorrected and corrected data. Contigs with length  $NGAx$  or larger produce  $x\%$  of the genome.



### 5.5.8 D8

Table 23 contains the Quast report after assembling dataset D8 *D. melanogaster* with SPAdes. This is a hybrid assembly in which the corrected (and uncorrected) Illumina reads (R5) are complemented with the Pacbio reads (P1). Fig. 19 shows the corresponding NGAx plot.

Table 23: Assembly quality metrics for D8

| Assembly                        | Uncorrected     | ACE             | BFC              | BLESS2                 | Hybrid           | Karect          | BrownieCorrector | Reckoner         |
|---------------------------------|-----------------|-----------------|------------------|------------------------|------------------|-----------------|------------------|------------------|
| # contigs ( $\geq 0$ bp)        | 149228          | 191379          | 166969           | 174905                 | 162558           | 163826          | 149066           | 199481           |
| # contigs ( $\geq 1000$ bp)     | 3216            | 2996            | 3107             | 3393                   | 2749             | 2859            | 3001             | 3290             |
| # contigs ( $\geq 5000$ bp)     | 1718            | 1706            | 1683             | 1903                   | 1399             | 1483            | 1547             | 1855             |
| # contigs ( $\geq 10000$ bp)    | 1201            | 1308            | 1177             | 1441                   | 984              | 1053            | 1068             | 1340             |
| # contigs ( $\geq 25000$ bp)    | 779             | 854             | 759              | 956                    | 627              | 663             | 697              | 862              |
| # contigs ( $\geq 50000$ bp)    | 536             | 560             | 529              | 637                    | 459              | 474             | 489              | 572              |
| Total length ( $\geq 0$ bp)     | 137006538       | 137208923       | 138629176        | 135737931              | 138182929        | 138240801       | 137010216        | <b>140815351</b> |
| Total length ( $\geq 1000$ bp)  | 122386145       | 119633304       | <b>122499150</b> | 119842489              | 122364837        | 122306783       | 122404017        | 122425002        |
| Total length ( $\geq 5000$ bp)  | 118896712       | 116646454       | 119167322        | 116397113              | <b>119223919</b> | 119086628       | 119025946        | 119068877        |
| Total length ( $\geq 10000$ bp) | 115233784       | 113711648       | 115580814        | 113066925              | <b>116307772</b> | 116071704       | 115635740        | 115382004        |
| Total length ( $\geq 25000$ bp) | 108540040       | 106412774       | 108957987        | 105232289              | <b>110727634</b> | 110012601       | 109875005        | 107869724        |
| Total length ( $\geq 50000$ bp) | 99903980        | 95839747        | 100902805        | 93606395               | <b>104904218</b> | 103401295       | 102484228        | 97699745         |
| # contigs                       | 5319            | 4525            | 5155             | 4582                   | 4748             | 4889            | 5076             | 5379             |
| Largest contig                  | 1078505         | 1097937         | 1329229          | 873186                 | <b>1577991</b>   | 1472989         | 1315292          | 834563           |
| Total length                    | 123920625       | 120711602       | <b>123995028</b> | 120697350              | 123832426        | 123797326       | 123920633        | 123949799        |
| Reference length                | 120381546       | 120381546       | 120381546        | 120381546              | 120381546        | 120381546       | 120381546        | 120381546        |
| GC (%)                          | 42.44           | 42.48           | 42.44            | 42.45                  | 42.46            | 42.46           | 42.44            | 42.44            |
| Reference GC (%)                | 42.42           | 42.42           | 42.42            | 42.42                  | 42.42            | 42.42           | 42.42            | 42.42            |
| N50                             | 195145          | 173427          | 209236           | 141236                 | <b>278523</b>    | 252831          | 240349           | 164454           |
| NG50                            | 202478          | 173448          | 217832           | 141956                 | <b>293584</b>    | 264260          | 250321           | 175352           |
| N75                             | 73641           | 66031           | 77292            | 56469                  | <b>102606</b>    | 93760           | 88826            | 64991            |
| NG75                            | 83516           | 66621           | 85145            | 56958                  | <b>113846</b>    | 104548          | 101313           | 71933            |
| L50                             | 170             | 196             | 156              | 241                    | <b>115</b>       | 126             | 140              | 196              |
| LG50                            | 161             | 195             | 148              | 240                    | <b>109</b>       | 120             | 133              | 185              |
| L75                             | 422             | 468             | 402              | 578                    | <b>294</b>       | 324             | 348              | 489              |
| LG75                            | 388             | 464             | 368              | 574                    | <b>270</b>       | 298             | 319              | 449              |
| # misassemblies                 | 936             | 999             | 966              | <b>933</b>             | 952              | 944             | 934              | 998              |
| # misassembled contigs          | 497             | 557             | 490              | 588                    | <b>438</b>       | 456             | 467              | 558              |
| Misassembled contigs length     | 79855723        | 76678055        | 81266528         | <b>67931475</b>        | 88449521         | 86859421        | 85282570         | 78755301         |
| # local misassemblies           | 1646            | 1697            | 1741             | 1685                   | 1646             | <b>1619</b>     | 1658             | 1690             |
| # unaligned mis. contigs        | 101             | 101             | 116              | 107                    | 107              | 113             | <b>97</b>        | 108              |
| # unaligned contigs             | 3150 + 604 part | 2051 + 605 part | 3015 + 629 part  | <b>1916 + 581 part</b> | 2976 + 597 part  | 2979 + 602 part | 3137 + 599 part  | 3061 + 610 part  |
| Unaligned length                | 9788711         | <b>6681807</b>  | 9833294          | 6696692                | 9705532          | 9659228         | 9818310          | 9743468          |
| Genome fraction (%)             | <b>94.396</b>   | 94.239          | 94.368           | 94.186                 | 94.387           | <b>94.396</b>   | 94.391           | 94.363           |
| Duplication ratio               | <b>1.004</b>    | 1.005           | 1.005            | 1.005                  | <b>1.004</b>     | <b>1.004</b>    | <b>1.004</b>     | 1.005            |
| # N's per 100 kbp               | 883.63          | <b>691.64</b>   | 948.10           | 791.18                 | 962.03           | 945.40          | 887.88           | 951.17           |
| # mismatches per 100 kbp        | 505.84          | 504.41          | 501.43           | 504.88                 | 501.19           | <b>500.63</b>   | 505.00           | 502.12           |
| # indels per 100 kbp            | 120.65          | 119.95          | 118.99           | 122.14                 | <b>118.96</b>    | 119.05          | 120.48           | 119.18           |
| Largest alignment               | 562955          | 488967          | 779743           | 508037                 | 630299           | <b>824208</b>   | 630640           | 562981           |
| Total aligned length            | 113900519       | 113715614       | 113916864        | 113699300              | 113906488        | 113910162       | 113887441        | <b>113924772</b> |
| NA50                            | 106095          | 92928           | 106110           | 86055                  | <b>121172</b>    | 119421          | 113318           | 95924            |
| NGA50                           | 109785          | 93602           | 110748           | 86526                  | <b>126449</b>    | 124215          | 118192           | 99419            |
| NA75                            | 41483           | 39367           | 43182            | 37065                  | <b>51555</b>     | 48231           | 47013            | 37077            |
| NGA75                           | 45799           | 40003           | 47338            | 37379                  | <b>57604</b>     | 54004           | 52514            | 41418            |
| LA50                            | 338             | 362             | 322              | 388                    | <b>280</b>       | 291             | 307              | 360              |
| LGA50                           | 322             | 360             | 305              | 386                    | <b>266</b>       | 277             | 291              | 341              |
| LA75                            | 798             | 848             | 778              | 913                    | <b>663</b>       | 691             | 720              | 871              |
| LGA75                           | 737             | 842             | 718              | 907                    | <b>615</b>       | 641             | 667              | 803              |

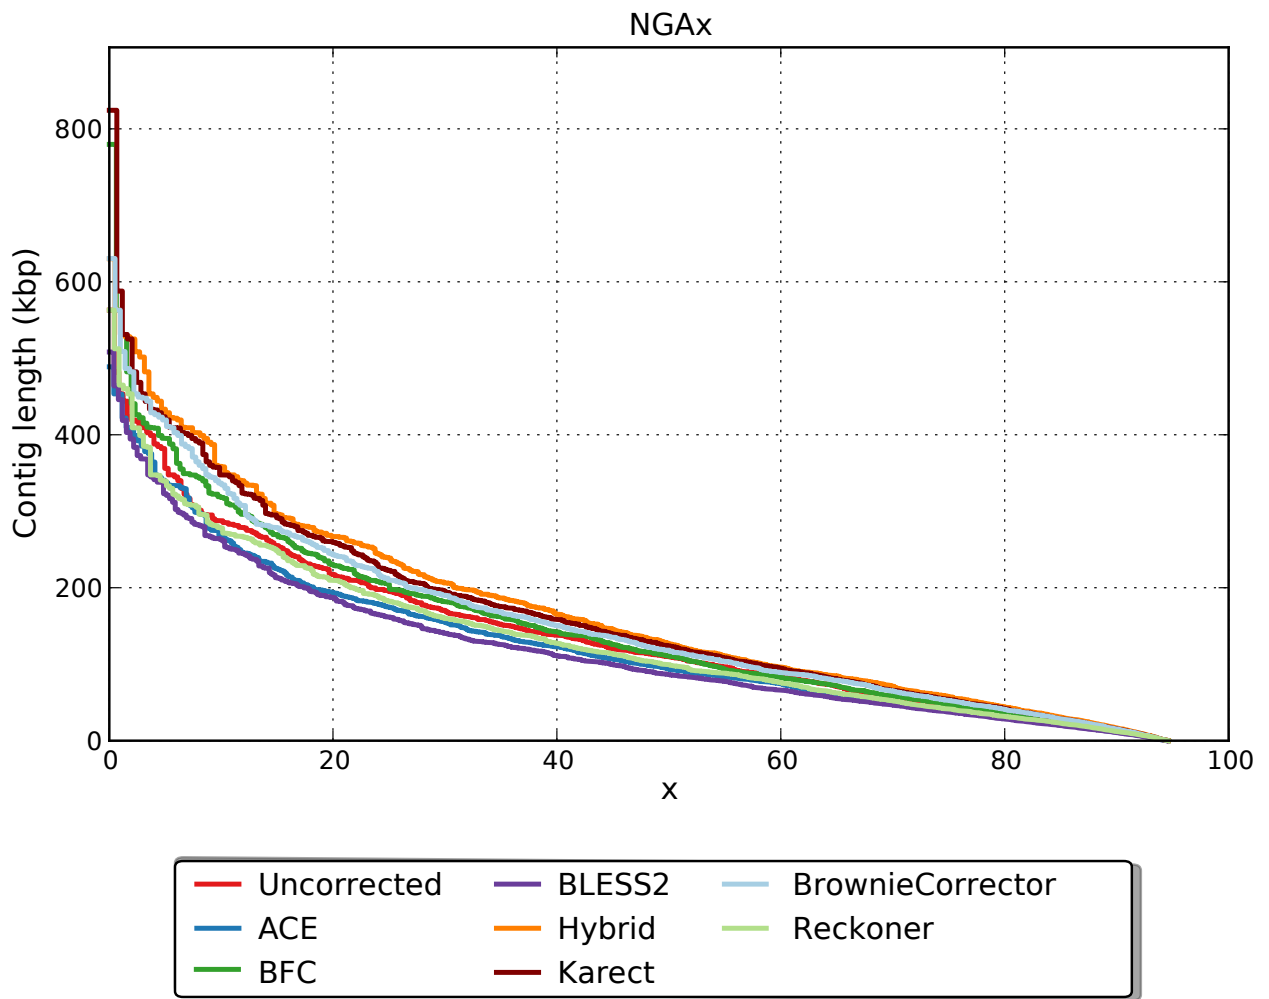

Figure 19: SPAdes assembly results for dataset D8 (*D. melanogaster*) for both uncorrected and corrected data. Contigs with length  $NGAx$  or larger produce  $x\%$  of the genome.

### 5.5.9 D9

Table 24 contains the Quast report after assembling dataset D9 (*A. thaliana*) with SPAdes. This is a hybrid assembly in which the corrected (and uncorrected) Illumina reads (R6) are complemented with the Pacbio reads (P2). Fig. 20 shows the corresponding NGAx plot.

Table 24: Assembly quality metrics for D9

| Assembly                    | Uncorrected    | ACE            | BFC              | BLESS2                | Hybrid           | Karect         | BrownieCorrector | Reckoner         |
|-----------------------------|----------------|----------------|------------------|-----------------------|------------------|----------------|------------------|------------------|
| # contigs (≥ 0 bp)          | 142089         | 157367         | 141808           | 146982                | 145087           | 146112         | 142070           | 157568           |
| # contigs (≥ 1000 bp)       | 3227           | 3340           | 3189             | 3629                  | 3097             | 3197           | 3090             | 3412             |
| # contigs (≥ 5000 bp)       | 1915           | 1998           | 1926             | 2157                  | 1777             | 1864           | 1791             | 2077             |
| # contigs (≥ 10000 bp)      | 1460           | 1528           | 1455             | 1629                  | 1365             | 1427           | 1365             | 1612             |
| # contigs (≥ 25000 bp)      | 954            | 947            | 966              | 1011                  | 857              | 908            | 877              | 1054             |
| # contigs (≥ 50000 bp)      | 615            | 604            | 613              | 588                   | 559              | 587            | 565              | 654              |
| Total length (≥ 0 bp)       | 123813843      | 124547852      | 123778880        | 123452408             | 124109646        | 124097329      | 123825918        | <b>124894825</b> |
| Total length (≥ 1000 bp)    | 110920359      | 110650660      | 110973623        | 110165631             | <b>111016302</b> | 110947707      | 110946362        | 110941841        |
| Total length (≥ 5000 bp)    | 107630324      | 107241203      | <b>107824566</b> | 106411218             | 107715793        | 107603069      | 107704107        | 107587644        |
| Total length (≥ 10000 bp)   | 104366913      | 103820948      | 104426193        | 102640491             | <b>104764365</b> | 104467517      | 104638648        | 104241224        |
| Total length (≥ 25000 bp)   | 96121787       | 94226910       | 96285383         | 92636453              | 96331162         | 95891626       | <b>96638802</b>  | 95024283         |
| Total length (≥ 50000 bp)   | 83940356       | 82224621       | 83679724         | 77761041              | <b>85845567</b>  | 84494501       | 85456925         | 80760253         |
| # contigs                   | 4250           | 4359           | 4177             | 4656                  | 4095             | 4195           | 4100             | 4398             |
| Largest contig              | 692396         | 548881         | 692397           | 664835                | 706587           | <b>799938</b>  | 673567           | 568204           |
| Total length                | 111616529      | 111339614      | 111643887        | 110865743             | <b>111696039</b> | 111628269      | 111630438        | 111613165        |
| Reference length            | 119668634      | 119668634      | 119668634        | 119668634             | 119668634        | 119668634      | 119668634        | 119668634        |
| GC (%)                      | 35.94          | 35.96          | 35.95            | 35.96                 | 35.95            | 35.95          | 35.94            | 35.94            |
| Reference GC (%)            | 36.06          | 36.06          | 36.06            | 36.06                 | 36.06            | 36.06          | 36.06            | 36.06            |
| N50                         | 122106         | 116453         | 117977           | 101712                | <b>150944</b>    | 130668         | 143649           | 100710           |
| NG50                        | 108902         | 107645         | 104580           | 92073                 | <b>132808</b>    | 117943         | 129072           | 93533            |
| N75                         | 50880          | 46312          | 49848            | 39472                 | <b>56026</b>     | 52705          | 54148            | 44144            |
| NG75                        | 39074          | 33291          | 36446            | 29040                 | 39395            | 37369          | <b>40588</b>     | 33255            |
| L50                         | 254            | 265            | 254              | 279                   | <b>212</b>       | 237            | 218              | 308              |
| LG50                        | 289            | 302            | 289              | 324                   | <b>240</b>       | 270            | 248              | 350              |
| L75                         | 611            | 631            | 615              | 710                   | <b>520</b>       | 572            | 532              | 717              |
| LG75                        | 748            | 791            | 754              | 904                   | <b>648</b>       | 708            | 661              | 873              |
| # misassemblies             | 837            | 836            | 814              | 829                   | 793              | <b>775</b>     | 800              | 830              |
| # misassembled contigs      | 554            | 582            | 552              | 581                   | 526              | 528            | <b>523</b>       | 555              |
| Misassembled contigs length | 43095471       | 42734679       | 44104032         | <b>36877771</b>       | 45541239         | 43327594       | 45333670         | 38686180         |
| # local misassemblies       | 644            | 641            | 648              | 686                   | <b>638</b>       | <b>638</b>     | 640              | 723              |
| # unaligned mis. contigs    | 13             | 8              | 10               | 12                    | 8                | <b>7</b>       | 9                | 8                |
| # unaligned contigs         | 266 + 425 part | 191 + 409 part | 245 + 402 part   | <b>147 + 388 part</b> | 248 + 400 part   | 263 + 379 part | 259 + 411 part   | 262 + 407 part   |
| Unaligned length            | 1229535        | 1018600        | 1151096          | <b>999954</b>         | 1227225          | 1154999        | 1226425          | 1152483          |
| Genome fraction (%)         | 91.805         | 91.747         | <b>91.912</b>    | 91.363                | 91.876           | 91.866         | 91.824           | 91.849           |
| Duplication ratio           | 1.005          | 1.005          | 1.005            | 1.005                 | 1.005            | 1.005          | 1.005            | 1.005            |
| # N's per 100 kbp           | 511.05         | 490.09         | 475.62           | 493.59                | 505.76           | <b>471.17</b>  | 501.25           | 477.68           |
| # mismatches per 100 kbp    | 52.02          | 59.49          | 52.33            | 59.19                 | 52.05            | 52.67          | 51.50            | <b>51.00</b>     |
| # indels per 100 kbp        | 11.29          | 16.44          | 11.22            | 21.71                 | 10.74            | 10.92          | <b>10.73</b>     | <b>10.73</b>     |
| Largest alignment           | 559314         | 527818         | 619363           | 663821                | 635802           | 648971         | <b>671915</b>    | 567176           |
| Total aligned length        | 110285821      | 110197159      | <b>110387175</b> | 109731628             | 110371573        | 110368712      | 110301676        | 110342848        |
| NA50                        | 95741          | 93437          | 94016            | 85059                 | <b>114187</b>    | 101700         | 110521           | 80931            |
| NGA50                       | 84659          | 83138          | 82101            | 74447                 | <b>104037</b>    | 90661          | 96916            | 71646            |
| NA75                        | 38622          | 34585          | 37278            | 31270                 | 40532            | 38578          | <b>40986</b>     | 34410            |
| NGA75                       | 27591          | 25059          | 27698            | 22761                 | 28609            | 28222          | <b>29163</b>     | 25910            |
| LA50                        | 315            | 322            | 322              | 336                   | <b>268</b>       | 292            | 274              | 376              |
| LGA50                       | 360            | 369            | 367              | 391                   | <b>304</b>       | 334            | 312              | 429              |
| LA75                        | 779            | 805            | 793              | 884                   | <b>678</b>       | 734            | 694              | 903              |
| LGA75                       | 965            | 1019           | 980              | 1131                  | <b>853</b>       | 916            | 868              | 1104             |

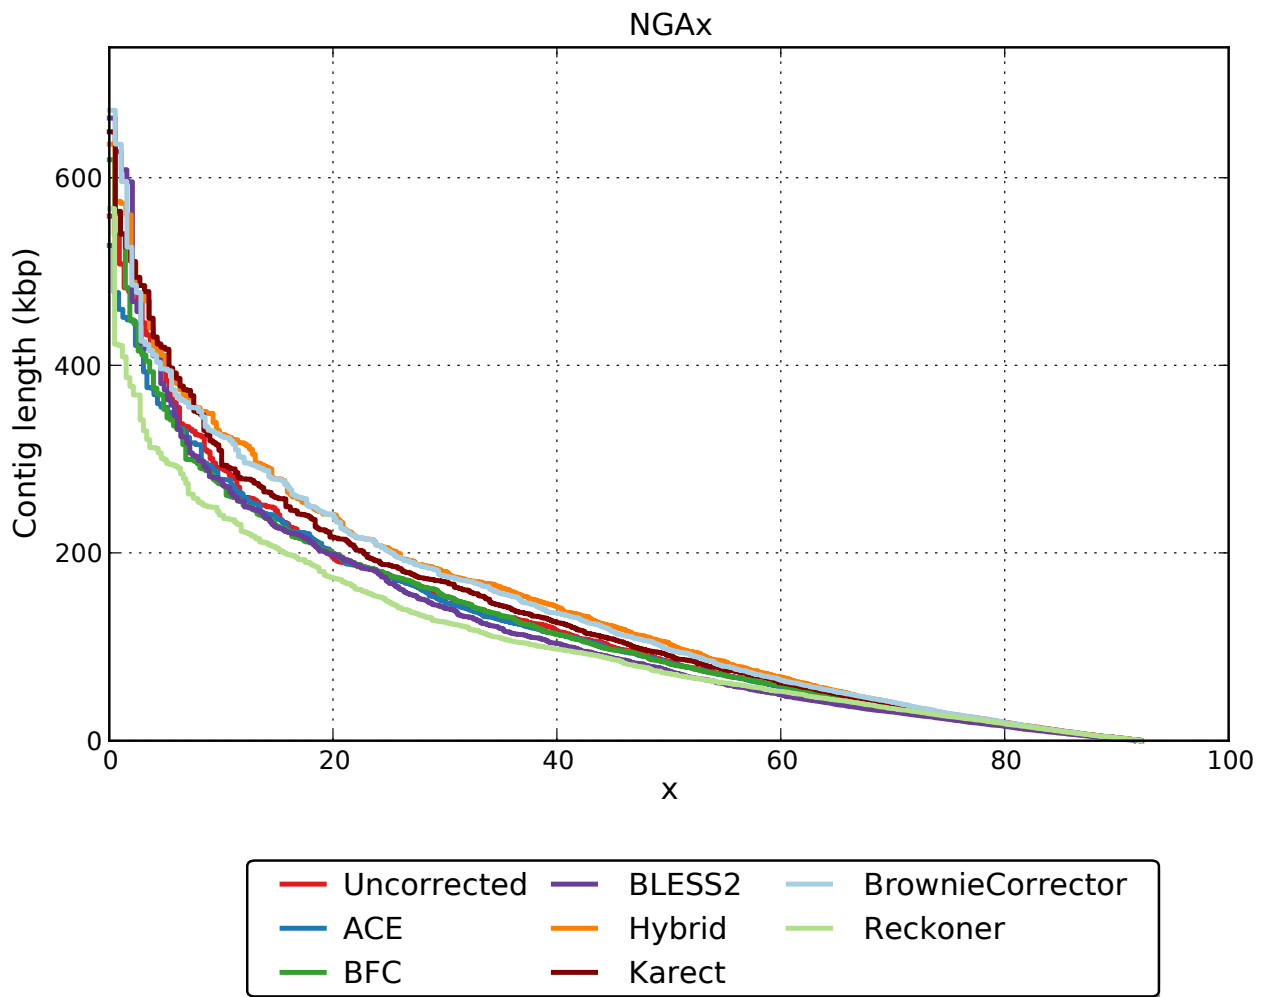

Figure 20: SPAdes assembly results for dataset D9 (*A. thaliana*) for both uncorrected and corrected data. Contigs with length  $NGAx$  or larger produce  $x\%$  of the genome.

## 5.6 Runtime and memory usage

Table 25 and 26 provide the detail numbers of peak memory usage and the runtime (wall time) of EC tools on datasets respectively.

Table 25: Peak memory (GB) usage of the aligners on real data.

| Tools            | D1          | D2          | D3          | D4          | D5          | D6          |
|------------------|-------------|-------------|-------------|-------------|-------------|-------------|
| ACE              | 6.81        | 27.34       | 30.41       | 31.18       | 39.15       | 30.73       |
| BFC              | <b>2.43</b> | 4.73        | 5.15        | 5.21        | 5.23        | 5.29        |
| BLESS2           | 3.90        | <b>3.90</b> | <b>3.90</b> | <b>3.90</b> | <b>3.90</b> | <b>3.89</b> |
| BrownieCorrector | 2.64        | 20.66       | 17.19       | 4.70        | 7.11        | 7.21        |
| Karect           | 29.76       | 86.99       | 136.64      | 145.25      | 171.37      | 188.59      |
| Reckoner         | 3.75        | 3.94        | 3.95        | 3.94        | 3.97        | 3.96        |

Table 26: Run time (min) of the aligners on real data

| Tools            | D1          | D2          | D3          | D4          | D5          | D6          |
|------------------|-------------|-------------|-------------|-------------|-------------|-------------|
| ACE              | 67.03       | 182.62      | 325.02      | 329.82      | 370.43      | 355.25      |
| BFC              | 0.91        | <b>2.71</b> | 3.41        | 4.20        | 5.41        | 6.50        |
| BLESS2           | 1.25        | 4.49        | 4.83        | 6.31        | 8.85        | 8.51        |
| BrownieCorrector | 27.72       | 96.40       | 48.85       | 46.23       | 57.95       | 40.11       |
| Karect           | 6.96        | 31.44       | 55.03       | 62.78       | 69.68       | 52.35       |
| Reckoner         | <b>0.70</b> | 3.44        | <b>3.05</b> | <b>2.97</b> | <b>4.61</b> | <b>3.45</b> |

## References

- [1] Heydari, M., Miclotte, G., Van de Peer, Y., Fostier, J.: BrownieAligner: accurate alignment of illumina sequencing data to de bruijn graphs. BMC Bioinformatics **19**(1) (2018)
